# Supplementary material for: Female-biased upregulation of insulin pathway activity mediates the sex difference in Drosophila body size plasticity
Source: eLife journal article supplement (doi:10.7554/elife.58341), 2021-01-15
Supplement: supp [file elife-58341-supp-v1.zip]

Archive with 30 entries (30 files):
- elife_poa_e58341_Transparent_Reporting_File.docx
- elife_poa_e58341_Supplementary_file_1.xlsx
- elife_poa_e58341_Supplementary_file_2.xlsx
- elife_poa_e58341_Supplementary_file_3.xlsx
- elife_poa_e58341_Supplementary_file_4.xlsx
- elife_poa_e58341_Supplementary_file_5.xlsx
- elife_poa_e58341_Figure_1_figure_supplement_1.pdf
- elife_poa_e58341_Figure_1_figure_supplement_2.pdf
- elife_poa_e58341_Figure_1_figure_supplement_3.pdf
- elife_poa_e58341_Figure_1_figure_supplement_4.pdf
- elife_poa_e58341_Figure_1_figure_supplement_5.pdf
- elife_poa_e58341_Figure_1_figure_supplement_6.pdf
- elife_poa_e58341_Figure_1_figure_supplement_7.pdf
- elife_poa_e58341_Figure_2_figure_supplement_1.pdf
- elife_poa_e58341_Figure_2_figure_supplement_2.pdf
- elife_poa_e58341_Figure_2_figure_supplement_3.pdf
- elife_poa_e58341_Figure_2_figure_supplement_4.pdf
- elife_poa_e58341_Figure_3_figure_supplement_1.pdf
- elife_poa_e58341_Figure_3_figure_supplement_2.pdf
- elife_poa_e58341_Figure_3_figure_supplement_3.pdf
- elife_poa_e58341_Figure_3_figure_supplement_4.pdf
- elife_poa_e58341_Figure_3_figure_supplement_5.pdf
- elife_poa_e58341_Figure_3_figure_supplement_6.pdf
- elife_poa_e58341_Figure_3_figure_supplement_7.pdf
- elife_poa_e58341_Figure_3_figure_supplement_8.pdf
- elife_poa_e58341_Figure_4_figure_supplement_1.pdf
- elife_poa_e58341_Figure_4_figure_supplement_2.pdf
- elife_poa_e58341_Figure_4_figure_supplement_3.pdf
- elife_poa_e58341_Figure_5_figure_supplement_1.pdf
- elife_poa_e58341_Figure_5_figure_supplement_2.pdf
