# Supplementary material for: Female-biased upregulation of insulin pathway activity mediates the sex difference in Drosophila body size plasticity
Source: eLife journal article supplement (doi:10.7554/elife.58341), 2021-01-15

**Figure 3 - figure supplement 2**

**A** *sun<sup>RA</sup>* mRNA levels - Female

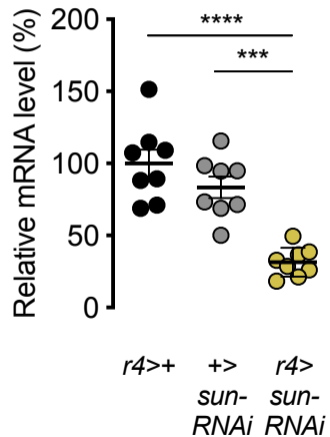

**B** *sun<sup>RA</sup>* mRNA levels - Male

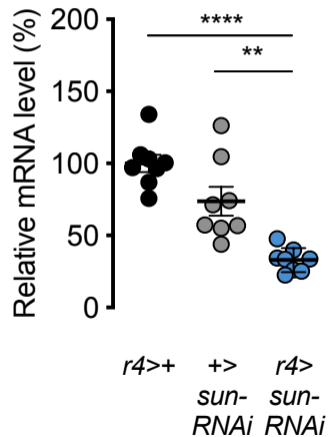

**C** *GAL4* mRNA levels

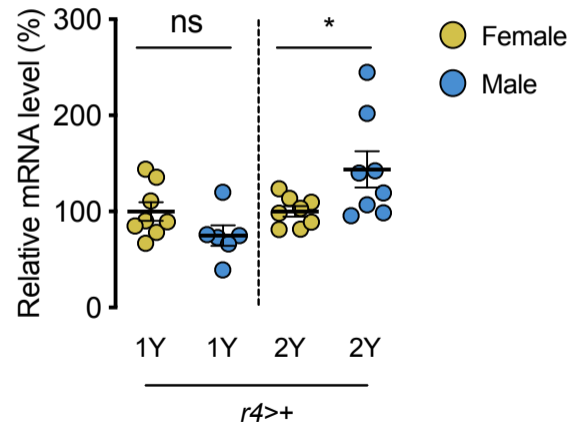

Supplement: supp [file elife-58341-supp-v1.zip › elife_poa_e58341_Figure_3_figure_supplement_2.pdf]
