# Supplementary material for: Female-biased upregulation of insulin pathway activity mediates the sex difference in Drosophila body size plasticity
Source: eLife journal article supplement (doi:10.7554/elife.58341), 2021-01-15
Supplement: supp [file elife-58341-supp-v1.zip › elife_poa_e58341_Supplementary_file_1.xlsx]

## Sheet: Figure 1
A / B										C / D										E			F			G			H			I											J
Table Analyzed	Whole AW plast 0.5 1									Table Analyzed	AW plast FvM 1v2									Table Analyzed	F IIS aggregate females plast		Table Analyzed	F tGPH 1Y 2Y		Table Analyzed	M IIS agg plast 2 column		Table Analyzed	M tGPH 1Y 2Y		Table Analyzed	F w InR plast										Table Analyzed	M w InR plast
Two-way ANOVA	Ordinary									Two-way ANOVA	Ordinary									Column B	F IIS 2Y		Column B	2Y		Column B	M IIS 2Y		Column B	2Y		Two-way ANOVA	Ordinary										Two-way ANOVA	Ordinary
Alpha	0.05									Alpha	0.05									vs.	vs.		vs.	vs.		vs.	vs.		vs.	vs.		Alpha	0.05										Alpha	0.05
																				Column A	F IIS 1Y		Column A	1Y		Column A	M IIS 1Y		Column A	1Y
Source of Variation	% of total variation	P value	P value summary	Significant?						Source of Variation	% of total variation	P value	P value summary	Significant?																		Source of Variation	% of total variation	P value	P value summary	Significant?							Source of Variation	% of total variation	P value	P value summary	Significant?
Interaction	0.3936	0.3197	ns	No						Interaction	6.456	< 0.0001	****	Yes						Unpaired t test			Unpaired t test			Unpaired t test			Unpaired t test			Interaction	5.058	< 0.0001	****	Yes							Interaction	1.048	0.0232	*	Yes
Diet	26.13	< 0.0001	****	Yes						Diet	3.504	0.0004	***	Yes						P value	<0.0001		P value	0.001		P value	0.7323		P value	0.0892		Diet	23.05	< 0.0001	****	Yes							Diet	23.48	< 0.0001	****	Yes
Sex	65.64	< 0.0001	****	Yes						Sex	71.87	< 0.0001	****	Yes						P value summary	****		P value summary	***		P value summary	ns		P value summary	ns		Genotype	22.2	< 0.0001	****	Yes							Genotype	15.42	< 0.0001	****	Yes
																				Significantly different (P < 0.05)?	Yes		Significantly different (P < 0.05)?	Yes		Significantly different (P < 0.05)?	No		Significantly different (P < 0.05)?	No
ANOVA table	SS	DF	MS	F (DFn, DFd)	P value					ANOVA table	SS	DF	MS	F (DFn, DFd)	P value					One- or two-tailed P value?	Two-tailed		One- or two-tailed P value?	Two-tailed		One- or two-tailed P value?	Two-tailed		One- or two-tailed P value?	Two-tailed		ANOVA table	SS	DF	MS	F (DFn, DFd)	P value						ANOVA table	SS	DF	MS	F (DFn, DFd)	P value
Interaction	0.3627	1	0.3627	F (1, 26) = 1.029	P = 0.3197					Interaction	12.98	1	12.98	F (1, 35) = 28.75	P < 0.0001					t, df	t=6.595, df=46		t, df	t=3.611, df=34		t, df	t=0.3445, df=39		t, df	t=1.755, df=31		Interaction	0.4972	1	0.4972	F (1, 274) = 31.06	P < 0.0001						Interaction	0.05508	1	0.05508	F (1, 266) = 5.211	P = 0.0232
Diet	24.09	1	24.09	F (1, 26) = 68.35	P < 0.0001					Diet	7.046	1	7.046	F (1, 35) = 15.61	P = 0.0004																	Diet	2.267	1	2.267	F (1, 274) = 141.6	P < 0.0001						Diet	1.234	1	1.234	F (1, 266) = 116.8	P < 0.0001
Sex	60.5	1	60.5	F (1, 26) = 171.7	P < 0.0001					Sex	144.5	1	144.5	F (1, 35) = 320.1	P < 0.0001					How big is the difference?			How big is the difference?			How big is the difference?			How big is the difference?			Genotype	2.182	1	2.182	F (1, 274) = 136.3	P < 0.0001						Genotype	0.8105	1	0.8105	F (1, 266) = 76.68	P < 0.0001
Residual	9.162	26	0.3524							Residual	15.8	35	0.4515							Mean of column A	100		Mean of column A	1.603		Mean of column A	100		Mean of column A	1.527		Residual	4.387	274	0.01601								Residual	2.812	266	0.01057
																				Mean of column B	65.17		Mean of column B	1.974		Mean of column B	97.34		Mean of column B	1.716
Number of missing values	10									Number of missing values	5									Difference between means (B - A) ± SEM	-34.83 ± 5.281		Difference between means (B - A) ± SEM	0.3714 ± 0.1028		Difference between means (B - A) ± SEM	-2.660 ± 7.721		Difference between means (B - A) ± SEM	0.1890 ± 0.1077		Number of missing values	30										Number of missing values	34
																				95% confidence interval	-45.46 to -24.20		95% confidence interval	0.1624 to 0.5803		95% confidence interval	-18.28 to 12.96		95% confidence interval	-0.03065 to 0.4086
Compare cell means regardless of rows and columns										Compare cell means regardless of rows and columns										R squared (eta squared)	0.486		R squared (eta squared)	0.2772		R squared (eta squared)	0.003034		R squared (eta squared)	0.09037		Compare cell means regardless of rows and columns											Compare cell means regardless of rows and columns
Number of families	1									Number of families	1									F test to compare variances			F test to compare variances			F test to compare variances			F test to compare variances			Number of families	1										Number of families	1
Number of comparisons per family	6									Number of comparisons per family	6									F, DFn, Dfd	1.076, 23, 23		F, DFn, Dfd	1.820, 17, 17		F, DFn, Dfd	2.710, 20, 19		F, DFn, Dfd	1.053, 14, 17		Number of comparisons per family	6										Number of comparisons per family	6
Alpha	0.05									Alpha	0.05									P value	0.8622		P value	0.2272		P value	0.0342		P value	0.9079		Alpha	0.05										Alpha	0.05
																				P value summary	ns		P value summary	ns		P value summary	*		P value summary	ns
Tukey's multiple comparisons test	Mean Diff.	95% CI of diff.	Significant?	Summary	Adjusted P Value					Tukey's multiple comparisons test	Mean Diff.	95% CI of diff.	Significant?	Summary	Adjusted P Value					Significantly different (P < 0.05)?	No		Significantly different (P < 0.05)?	No		Significantly different (P < 0.05)?	Yes		Significantly different (P < 0.05)?	No		Tukey's multiple comparisons test	Mean Diff.	95% CI of diff.	Significant?	Summary	Adjusted P Value						Tukey's multiple comparisons test	Mean Diff.	95% CI of diff.	Significant?	Summary	Adjusted P Value
0.5x:Female vs. 0.5x:Male	2.667	1.761 to 3.573	Yes	****	< 0.0001					1Y:Female vs. 1Y:Male	2.743	1.850 to 3.636	Yes	****	< 0.0001					Data analyzed			Data analyzed			Data analyzed			Data analyzed			1:w1118 vs. 1:InRE19/+	0.09323	0.03637 to 0.1501	Yes	***	0.0002						1:w1118 vs. 1:InRE19/+	0.08264	0.03878 to 0.1265	Yes	****	< 0.0001
0.5x:Female vs. 1x:Female	-2.048	-2.954 to -1.142	Yes	****	< 0.0001					1Y:Female vs. 2Y:Female	-2.039	-2.915 to -1.163	Yes	****	< 0.0001					Sample size, column A	24		Sample size, column A	18		Sample size, column A	20		Sample size, column A	15		1:w1118 vs. 2:w1118	-0.2669	-0.3239 to -0.2099	Yes	****	< 0.0001						1:w1118 vs. 2:w1118	-0.1671	-0.2108 to -0.1234	Yes	****	< 0.0001
0.5x:Female vs. 1x:Male	1.067	0.2257 to 1.908	Yes	**	0.0091					1Y:Female vs. 2Y:Male	3.052	2.176 to 3.928	Yes	****	< 0.0001					Sample size, column B	24		Sample size, column B	18		Sample size, column B	21		Sample size, column B	18		1:w1118 vs. 2:InRE19/+	-0.003404	-0.06206 to 0.05525	No	ns	0.9988						1:w1118 vs. 2:InRE19/+	-0.02616	-0.07601 to 0.02368	No	ns	0.5275
0.5x:Male vs. 1x:Female	-4.714	-5.585 to -3.844	Yes	****	< 0.0001					1Y:Male vs. 2Y:Female	-4.782	-5.574 to -3.990	Yes	****	< 0.0001																	1:InRE19/+ vs. 2:w1118	-0.3601	-0.4130 to -0.3073	Yes	****	< 0.0001						1:InRE19/+ vs. 2:w1118	-0.2497	-0.2930 to -0.2065	Yes	****	< 0.0001
0.5x:Male vs. 1x:Male	-1.6	-2.403 to -0.7975	Yes	****	< 0.0001					1Y:Male vs. 2Y:Male	0.3091	-0.4827 to 1.101	No	ns	0.7199					Table Analyzed	IIS 2WAY sex:diet											1:InRE19/+ vs. 2:InRE19/+	-0.09664	-0.1513 to -0.04199	Yes	****	< 0.0001						1:InRE19/+ vs. 2:InRE19/+	-0.1088	-0.1583 to -0.05935	Yes	****	< 0.0001
1x:Female vs. 1x:Male	3.114	2.312 to 3.917	Yes	****	< 0.0001					2Y:Female vs. 2Y:Male	5.091	4.318 to 5.864	Yes	****	< 0.0001																	2:w1118 vs. 2:InRE19/+	0.2635	0.2087 to 0.3183	Yes	****	< 0.0001						2:w1118 vs. 2:InRE19/+	0.1409	0.09159 to 0.1902	Yes	****	< 0.0001
																				Two-way ANOVA	Ordinary
																				Alpha	0.05
Test details	Mean 1	Mean 2	Mean Diff.	SE of diff.	N1	N2	q	DF		Test details	Mean 1	Mean 2	Mean Diff.	SE of diff.	N1	N2	q	DF														Test details	Mean 1	Mean 2	Mean Diff.	SE of diff.	N1	N2	q	DF			Test details	Mean 1	Mean 2	Mean Diff.	SE of diff.	N1	N2
																				Source of Variation	% of total variation	P value	P value summary	Significant?
0.5x:Female vs. 0.5x:Male	8.667	6	2.667	0.3303	6	7	11.42	26		1Y:Female vs. 1Y:Male	11.14	8.4	2.743	0.3311	7	10	11.71	35		Interaction	9.606	0.0007	***	Yes								1:w1118 vs. 1:InRE19/+	1.694	1.601	0.09323	0.022	58	77	5.994	274			1:w1118 vs. 1:InRE19/+	1.348	1.265	0.08264	0.01696	72	75
0.5x:Female vs. 1x:Female	8.667	10.71	-2.048	0.3303	6	7	8.768	26		1Y:Female vs. 2Y:Female	11.14	13.18	-2.039	0.3249	7	11	8.876	35		Diet	13.05	<0.0001	****	Yes								1:w1118 vs. 2:w1118	1.694	1.961	-0.2669	0.02206	58	76	17.11	274			1:w1118 vs. 2:w1118	1.348	1.515	-0.1671	0.01691	72	76
0.5x:Female vs. 1x:Male	8.667	7.6	1.067	0.3065	6	10	4.921	26		1Y:Female vs. 2Y:Male	11.14	8.091	3.052	0.3249	7	11	13.29	35		Sex	9.606	0.0007	***	Yes								1:w1118 vs. 2:InRE19/+	1.694	1.697	-0.003404	0.02269	58	67	0.2122	274			1:w1118 vs. 2:InRE19/+	1.348	1.374	-0.02616	0.01928	72	47
0.5x:Male vs. 1x:Female	6	10.71	-4.714	0.3173	7	7	21.01	26		1Y:Male vs. 2Y:Female	8.4	13.18	-4.782	0.2936	10	11	23.03	35														1:InRE19/+ vs. 2:w1118	1.601	1.961	-0.3601	0.02046	77	76	24.89	274			1:InRE19/+ vs. 2:w1118	1.265	1.515	-0.2497	0.01673	75	76
0.5x:Male vs. 1x:Male	6	7.6	-1.6	0.2925	7	10	7.735	26		1Y:Male vs. 2Y:Male	8.4	8.091	0.3091	0.2936	10	11	1.489	35		ANOVA table	SS (Type III)	DF	MS	F (DFn, DFd)	P value							1:InRE19/+ vs. 2:InRE19/+	1.601	1.697	-0.09664	0.02114	77	67	6.465	274			1:InRE19/+ vs. 2:InRE19/+	1.265	1.374	-0.1088	0.01913	75	47
1x:Female vs. 1x:Male	10.71	7.6	3.114	0.2925	7	10	15.06	26		2Y:Female vs. 2Y:Male	13.18	8.091	5.091	0.2865	11	11	25.13	35		Interaction	5720	1	5720	F (1, 85) = 12.40	P=0.0007							2:w1118 vs. 2:InRE19/+	1.961	1.697	0.2635	0.0212	76	67	17.58	274			2:w1118 vs. 2:InRE19/+	1.515	1.374	0.1409	0.01908	76	47
																				Diet	7767	1	7767	F (1, 85) = 16.84	P<0.0001
Table Analyzed	Whole AW plast 1 2																			Sex	5720	1	5720	F (1, 85) = 12.40	P=0.0007							Sex:Diet InRE19/+ F v M
																				Residual	39210	85	461.3									Table Analyzed	InR fvm
Two-way ANOVA	Ordinary
Alpha	0.05																			Difference between column means												Two-way ANOVA	Ordinary
																				Predicted (LS) mean of Female	82.58											Alpha	0.05
Source of Variation	% of total variation	P value	P value summary	Significant?																Predicted (LS) mean of Male	98.67
Interaction	3.754	0.0003	***	Yes																Difference between predicted means	-16.09											Source of Variation	% of total variation	P value	P value summary	Significant?
Diet	8.68	< 0.0001	****	Yes																SE of difference	4.568											Interaction	0.0186	0.7104	ns	No
Sex	69.5	< 0.0001	****	Yes																95% CI of difference	-25.17 to -7.003											Diet	5.302	< 0.0001	****	Yes
																																Sex	54.5	< 0.0001	****	Yes
ANOVA table	SS	DF	MS	F (DFn, DFd)	P value															Difference between row means
Interaction	8.373	1	8.373	F (1, 35) = 16.61	P = 0.0003															Predicted (LS) mean of 1Y	100											ANOVA table	SS	DF	MS	F (DFn, DFd)	P value
Diet	19.36	1	19.36	F (1, 35) = 38.40	P < 0.0001															Predicted (LS) mean of 2Y	81.25											Interaction	0.002368	1	0.002368	F (1, 262) = 0.1382	P = 0.7104
Sex	155	1	155	F (1, 35) = 307.5	P < 0.0001															Difference between predicted means	18.75											Diet	0.675	1	0.675	F (1, 262) = 39.40	P < 0.0001
Residual	17.65	35	0.5042																	SE of difference	4.568											Sex	6.939	1	6.939	F (1, 262) = 405.0	P < 0.0001
																				95% CI of difference	9.662 to 27.83											Residual	4.489	262	0.01713
Number of missing values	5
																				Interaction CI												Number of missing values	42
Compare cell means regardless of rows and columns																				Mean diff, A1 - B1	4.667e-06
																				Mean diff, A2 - B2	-32.17											Compare cell means regardless of rows and columns
Number of families	1																			(A1 -B1) - (A2 - B2)	32.17
Number of comparisons per family	6																			95% CI of difference	14.01 to 50.34											Number of families	1
Alpha	0.05																			(B1 - A1) - (B2 - A2)	-32.17											Number of comparisons per family	6
																				95% CI of difference	-50.34 to -14.01											Alpha	0.05
Tukey's multiple comparisons test	Mean Diff.	95% CI of diff.	Significant?	Summary	Adjusted P Value
																				Data summary												Tukey's multiple comparisons test	Mean Diff.	95% CI of diff.	Significant?	Summary	Adjusted P Value
1x:Female vs. 1x:Male	3.114	2.171 to 4.058	Yes	****	< 0.0001															Number of columns (Sex)	2
1x:Female vs. 2x:Female	-2.377	-3.303 to -1.451	Yes	****	< 0.0001															Number of rows (Diet)	2											1Y:F InRE19/+ vs. 1Y:M InRE19/+	0.3354	0.2805 to 0.3903	Yes	****	< 0.0001
1x:Female vs. 2x:Male	2.623	1.697 to 3.549	Yes	****	< 0.0001															Number of values	89											1Y:F InRE19/+ vs. 2Y:F InRE19/+	-0.09664	-0.1532 to -0.04009	Yes	****	< 0.0001
1x:Male vs. 2x:Female	-5.491	-6.328 to -4.654	Yes	****	< 0.0001																											1Y:F InRE19/+ vs. 2Y:M InRE19/+	0.2266	0.1640 to 0.2893	Yes	****	< 0.0001
1x:Male vs. 2x:Male	-0.4909	-1.328 to 0.3458	No	ns	0.4015																											1Y:M InRE19/+ vs. 2Y:F InRE19/+	-0.4321	-0.4889 to -0.3752	Yes	****	< 0.0001
2x:Female vs. 2x:Male	5	4.183 to 5.817	Yes	****	< 0.0001																											1Y:M InRE19/+ vs. 2Y:M InRE19/+	-0.1088	-0.1718 to -0.04584	Yes	****	< 0.0001
																																2Y:F InRE19/+ vs. 2Y:M InRE19/+	0.3233	0.2589 to 0.3876	Yes	****	< 0.0001
Test details	Mean 1	Mean 2	Mean Diff.	SE of diff.	N1	N2	q	DF
																																Test details	Mean 1	Mean 2	Mean Diff.	SE of diff.	N1	N2	q	DF
1x:Female vs. 1x:Male	10.71	7.6	3.114	0.3499	7	10	12.59	35
1x:Female vs. 2x:Female	10.71	13.09	-2.377	0.3433	7	11	9.79	35																								1Y:F InRE19/+ vs. 1Y:M InRE19/+	1.601	1.265	0.3354	0.02124	77	75	22.34	262
1x:Female vs. 2x:Male	10.71	8.091	2.623	0.3433	7	11	10.81	35																								1Y:F InRE19/+ vs. 2Y:F InRE19/+	1.601	1.697	-0.09664	0.02187	77	67	6.249	262
1x:Male vs. 2x:Female	7.6	13.09	-5.491	0.3102	10	11	25.03	35																								1Y:F InRE19/+ vs. 2Y:M InRE19/+	1.601	1.374	0.2266	0.02423	77	47	13.23	262
1x:Male vs. 2x:Male	7.6	8.091	-0.4909	0.3102	10	11	2.238	35																								1Y:M InRE19/+ vs. 2Y:F InRE19/+	1.265	1.697	-0.4321	0.022	75	67	27.77	262
2x:Female vs. 2x:Male	13.09	8.091	5	0.3028	11	11	23.35	35																								1Y:M InRE19/+ vs. 2Y:M InRE19/+	1.265	1.374	-0.1088	0.02435	75	47	6.319	262
																																2Y:F InRE19/+ vs. 2Y:M InRE19/+	1.697	1.374	0.3233	0.02491	67	47	18.36	262
																																Table Analyzed	w1118 control FvM
																																Two-way ANOVA	Ordinary
																																Alpha	0.05
																																Source of Variation	% of total variation	P value	P value summary	Significant?
																																Interaction	0.964	< 0.0001	****	Yes
																																Diet	18.22	< 0.0001	****	Yes
																																Sex	60.64	< 0.0001	****	Yes
																																ANOVA table	SS	DF	MS	F (DFn, DFd)	P value
																																Interaction	0.1735	1	0.1735	F (1, 278) = 17.80	P < 0.0001
																																Diet	3.279	1	3.279	F (1, 278) = 336.4	P < 0.0001
																																Sex	10.92	1	10.92	F (1, 278) = 1120	P < 0.0001
																																Residual	2.709	278	0.009746
																																Number of missing values	22
																																Compare cell means regardless of rows and columns
																																Number of families	1
																																Number of comparisons per family	6
																																Alpha	0.05
																																Tukey's multiple comparisons test	Mean Diff.	95% CI of diff.	Significant?	Summary	Adjusted P Value
																																1Y:Female w1118 vs. 1Y:Male w1118	0.346	0.3010 to 0.3910	Yes	****	< 0.0001
																																1Y:Female w1118 vs. 2Y:Female w1118	-0.2669	-0.3114 to -0.2224	Yes	****	< 0.0001
																																1Y:Female w1118 vs. 2Y:Male w1118	0.1789	0.1344 to 0.2234	Yes	****	< 0.0001
																																1Y:Male w1118 vs. 2Y:Female w1118	-0.6129	-0.6549 to -0.5710	Yes	****	< 0.0001
																																1Y:Male w1118 vs. 2Y:Male w1118	-0.1671	-0.2090 to -0.1251	Yes	****	< 0.0001
																																2Y:Female w1118 vs. 2Y:Male w1118	0.4458	0.4045 to 0.4872	Yes	****	< 0.0001
																																Test details	Mean 1	Mean 2	Mean Diff.	SE of diff.	N1	N2	q	DF
																																1Y:Female w1118 vs. 1Y:Male w1118	1.694	1.348	0.346	0.01742	58	72	28.09	278
																																1Y:Female w1118 vs. 2Y:Female w1118	1.694	1.961	-0.2669	0.01721	58	76	21.93	278
																																1Y:Female w1118 vs. 2Y:Male w1118	1.694	1.515	0.1789	0.01721	58	76	14.7	278
																																1Y:Male w1118 vs. 2Y:Female w1118	1.348	1.961	-0.6129	0.01624	72	76	53.39	278
																																1Y:Male w1118 vs. 2Y:Male w1118	1.348	1.515	-0.1671	0.01624	72	76	14.55	278
																																2Y:Female w1118 vs. 2Y:Male w1118	1.961	1.515	0.4458	0.01601	76	76	39.37	278
[truncated: 2 more columns]

## Sheet: Figure 2
A						B						C										D
Table Analyzed	F IIS Agg ilp2 mut plast		Table Analyzed	F IIS Agg ilp2 mut plast		Table Analyzed	M IIS Agg ilp2 mut plast		Table Analyzed	M IIS Agg ilp2 mut plast		Table Analyzed	F ilp2 AW plast									Table Analyzed	M ilp2 AW plast										Table Analyzed	dilp2 ctrl FvM									Table Analyzed	dilp2 expt FvM
Column B	w 2Y		Column D	ilp2 2Y		Column B	w 2Y		Column D	ilp2 2Y		Two-way ANOVA	Ordinary									Two-way ANOVA	Ordinary										Two-way ANOVA	Ordinary									Two-way ANOVA	Ordinary
vs.	vs.		vs.	vs.		vs.	vs.		vs.	vs.		Alpha	0.05									Alpha	0.05										Alpha	0.05									Alpha	0.05
Column A	w 1Y		Column C	ilp2 1Y		Column A	w 1Y		Column C	ilp2 1Y
												Source of Variation	% of total variation	P value	P value summary	Significant?						Source of Variation	% of total variation	P value	P value summary	Significant?							Source of Variation	% of total variation	P value	P value summary	Significant?						Source of Variation	% of total variation	P value	P value summary	Significant?
Unpaired t test			Unpaired t test			Unpaired t test			Unpaired t test			Interaction	6.914	0.0024	**	Yes						Interaction	0.01623	0.935	ns	No							Interaction	6.456	< 0.0001	****	Yes						Interaction	2.137	0.0827	ns	No
P value	<0.0001		P value	0.2231		P value	0.0066		P value	0.0023		Diet	26.43	< 0.0001	****	Yes						Diet	2.99	0.2724	ns	No							Diet	3.504	0.0004	***	Yes						Diet	0.384	0.4545	ns	No
P value summary	****		P value summary	ns		P value summary	**		P value summary	**		Genotype	36.39	< 0.0001	****	Yes						Genotype	2.804	0.2876	ns	No							Sex	71.87	< 0.0001	****	Yes						Sex	68.1	< 0.0001	****	Yes
Significantly different (P < 0.05)?	Yes		Significantly different (P < 0.05)?	No		Significantly different (P < 0.05)?	Yes		Significantly different (P < 0.05)?	Yes
One- or two-tailed P value?	Two-tailed		One- or two-tailed P value?	Two-tailed		One- or two-tailed P value?	Two-tailed		One- or two-tailed P value?	Two-tailed		ANOVA table	SS	DF	MS	F (DFn, DFd)	P value					ANOVA table	SS	DF	MS	F (DFn, DFd)	P value						ANOVA table	SS	DF	MS	F (DFn, DFd)	P value					ANOVA table	SS	DF	MS	F (DFn, DFd)	P value
t, df	t=6.766, df=46		t, df	t=1.235, df=46		t, df	t=2.854, df=43		t, df	t=3.252, df=41		Interaction	4.234	1	4.234	F (1, 33) = 10.83	P = 0.0024					Interaction	0.004809	1	0.004809	F (1, 39) = 0.006728	P = 0.9350						Interaction	12.98	1	12.98	F (1, 35) = 28.75	P < 0.0001					Interaction	2.147	1	2.147	F (1, 37) = 3.180	P = 0.0827
												Diet	16.19	1	16.19	F (1, 33) = 41.40	P < 0.0001					Diet	0.8858	1	0.8858	F (1, 39) = 1.239	P = 0.2724						Diet	7.046	1	7.046	F (1, 35) = 15.61	P = 0.0004					Diet	0.3857	1	0.3857	F (1, 37) = 0.5714	P = 0.4545
How big is the difference?			How big is the difference?			How big is the difference?			How big is the difference?			Genotype	22.28	1	22.28	F (1, 33) = 57.00	P < 0.0001					Genotype	0.8307	1	0.8307	F (1, 39) = 1.162	P = 0.2876						Sex	144.5	1	144.5	F (1, 35) = 320.1	P < 0.0001					Sex	68.4	1	68.4	F (1, 37) = 101.3	P < 0.0001
Mean of column A	100		Mean of column C	100		Mean of column A	100		Mean of column C	100		Residual	12.9	33	0.391							Residual	27.88	39	0.7148								Residual	15.8	35	0.4515							Residual	24.98	37	0.675
Mean of column B	57.48		Mean of column D	80.89		Mean of column B	77.36		Mean of column D	73.25
Difference between means (B - A) ± SEM	-42.52 ± 6.283		Difference between means (D - C) ± SEM	-19.11 ± 15.48		Difference between means (B - A) ± SEM	-22.64 ± 7.932		Difference between means (D - C) ± SEM	-26.75 ± 8.225		Number of missing values	7									Number of missing values	5										Compare cell means regardless of rows and columns										Compare cell means regardless of rows and columns
95% confidence interval	-55.16 to -29.87		95% confidence interval	-50.26 to 12.04		95% confidence interval	-38.63 to -6.641		95% confidence interval	-43.36 to -10.13
R squared (eta squared)	0.4988		R squared (eta squared)	0.0321		R squared (eta squared)	0.1593		R squared (eta squared)	0.205		Compare cell means regardless of rows and columns										Compare cell means regardless of rows and columns											Number of families	1									Number of families	1
																																	Number of comparisons per family	6									Number of comparisons per family	6
F test to compare variances			F test to compare variances			F test to compare variances			F test to compare variances			Number of families	1									Number of families	1										Alpha	0.05									Alpha	0.05
F, DFn, Dfd	1.084, 23, 23		F, DFn, Dfd	3.004, 23, 23		F, DFn, Dfd	1.096, 23, 20		F, DFn, Dfd	2.209, 23, 18		Number of comparisons per family	6									Number of comparisons per family	6
P value	0.8484		P value	0.0108		P value	0.8428		P value	0.0905		Alpha	0.05									Alpha	0.05										Tukey's multiple comparisons test	Mean Diff.	95% CI of diff.	Significant?	Summary	Adjusted P Value					Tukey's multiple comparisons test	Mean Diff.	95% CI of diff.	Significant?	Summary	Adjusted P Value
P value summary	ns		P value summary	*		P value summary	ns		P value summary	ns
Significantly different (P < 0.05)?	No		Significantly different (P < 0.05)?	Yes		Significantly different (P < 0.05)?	No		Significantly different (P < 0.05)?	No		Tukey's multiple comparisons test	Mean Diff.	95% CI of diff.	Significant?	Summary	Adjusted P Value					Tukey's multiple comparisons test	Mean Diff.	95% CI of diff.	Significant?	Summary	Adjusted P Value						1Y:Female w vs. 1Y:Male w1118	2.743	1.850 to 3.636	Yes	****	< 0.0001					1Y:F dilp2 vs. 1Y:M dilp2	2.15	1.102 to 3.198	Yes	****	< 0.0001
																																	1Y:Female w vs. 2Y:Female w	-2.039	-2.915 to -1.163	Yes	****	< 0.0001					1Y:F dilp2 vs. 2Y:F dilp2	-0.6591	-1.686 to 0.3678	No	ns	0.3249
Data analyzed			Data analyzed			Data analyzed			Data analyzed			1Y:w1118 vs. 1Y:ilp2	0.8929	0.01749 to 1.768	Yes	*	0.0442					1Y:w1118 vs. 1Y:ilp2	0.3	-0.7146 to 1.315	No	ns	0.857						1Y:Female w vs. 2Y:Male w1118	3.052	2.176 to 3.928	Yes	****	< 0.0001					1Y:F dilp2 vs. 2Y:M dilp2	2.417	1.408 to 3.425	Yes	****	< 0.0001
Sample size, column A	24		Sample size, column C	24		Sample size, column A	21		Sample size, column C	19		1Y:w1118 vs. 2Y:w1118	-2.039	-2.857 to -1.221	Yes	****	< 0.0001					1Y:w1118 vs. 2Y:w1118	0.3091	-0.6821 to 1.300	No	ns	0.8366						1Y:Male w1118 vs. 2Y:Female w	-4.782	-5.574 to -3.990	Yes	****	< 0.0001					1Y:M dilp2 vs. 2Y:F dilp2	-2.809	-3.775 to -1.844	Yes	****	< 0.0001
Sample size, column B	24		Sample size, column D	24		Sample size, column B	24		Sample size, column D	24		1Y:w1118 vs. 2Y:ilp2	0.2338	-0.5840 to 1.052	No	ns	0.8659					1Y:w1118 vs. 2Y:ilp2	0.5667	-0.4047 to 1.538	No	ns	0.4097						1Y:Male w1118 vs. 2Y:Male w1118	0.3091	-0.4827 to 1.101	No	ns	0.7199					1Y:M dilp2 vs. 2Y:M dilp2	0.2667	-0.6796 to 1.213	No	ns	0.8726
												1Y:ilp2 vs. 2Y:w1118	-2.932	-3.718 to -2.146	Yes	****	< 0.0001					1Y:ilp2 vs. 2Y:w1118	0.009091	-0.9821 to 1.000	No	ns	> 0.9999						2Y:Female w vs. 2Y:Male w1118	5.091	4.318 to 5.864	Yes	****	< 0.0001					2Y:F dilp2 vs. 2Y:M dilp2	3.076	2.153 to 3.998	Yes	****	< 0.0001
Table Analyzed	2way IIS agg w1118 sex:diet											1Y:ilp2 vs. 2Y:ilp2	-0.6591	-1.445 to 0.1268	No	ns	0.1263					1Y:ilp2 vs. 2Y:ilp2	0.2667	-0.7047 to 1.238	No	ns	0.8817
												2Y:w1118 vs. 2Y:ilp2	2.273	1.552 to 2.994	Yes	****	< 0.0001					2Y:w1118 vs. 2Y:ilp2	0.2576	-0.6894 to 1.205	No	ns	0.8845
Two-way ANOVA	Ordinary																																Test details	Mean 1	Mean 2	Mean Diff.	SE of diff.	N1	N2	q	DF		Test details	Mean 1	Mean 2	Mean Diff.	SE of diff.	N1	N2
Alpha	0.05
												Test details	Mean 1	Mean 2	Mean Diff.	SE of diff.	N1	N2	q	DF		Test details	Mean 1	Mean 2	Mean Diff.	SE of diff.	N1	N2	q	DF			1Y:Female w vs. 1Y:Male w1118	11.14	8.4	2.743	0.3311	7	10	11.71	35		1Y:F dilp2 vs. 1Y:M dilp2	10.25	8.1	2.15	0.3897	8	10
Source of Variation	% of total variation	P value	P value summary	Significant?																													1Y:Female w vs. 2Y:Female w	11.14	13.18	-2.039	0.3249	7	11	8.876	35		1Y:F dilp2 vs. 2Y:F dilp2	10.25	10.91	-0.6591	0.3818	8	11
Interaction	2.809	0.0511	ns	No								1Y:w1118 vs. 1Y:ilp2	11.14	10.25	0.8929	0.3236	7	8	3.902	33		1Y:w1118 vs. 1Y:ilp2	8.4	8.1	0.3	0.3781	10	10	1.122	39			1Y:Female w vs. 2Y:Male w1118	11.14	8.091	3.052	0.3249	7	11	13.29	35		1Y:F dilp2 vs. 2Y:M dilp2	10.25	7.833	2.417	0.375	8	12
Diet	30.18	<0.0001	****	Yes								1Y:w1118 vs. 2Y:w1118	11.14	13.18	-2.039	0.3023	7	11	9.538	33		1Y:w1118 vs. 2Y:w1118	8.4	8.091	0.3091	0.3694	10	11	1.183	39			1Y:Male w1118 vs. 2Y:Female w	8.4	13.18	-4.782	0.2936	10	11	23.03	35		1Y:M dilp2 vs. 2Y:F dilp2	8.1	10.91	-2.809	0.359	10	11
Sex	2.809	0.0511	ns	No								1Y:w1118 vs. 2Y:ilp2	11.14	10.91	0.2338	0.3023	7	11	1.094	33		1Y:w1118 vs. 2Y:ilp2	8.4	7.833	0.5667	0.362	10	12	2.214	39			1Y:Male w1118 vs. 2Y:Male w1118	8.4	8.091	0.3091	0.2936	10	11	1.489	35		1Y:M dilp2 vs. 2Y:M dilp2	8.1	7.833	0.2667	0.3518	10	12
												1Y:ilp2 vs. 2Y:w1118	10.25	13.18	-2.932	0.2905	8	11	14.27	33		1Y:ilp2 vs. 2Y:w1118	8.1	8.091	0.009091	0.3694	10	11	0.0348	39			2Y:Female w vs. 2Y:Male w1118	13.18	8.091	5.091	0.2865	11	11	25.13	35		2Y:F dilp2 vs. 2Y:M dilp2	10.91	7.833	3.076	0.343	11	12
ANOVA table	SS (Type III)	DF	MS	F (DFn, DFd)	P value							1Y:ilp2 vs. 2Y:ilp2	10.25	10.91	-0.6591	0.2905	8	11	3.208	33		1Y:ilp2 vs. 2Y:ilp2	8.1	7.833	0.2667	0.362	10	12	1.042	39
Interaction	2289	1	2289	F (1, 89) = 3.911	P=0.0511							2Y:w1118 vs. 2Y:ilp2	13.18	10.91	2.273	0.2666	11	11	12.05	33		2Y:w1118 vs. 2Y:ilp2	8.091	7.833	0.2576	0.3529	11	12	1.032	39
Diet	24592	1	24592	F (1, 89) = 42.01	P<0.0001
Sex	2289	1	2289	F (1, 89) = 3.911	P=0.0511
Residual	52095	89	585.3
Difference between column means
Predicted (LS) mean of Female	78.74
Predicted (LS) mean of Male	88.68
Difference between predicted means	-9.939
SE of difference	5.026
95% CI of difference	-19.93 to 0.04743
Difference between row means
Predicted (LS) mean of 1Y	100
Predicted (LS) mean of 2Y	67.42
Difference between predicted means	32.58
SE of difference	5.026
95% CI of difference	22.59 to 42.56
Interaction CI
Mean diff, A1 - B1	-1.28e-05
Mean diff, A2 - B2	-19.88
(A1 -B1) - (A2 - B2)	19.88
95% CI of difference	-0.09489 to 39.85
(B1 - A1) - (B2 - A2)	-19.88
95% CI of difference	-39.85 to 0.09489
Table Analyzed	F IIS sex by diet dilp2
Two-way ANOVA	Ordinary
Alpha	0.05
Source of Variation	% of total variation	P value	P value summary	Significant?
Interaction	0.1882	0.6754	ns	No
Diet	6.795	0.0134	*	Yes
Sex	0.1882	0.6754	ns	No
ANOVA table	SS (Type III)	DF	MS	F (DFn, DFd)	P value
Interaction	327.9	1	327.9	F (1, 87) = 0.1765	P=0.6754
Diet	11840	1	11840	F (1, 87) = 6.374	P=0.0134
Sex	327.9	1	327.9	F (1, 87) = 0.1765	P=0.6754
Residual	161610	87	1858
Difference between column means
Predicted (LS) mean of Females	90.44
Predicted (LS) mean of Males	86.63
Difference between predicted means	3.816
SE of difference	9.082
95% CI of difference	-14.24 to 21.87
Difference between row means
Predicted (LS) mean of 1Y	100
Predicted (LS) mean of 2Y	77.07
Difference between predicted means	22.93
SE of difference	9.082
95% CI of difference	4.877 to 40.98
Interaction CI
Mean diff, A1 - B1	-4.123e-06
Mean diff, A2 - B2	7.632
(A1 -B1) - (A2 - B2)	-7.632
95% CI of difference	-43.74 to 28.47
(B1 - A1) - (B2 - A2)	7.632
95% CI of difference	-28.47 to 43.74
[truncated: 26 more columns]

## Sheet: Figure 3
A						B												C						D												E									F
Table Analyzed	F sun 1Y 2Y sunA		Table Analyzed	F sun 1Y 2Y sunB		Table Analyzed	F norm other F2B		Table Analyzed	F norm other F2B		Table Analyzed	F norm other F2B		Table Analyzed	F norm other F2B		Table Analyzed	M sun 1Y 2Y sunA		Table Analyzed	M sun 1Y 2Y sunB		Table Analyzed	M F norm other F2B		Table Analyzed	M F norm other F2B		Table Analyzed	M F norm other F2B		Table Analyzed	M F norm other F2B		Table Analyzed	F r4>sunRNAi IIS Agg mRNA		Table Analyzed	F r4>sunRNAi IIS Agg mRNA		Table Analyzed	F r4>sunRNAi IIS Agg mRNA		Table Analyzed	M r4>sunRNAi IIS Agg mRNA		Table Analyzed	M r4>sunRNAi IIS Agg mRNA
Column B	2Y		Column D	2Y		Column B	F Gbp1 2Y		Column D	F Gbp2 2Y		Column F	F CCHa2 2Y		Column H	F upd2 2Y		Column B	2Y		Column D	2Y		Column B	M Gbp1 2Y		Column D	M Gbp2 2Y		Column F	M CCHa2 2Y		Column H	M upd2 2Y		Column B	r4>+ 2Y IIS		Column D	+>sun-RNAi 2Y IIS		Column F	r4>sun-RNAi 2Y IIS		Column B	r4>+ 2Y IIS		Column D	+>sun-RNAi 2Y IIS
vs.	vs.		vs.	vs.		vs.	vs.		vs.	vs.		vs.	vs.		vs.	vs.		vs.	vs.		vs.	vs.		vs.	vs.		vs.	vs.		vs.	vs.		vs.	vs.		vs.	vs.		vs.	vs.		vs.	vs.		vs.	vs.		vs.	vs.
Column A	1Y		Column C	1Y		Column A	F Gbp1 1Y		Column C	F Gbp2 1Y		Column E	F CCHa2 1Y		Column G	F upd2 1Y		Column A	1Y		Column C	1Y		Column A	M Gbp1 Y		Column C	M Gbp2 1Y		Column E	M CCHa2 1Y		Column G	M upd2 1Y		Column A	r4>+ 1Y IIS		Column C	+>sun-RNAi 1Y IIS		Column E	r4>sun-RNAi 1Y IIS		Column A	r4>+ 1Y IIS		Column C	+>sun-RNAi 1Y IIS
Unpaired t test			Unpaired t test			Unpaired t test			Unpaired t test			Unpaired t test			Unpaired t test			Unpaired t test			Unpaired t test			Unpaired t test			Unpaired t test			Unpaired t test			Unpaired t test			Unpaired t test			Unpaired t test			Unpaired t test			Unpaired t test			Unpaired t test
P value	0.0055		P value	0.2327		P value	0.0245		P value	0.0662		P value	0.1416		P value	0.7171		P value	0.5832		P value	0.2017		P value	0.1487		P value	0.0214		P value	0.0272		P value	0.1686		P value	<0.0001		P value	<0.0001		P value	0.2792		P value	<0.0001		P value	0.0001
P value summary	**		P value summary	ns		P value summary	*		P value summary	ns		P value summary	ns		P value summary	ns		P value summary	ns		P value summary	ns		P value summary	ns		P value summary	*		P value summary	*		P value summary	ns		P value summary	****		P value summary	****		P value summary	ns		P value summary	****		P value summary	***
Significantly different? (P < 0.05)	Yes		Significantly different? (P < 0.05)	No		Significantly different? (P < 0.05)	Yes		Significantly different? (P < 0.05)	No		Significantly different? (P < 0.05)	No		Significantly different? (P < 0.05)	No		Significantly different? (P < 0.05)	No		Significantly different? (P < 0.05)	No		Significantly different? (P < 0.05)	No		Significantly different? (P < 0.05)	Yes		Significantly different? (P < 0.05)	Yes		Significantly different? (P < 0.05)	No		Significantly different (P < 0.05)?	Yes		Significantly different (P < 0.05)?	Yes		Significantly different (P < 0.05)?	No		Significantly different (P < 0.05)?	Yes		Significantly different (P < 0.05)?	Yes
One- or two-tailed P value?	Two-tailed		One- or two-tailed P value?	Two-tailed		One- or two-tailed P value?	Two-tailed		One- or two-tailed P value?	Two-tailed		One- or two-tailed P value?	Two-tailed		One- or two-tailed P value?	Two-tailed		One- or two-tailed P value?	Two-tailed		One- or two-tailed P value?	Two-tailed		One- or two-tailed P value?	Two-tailed		One- or two-tailed P value?	Two-tailed		One- or two-tailed P value?	Two-tailed		One- or two-tailed P value?	Two-tailed		One- or two-tailed P value?	Two-tailed		One- or two-tailed P value?	Two-tailed		One- or two-tailed P value?	Two-tailed		One- or two-tailed P value?	Two-tailed		One- or two-tailed P value?	Two-tailed
t, df	t=3.281 df=14		t, df	t=1.247 df=14		t, df	t=2.543 df=13		t, df	t=1.992 df=14		t, df	t=1.558 df=14		t, df	t=0.3698 df=14		t, df	t=0.5627 df=13		t, df	t=1.345 df=13		t, df	t=1.535 df=13		t, df	t=2.615 df=13		t, df	t=2.488 df=13		t, df	t=1.458 df=13		t, df	t=7.112, df=46		t, df	t=6.739, df=46		t, df	t=1.095, df=46		t, df	t=5.159, df=43		t, df	t=4.188, df=43
How big is the difference?			How big is the difference?			How big is the difference?			How big is the difference?			How big is the difference?			How big is the difference?			How big is the difference?			How big is the difference?			How big is the difference?			How big is the difference?			How big is the difference?			How big is the difference?			How big is the difference?			How big is the difference?			How big is the difference?			How big is the difference?			How big is the difference?
Mean ± SEM of column A	100.0 ± 6.462, n=8		Mean ± SEM of column C	100.0 ± 5.383, n=8		Mean ± SEM of column A	100.0 ± 6.229, n=8		Mean ± SEM of column C	100.0 ± 3.883, n=8		Mean ± SEM of column E	100.0 ± 7.418, n=8		Mean ± SEM of column G	100.0 ± 17.84, n=8		Mean ± SEM of column A	95.32 ± 6.972, n=7		Mean ± SEM of column C	101.6 ± 5.414, n=7		Mean ± SEM of column A	91.68 ± 9.404, n=7		Mean ± SEM of column C	98.82 ± 11.38, n=7		Mean ± SEM of column E	113.0 ± 2.907, n=7		Mean ± SEM of column G	194.5 ± 33.99, n=7		Mean of column A	100		Mean of column C	100		Mean of column E	100		Mean of column A	100		Mean of column C	100
Mean ± SEM of column B	126.2 ± 4.679, n=8		Mean ± SEM of column D	109.5 ± 5.414, n=8		Mean ± SEM of column B	79.86 ± 4.550, n=7		Mean ± SEM of column D	77.51 ± 10.60, n=8		Mean ± SEM of column F	74.74 ± 14.42, n=8		Mean ± SEM of column H	91.23 ± 15.64, n=8		Mean ± SEM of column B	99.20 ± 2.208, n=8		Mean ± SEM of column D	93.19 ± 3.399, n=8		Mean ± SEM of column B	76.17 ± 4.701, n=8		Mean ± SEM of column D	68.56 ± 4.358, n=8		Mean ± SEM of column F	88.20 ± 8.924, n=8		Mean ± SEM of column H	113.7 ± 42.36, n=8		Mean of column B	54.14		Mean of column D	50.42		Mean of column F	108.2		Mean of column B	74.25		Mean of column D	74.96
Difference between means	26.18 ± 7.979		Difference between means	9.524 ± 7.634		Difference between means	-20.14 ± 7.917		Difference between means	-22.49 ± 11.29		Difference between means	-25.26 ± 16.21		Difference between means	-8.771 ± 23.72		Difference between means	3.886 ± 6.906		Difference between means	-8.365 ± 6.220		Difference between means	-15.51 ± 10.10		Difference between means	-30.26 ± 11.57		Difference between means	-24.79 ± 9.960		Difference between means	-80.79 ± 55.41		Difference between means (B - A) ± SEM	-45.86 ± 6.448		Difference between means (D - C) ± SEM	-49.58 ± 7.357		Difference between means (F - E) ± SEM	8.152 ± 7.445		Difference between means (B - A) ± SEM	-25.75 ± 4.991		Difference between means (D - C) ± SEM	-25.04 ± 5.978
95% confidence interval	9.068 to 43.29		95% confidence interval	-6.850 to 25.90		95% confidence interval	-37.24 to -3.033		95% confidence interval	-46.71 to 1.720		95% confidence interval	-60.03 to 9.519		95% confidence interval	-59.65 to 42.11		95% confidence interval	-11.03 to 18.80		95% confidence interval	-21.80 to 5.073		95% confidence interval	-37.33 to 6.313		95% confidence interval	-55.26 to -5.264		95% confidence interval	-46.30 to -3.268		95% confidence interval	-200.5 to 38.92		95% confidence interval	-58.84 to -32.88		95% confidence interval	-64.39 to -34.77		95% confidence interval	-6.833 to 23.14		95% confidence interval	-35.81 to -15.68		95% confidence interval	-37.09 to -12.98
R squared	0.4347		R squared	0.1		R squared	0.3323		R squared	0.2209		R squared	0.1477		R squared	0.009672		R squared	0.02377		R squared	0.1221		R squared	0.1535		R squared	0.3447		R squared	0.3227		R squared	0.1405		R squared (eta squared)	0.5237		R squared (eta squared)	0.4968		R squared (eta squared)	0.02541		R squared (eta squared)	0.3823		R squared (eta squared)	0.2897
F test to compare variances			F test to compare variances			F test to compare variances			F test to compare variances			F test to compare variances			F test to compare variances			F test to compare variances			F test to compare variances			F test to compare variances			F test to compare variances			F test to compare variances			F test to compare variances			F test to compare variances			F test to compare variances			F test to compare variances			F test to compare variances			F test to compare variances
F,DFn, Dfd	1.907, 7, 7		F,DFn, Dfd	1.011, 7, 7		F,DFn, Dfd	2.142, 7, 6		F,DFn, Dfd	7.455, 7, 7		F,DFn, Dfd	3.777, 7, 7		F,DFn, Dfd	1.302, 7, 7		F,DFn, Dfd	8.721, 6, 7		F,DFn, Dfd	2.220, 6, 7		F,DFn, Dfd	3.502, 6, 7		F,DFn, Dfd	5.962, 6, 7		F,DFn, Dfd	10.77, 7, 6		F,DFn, Dfd	1.775, 7, 6		F, DFn, Dfd	1.667, 23, 23		F, DFn, Dfd	1.709, 23, 23		F, DFn, Dfd	1.651, 23, 23		F, DFn, Dfd	2.152, 23, 20		F, DFn, Dfd	4.709, 20, 23
P value	0.4137		P value	0.9885		P value	0.3723		P value	0.0167		P value	0.1006		P value	0.7368		P value	0.0115		P value	0.3204		P value	0.1257		P value	0.0335		P value	0.01		P value	0.5015		P value	0.2279		P value	0.2061		P value	0.2366		P value	0.0878		P value	0.0006
P value summary	ns		P value summary	ns		P value summary	ns		P value summary	*		P value summary	ns		P value summary	ns		P value summary	*		P value summary	ns		P value summary	ns		P value summary	*		P value summary	*		P value summary	ns		P value summary	ns		P value summary	ns		P value summary	ns		P value summary	ns		P value summary	***
Significantly different? (P < 0.05)	No		Significantly different? (P < 0.05)	No		Significantly different? (P < 0.05)	No		Significantly different? (P < 0.05)	Yes		Significantly different? (P < 0.05)	No		Significantly different? (P < 0.05)	No		Significantly different? (P < 0.05)	Yes		Significantly different? (P < 0.05)	No		Significantly different? (P < 0.05)	No		Significantly different? (P < 0.05)	Yes		Significantly different? (P < 0.05)	Yes		Significantly different? (P < 0.05)	No		Significantly different (P < 0.05)?	No		Significantly different (P < 0.05)?	No		Significantly different (P < 0.05)?	No		Significantly different (P < 0.05)?	No		Significantly different (P < 0.05)?	Yes
																																				Table Analyzed	Female geno:diet 2way agg IIS								Table Analyzed	Male geno:diet 2way agg IIS
																																				Two-way ANOVA	Ordinary								Two-way ANOVA	Ordinary
																																				Alpha	0.05								Alpha	0.05
																																				Source of Variation	% of total variation	P value	P value summary	Significant?					Source of Variation	% of total variation	P value	P value summary	Significant?
																																				Interaction	15.28	<0.0001	****	Yes					Interaction	2.678	0.1068	ns	No
																																				Diet	18.58	<0.0001	****	Yes					Diet	17.25	<0.0001	****	Yes
																																				Genotype	15.28	<0.0001	****	Yes					Genotype	2.678	0.1068	ns	No
																																				ANOVA table	SS (Type III)	DF	MS	F (DFn, DFd)	P value				ANOVA table	SS (Type III)	DF	MS	F (DFn, DFd)
																																				Interaction	25056	2	12528	F (2, 138) = 20.73	P<0.0001				Interaction	2115	2	1057	F (2, 132) = 2.275
																																				Diet	30475	1	30475	F (1, 138) = 50.42	P<0.0001				Diet	13625	1	13625	F (1, 132) = 29.31
																																				Genotype	25056	2	12528	F (2, 138) = 20.73	P<0.0001				Genotype	2115	2	1057	F (2, 132) = 2.275
																																				Residual	83416	138	604.5						Residual	61361	132	464.9
																																				Difference between row means									Difference between row means
																																				Predicted (LS) mean of 1Y	100								Predicted (LS) mean of 1Y	100
																																				Predicted (LS) mean of 2Y	70.9								Predicted (LS) mean of 2Y	80.09
																																				Difference between predicted means	29.1								Difference between predicted means	19.91
																																				SE of difference	4.098								SE of difference	3.678
																																				95% CI of difference	20.99 to 37.20								95% CI of difference	12.64 to 27.19
																																				Data summary									Data summary
																																				Number of columns (Genotype)	3								Number of columns (Genotype)	3
																																				Number of rows (Diet)	2								Number of rows (Diet)	2
																																				Number of values	144								Number of values	138
																																				Table Analyzed	r4>+ IIS agg 2way
																																				Two-way ANOVA	Ordinary
																																				Alpha	0.05
																																				Source of Variation	% of total variation	P value	P value summary	Significant?
																																				Interaction	3.367	0.0166	*	Yes
																																				Diet	42.7	<0.0001	****	Yes
																																				Sex	3.367	0.0166	*	Yes
																																				ANOVA table	SS (Type III)	DF	MS	F (DFn, DFd)	P value
																																				Interaction	2343	1	2343	F (1, 89) = 5.967	P=0.0166
																																				Diet	29704	1	29704	F (1, 89) = 75.65	P<0.0001
																																				Sex	2343	1	2343	F (1, 89) = 5.967	P=0.0166
																																				Residual	34946	89	392.7
																																				Difference between column means
																																				Predicted (LS) mean of Female	77.07
																																				Predicted (LS) mean of Male	87.13
																																				Difference between predicted means	-10.06
																																				SE of difference	4.116
																																				95% CI of difference	-18.23 to -1.876
																																				Difference between row means
																																				Predicted (LS) mean of 1Y	100
																																				Predicted (LS) mean of 2Y	64.2
																																				Difference between predicted means	35.8
																																				SE of difference	4.116
																																				95% CI of difference	27.62 to 43.98
																																				Interaction CI
																																				Mean diff, A1 - B1	9.345e-06
																																				Mean diff, A2 - B2	-20.11
																																				(A1 -B1) - (A2 - B2)	20.11
																																				95% CI of difference	3.752 to 36.47
																																				(B1 - A1) - (B2 - A2)	-20.11
																																				95% CI of difference	-36.47 to -3.752
																																				Table Analyzed	+sunRNAi IIS agg 2way
																																				Two-way ANOVA	Ordinary
																																				Alpha	0.05
																																				Source of Variation	% of total variation	P value	P value summary	Significant?
																																				Interaction	3.984	0.0119	*	Yes
																																				Sex	36.82	<0.0001	****	Yes
																																				Genotype	3.984	0.0119	*	Yes
																																				ANOVA table	SS (Type III)	DF	MS	F (DFn, DFd)	P value
																																				Interaction	3489	1	3489	F (1, 89) = 6.595	P=0.0119
																																				Sex	32253	1	32253	F (1, 89) = 60.96	P<0.0001
																																				Genotype	3489	1	3489	F (1, 89) = 6.595	P=0.0119
																																				Residual	47087	89	529.1
																																				Difference between column means
																																				Predicted (LS) mean of Female	75.21
																																				Predicted (LS) mean of Male	87.48
																																				Difference between predicted means	-12.27
																																				SE of difference	4.778
																																				95% CI of difference	-21.77 to -2.777
																																				Difference between row means
																																				Predicted (LS) mean of 1Y	100
																																				Predicted (LS) mean of 2Y	62.69
																																				Difference between predicted means	37.31
																																				SE of difference	4.778
																																				95% CI of difference	27.81 to 46.80
																																				Interaction CI
																																				Mean diff, A1 - B1	-8.333e-06
																																				Mean diff, A2 - B2	-24.54
																																				(A1 -B1) - (A2 - B2)	24.54
																																				95% CI of difference	5.554 to 43.53
																																				(B1 - A1) - (B2 - A2)	-24.54
																																				95% CI of difference	-43.53 to -5.554
																																				Table Analyzed	r4>sun-RNAi IIS agg 2way
																																				Two-way ANOVA	Ordinary
																																				Alpha	0.05
																																				Source of Variation	% of total variation	P value	P value summary	Significant?
																																				Interaction	2.649	0.1121	ns	No
																																				Diet	0.005789	0.9404	ns	No
																																				Sex	2.649	0.1121	ns	No
																																				ANOVA table	SS (Type III)	DF	MS	F (DFn, DFd)	P value
																																				Interaction	1755	1	1755	F (1, 92) = 2.574	P=0.1121
																																				Diet	3.836	1	3.836	F (1, 92) = 0.005624	P=0.9404
																																				Sex	1755	1	1755	F (1, 92) = 2.574	P=0.1121
																																				Residual	62745	92	682
																																				Difference between column means
																																				Predicted (LS) mean of Female	104.1
																																				Predicted (LS) mean of Male	95.52
																																				Difference between predicted means	8.552
																																				SE of difference	5.331
																																				95% CI of difference	-2.035 to 19.14
																																				Difference between row means
																																				Predicted (LS) mean of 1Y	100
																																				Predicted (LS) mean of 2Y	99.6
																																				Difference between predicted means	0.3998
																																				SE of difference	5.331
																																				95% CI of difference	-10.19 to 10.99
																																				Interaction CI
																																				Mean diff, A1 - B1	2.917e-06
																																				Mean diff, A2 - B2	17.1
																																				(A1 -B1) - (A2 - B2)	-17.1
																																				95% CI of difference	-38.28 to 4.071
																																				(B1 - A1) - (B2 - A2)	17.1
																																				95% CI of difference	-4.071 to 38.28
[truncated: 13 more columns]

## Sheet: Figure 4
A						B						C										D										E									F
Table Analyzed	F tra1/stj7 Agg IIS mRNA		Table Analyzed	F tra1/stj7 Agg IIS mRNA		Table Analyzed	F sunA 1Y v 2Y F norm 1Y tra mut		Table Analyzed	F sunA 1Y v 2Y F norm 1Y tra mut		Table Analyzed	F tra1-stj7 AW plast									Table Analyzed	M tra1-stj7 AW plast									Table Analyzed	M da>traF IIS Agg mRNA		Table Analyzed	M da>traF IIS Agg mRNA		Table Analyzed	M da>traF IIS Agg mRNA		Table Analyzed	M traOE sun plast		Table Analyzed	M traOE sun plast		Table Analyzed	M traOE sun plast
Column B	w 2Y		Column D	tra 2Y		Column B	F w 2Y sunA		Column D	F tra 2Y sunA		Two-way ANOVA	Ordinary									Two-way ANOVA	Ordinary									Column B	da>+ 2Y IIS		Column D	+>traF 2Y IIS		Column F	da>traF 2Y IIS		Column B	M da>+ 2Y		Column D	M +>traF 2Y		Column F	M da>traF 2Y
vs.	vs.		vs.	vs.		vs.	vs.		vs.	vs.		Alpha	0.05									Alpha	0.05									vs.	vs.		vs.	vs.		vs.	vs.		vs.	vs.		vs.	vs.		vs.	vs.
Column A	w 1Y		Column C	tra 1Y		Column A	F w 1Y sunA		Column C	F tra 1Y sunA																						Column A	da>+ 1Y IIS		Column C	+>traF 1Y IIS		Column E	da>traF 1Y IIS		Column A	M da>+ 1Y		Column C	M +>traF 1Y		Column E	M da>traF 1Y
												Source of Variation	% of total variation	P value	P value summary	Significant?						Source of Variation	% of total variation	P value	P value summary	Significant?
Unpaired t test			Unpaired t test			Unpaired t test			Unpaired t test			Interaction	15.98	< 0.0001	****	Yes						Interaction	2.285	0.4507	ns	No						Unpaired t test			Unpaired t test			Unpaired t test			Unpaired t test			Unpaired t test			Unpaired t test
P value	0.0057		P value	0.2291		P value	0.0011		P value	0.1644		Diet	21.02	< 0.0001	****	Yes						Diet	1.057	0.6069	ns	No						P value	0.0108		P value	<0.0001		P value	<0.0001		P value	0.2064		P value	0.0711		P value	0.0013
P value summary	**		P value summary	ns		P value summary	**		P value summary	ns		Genotype	40.25	< 0.0001	****	Yes						Genotype	3.513	0.3512	ns	No						P value summary	*		P value summary	****		P value summary	****		P value summary	ns		P value summary	ns		P value summary	**
Significantly different (P < 0.05)?	Yes		Significantly different (P < 0.05)?	No		Significantly different? (P < 0.05)	Yes		Significantly different? (P < 0.05)	No																						Significantly different (P < 0.05)?	Yes		Significantly different (P < 0.05)?	Yes		Significantly different (P < 0.05)?	Yes		Significantly different? (P < 0.05)	No		Significantly different? (P < 0.05)	No		Significantly different? (P < 0.05)	Yes
One- or two-tailed P value?	Two-tailed		One- or two-tailed P value?	Two-tailed		One- or two-tailed P value?	Two-tailed		One- or two-tailed P value?	Two-tailed		ANOVA table	SS	DF	MS	F (DFn, DFd)	P value					ANOVA table	SS	DF	MS	F (DFn, DFd)	P value					One- or two-tailed P value?	Two-tailed		One- or two-tailed P value?	Two-tailed		One- or two-tailed P value?	Two-tailed		One- or two-tailed P value?	Two-tailed		One- or two-tailed P value?	Two-tailed		One- or two-tailed P value?	Two-tailed
t, df	t=2.902, df=46		t, df	t=1.219, df=46		t, df	t=4.086 df=14		t, df	t=1.467 df=14		Interaction	6.844	1	6.844	F (1, 25) = 22.54	P < 0.0001					Interaction	0.1534	1	0.1534	F (1, 24) = 0.5880	P = 0.4507					t, df	t=2.658, df=46		t, df	t=5.243, df=37		t, df	t=4.574, df=46		t, df	t=1.325 df=14		t, df	t=1.997 df=11		t, df	t=3.988 df=14
												Diet	9.001	1	9.001	F (1, 25) = 29.65	P < 0.0001					Diet	0.07094	1	0.07094	F (1, 24) = 0.2719	P = 0.6069
How big is the difference?			How big is the difference?			How big is the difference?			How big is the difference?			Genotype	17.24	1	17.24	F (1, 25) = 56.79	P < 0.0001					Genotype	0.2359	1	0.2359	F (1, 24) = 0.9041	P = 0.3512					How big is the difference?			How big is the difference?			How big is the difference?			How big is the difference?			How big is the difference?			How big is the difference?
Mean of column A	100		Mean of column C	100		Mean ± SEM of column A	100.0 ± 4.231, n=8		Mean ± SEM of column C	100.0 ± 6.819, n=8		Residual	7.589	25	0.3036							Residual	6.262	24	0.2609							Mean of column A	100		Mean of column C	100		Mean of column E	100		Mean ± SEM of column A	100.0 ± 15.51, n=8		Mean ± SEM of column C	100.0 ± 10.84, n=7		Mean ± SEM of column E	100.0 ± 10.71, n=8
Mean of column B	82.48		Mean of column D	109.9		Mean ± SEM of column B	133.0 ± 6.875, n=8		Mean ± SEM of column D	112.1 ± 4.687, n=8																						Mean of column B	138.3		Mean of column D	154.3		Mean of column F	71.21		Mean ± SEM of column B	135.4 ± 21.72, n=8		Mean ± SEM of column D	139.5 ± 17.31, n=6		Mean ± SEM of column F	252.8 ± 36.79, n=8
Difference between means (B - A) ± SEM	-17.52 ± 6.036		Difference between means (D - C) ± SEM	9.910 ± 8.130		Difference between means	32.99 ± 8.073		Difference between means	12.14 ± 8.275		Number of missing values	3									Number of missing values	4									Difference between means (B - A) ± SEM	38.29 ± 14.41		Difference between means (D - C) ± SEM	54.28 ± 10.35		Difference between means (F - E) ± SEM	-28.79 ± 6.293		Difference between means	35.36 ± 26.69		Difference between means	39.53 ± 19.79		Difference between means	152.8 ± 38.32
95% confidence interval	-29.66 to -5.366		95% confidence interval	-6.454 to 26.28		95% confidence interval	15.67 to 50.30		95% confidence interval	-5.606 to 29.89																						95% confidence interval	9.290 to 67.29		95% confidence interval	33.30 to 75.25		95% confidence interval	-41.45 to -16.12		95% confidence interval	-21.88 to 92.61		95% confidence interval	-4.029 to 83.08		95% confidence interval	70.62 to 235.0
R squared (eta squared)	0.1547		R squared (eta squared)	0.03129		R squared	0.5439		R squared	0.1333		Compare cell means regardless of rows and columns										Compare cell means regardless of rows and columns										R squared (eta squared)	0.1331		R squared (eta squared)	0.4262		R squared (eta squared)	0.3127		R squared	0.1114		R squared	0.2662		R squared	0.5318
F test to compare variances			F test to compare variances			F test to compare variances			F test to compare variances			Number of families	1									Number of families	1									F test to compare variances			F test to compare variances			F test to compare variances			F test to compare variances			F test to compare variances			F test to compare variances
F, DFn, Dfd	3.289, 23, 23		F, DFn, Dfd	1.124, 23, 23		F,DFn, Dfd	2.641, 7, 7		F,DFn, Dfd	2.117, 7, 7		Number of comparisons per family	6									Number of comparisons per family	6									F, DFn, Dfd	8.853, 23, 23		F, DFn, Dfd	8.075, 17, 20		F, DFn, Dfd	2.232, 23, 23		F,DFn, Dfd	1.962, 7, 7		F,DFn, Dfd	2.186, 5, 6		F,DFn, Dfd	11.79, 7, 7
P value	0.006		P value	0.782		P value	0.2234		P value	0.3437		Alpha	0.05									Alpha	0.05									P value	<0.0001		P value	<0.0001		P value	0.0601		P value	0.3937		P value	0.3687		P value	0.0043
P value summary	**		P value summary	ns		P value summary	ns		P value summary	ns																						P value summary	****		P value summary	****		P value summary	ns		P value summary	ns		P value summary	ns		P value summary	**
Significantly different (P < 0.05)?	Yes		Significantly different (P < 0.05)?	No		Significantly different? (P < 0.05)	No		Significantly different? (P < 0.05)	No		Tukey's multiple comparisons test	Mean Diff.	95% CI of diff.	Significant?	Summary	Adjusted P Value					Tukey's multiple comparisons test	Mean Diff.	95% CI of diff.	Significant?	Summary	Adjusted P Value					Significantly different (P < 0.05)?	Yes		Significantly different (P < 0.05)?	Yes		Significantly different (P < 0.05)?	No		Significantly different? (P < 0.05)	No		Significantly different? (P < 0.05)	No		Significantly different? (P < 0.05)	Yes
Table Analyzed	tra IIS agg 2way											1Y:w1118 vs. 1Y:tra1/stj7	0.5714	-0.2387 to 1.382	No	ns	0.2374					1Y:w1118 vs. 1Y:tra1/stj7	-0.3333	-1.117 to 0.4506	No	ns	0.6492					Table Analyzed	M datra IIS 2way
												1Y:w1118 vs. 2Y:w1118	-2.089	-2.874 to -1.305	Yes	****	< 0.0001					1Y:w1118 vs. 2Y:w1118	-0.25	-0.9793 to 0.4793	No	ns	0.7808
Two-way ANOVA	Ordinary											1Y:w1118 vs. 2Y:tra1/stj7	0.4286	-0.3815 to 1.239	No	ns	0.4784					1Y:w1118 vs. 2Y:tra1/stj7	-0.2857	-1.039 to 0.4675	No	ns	0.7243					Two-way ANOVA	Ordinary
Alpha	0.05											1Y:tra1/stj7 vs. 2Y:w1118	-2.661	-3.445 to -1.876	Yes	****	< 0.0001					1Y:tra1/stj7 vs. 2Y:w1118	0.08333	-0.6777 to 0.8443	No	ns	0.9902					Alpha	0.05
												1Y:tra1/stj7 vs. 2Y:tra1/stj7	-0.1429	-0.9529 to 0.6672	No	ns	0.9617					1Y:tra1/stj7 vs. 2Y:tra1/stj7	0.04762	-0.7363 to 0.8316	No	ns	0.9983
Source of Variation	% of total variation	P value	P value summary	Significant?								2Y:w1118 vs. 2Y:tra1/stj7	2.518	1.733 to 3.302	Yes	****	< 0.0001					2Y:w1118 vs. 2Y:tra1/stj7	-0.03571	-0.7650 to 0.6936	No	ns	0.9991					Source of Variation	% of total variation	P value	P value summary	Significant?
Interaction	6.841	0.0081	**	Yes																												Interaction	16.14	<0.0001	****	Yes
Diet	0.526	0.4545	ns	No																												Diet	5.538	0.0011	**	Yes
Genotype	6.841	0.0081	**	Yes								Test details	Mean 1	Mean 2	Mean Diff.	SE of diff.	N1	N2	q	DF		Test details	Mean 1	Mean 2	Mean Diff.	SE of diff.	N1	N2	q	DF		Genotype	16.14	<0.0001	****	Yes

ANOVA table	SS (Type III)	DF	MS	F (DFn, DFd)	P value							1Y:w1118 vs. 1Y:tra1/stj7	10.29	9.714	0.5714	0.2945	7	7	2.744	25		1Y:w1118 vs. 1Y:tra1/stj7	8	8.333	-0.3333	0.2842	7	6	1.659	24		ANOVA table	SS (Type III)	DF	MS	F (DFn, DFd)	P value
Interaction	4513	1	4513	F (1, 92) = 7.336	P=0.0081							1Y:w1118 vs. 2Y:w1118	10.29	12.38	-2.089	0.2852	7	8	10.36	25		1Y:w1118 vs. 2Y:w1118	8	8.25	-0.25	0.2644	7	8	1.337	24		Interaction	43930	2	21965	F (2, 129) = 16.20	P<0.0001
Diet	347	1	347	F (1, 92) = 0.5641	P=0.4545							1Y:w1118 vs. 2Y:tra1/stj7	10.29	9.857	0.4286	0.2945	7	7	2.058	25		1Y:w1118 vs. 2Y:tra1/stj7	8	8.286	-0.2857	0.273	7	7	1.48	24		Diet	15076	1	15076	F (1, 129) = 11.12	P=0.0011
Genotype	4513	1	4513	F (1, 92) = 7.336	P=0.0081							1Y:tra1/stj7 vs. 2Y:w1118	9.714	12.38	-2.661	0.2852	7	8	13.2	25		1Y:tra1/stj7 vs. 2Y:w1118	8.333	8.25	0.08333	0.2759	6	8	0.4272	24		Genotype	43930	2	21965	F (2, 129) = 16.20	P<0.0001
Residual	56595	92	615.2									1Y:tra1/stj7 vs. 2Y:tra1/stj7	9.714	9.857	-0.1429	0.2945	7	7	0.686	25		1Y:tra1/stj7 vs. 2Y:tra1/stj7	8.333	8.286	0.04762	0.2842	6	7	0.237	24		Residual	174885	129	1356
												2Y:w1118 vs. 2Y:tra1/stj7	12.38	9.857	2.518	0.2852	8	7	12.49	25		2Y:w1118 vs. 2Y:tra1/stj7	8.25	8.286	-0.03571	0.2644	8	7	0.1911	24
Difference between column means																																Difference between row means
Predicted (LS) mean of w	91.24											Sex:diet AW tra1/st-j7 mutant control genotype										Sex:diet AW tra1/st-j7 mutant										Predicted (LS) mean of 1Y	100
Predicted (LS) mean of tra	105											Table Analyzed	tra1/stj7 mut control FvM									Table Analyzed	tra1-stj7 FvM									Predicted (LS) mean of 2Y	121.3
Difference between predicted means	-13.71																															Difference between predicted means	-21.26
SE of difference	5.063											Two-way ANOVA	Ordinary									Two-way ANOVA	Ordinary									SE of difference	6.376
95% CI of difference	-23.77 to -3.658											Alpha	0.05									Alpha	0.05									95% CI of difference	-33.87 to -8.646

Difference between row means												Source of Variation	% of total variation	P value	P value summary	Significant?						Source of Variation	% of total variation	P value	P value summary	Significant?						Table Analyzed	da>+ IIS 2way
Predicted (LS) mean of 1Y	100											Interaction	6.109	< 0.0001	****	Yes						Interaction	0.2789	0.6598	ns	No
Predicted (LS) mean of 2Y	96.2											Diet	9.882	< 0.0001	****	Yes						Diet	0.06973	0.8255	ns	No						Two-way ANOVA	Ordinary
Difference between predicted means	3.803											Sex	74.22	< 0.0001	****	Yes						Sex	67.01	< 0.0001	****	Yes						Alpha	0.05
SE of difference	5.063
95% CI of difference	-6.253 to 13.86											ANOVA table	SS	DF	MS	F (DFn, DFd)	P value					ANOVA table	SS	DF	MS	F (DFn, DFd)	P value					Source of Variation	% of total variation	P value	P value summary	Significant?
												Interaction	6.315	1	6.315	F (1, 26) = 24.13	P < 0.0001					Interaction	0.06095	1	0.06095	F (1, 23) = 0.1989	P = 0.6598					Interaction	11.4	0.0004	***	Yes
Interaction CI												Diet	10.21	1	10.21	F (1, 26) = 39.04	P < 0.0001					Diet	0.01524	1	0.01524	F (1, 23) = 0.04973	P = 0.8255					Diet	0.2363	0.5963	ns	No
Mean diff, A1 - B1	-3.333e-06											Sex	76.71	1	76.71	F (1, 26) = 293.2	P < 0.0001					Sex	14.64	1	14.64	F (1, 23) = 47.79	P < 0.0001					Sex	11.4	0.0004	***	Yes
Mean diff, A2 - B2	-27.43											Residual	6.804	26	0.2617							Residual	7.048	23	0.3064
(A1 -B1) - (A2 - B2)	27.43																															ANOVA table	SS (Type III)	DF	MS	F (DFn, DFd)	P value
95% CI of difference	7.316 to 47.54																															Interaction	26890	1	26890	F (1, 92) = 13.63	P=0.0004
(B1 - A1) - (B2 - A2)	-27.43																															Diet	557.3	1	557.3	F (1, 92) = 0.2825	P=0.5963
95% CI of difference	-47.54 to -7.316											Compare cell means regardless of rows and columns										Compare cell means regardless of rows and columns										Sex	26890	1	26890	F (1, 92) = 13.63	P=0.0004
																																Residual	181472	92	1973
Data summary												Number of families	1									Number of families	1
Number of columns (Genotype)	2											Number of comparisons per family	6									Number of comparisons per family	6									Difference between column means
Number of rows (Diet)	2											Alpha	0.05									Alpha	0.05									Predicted (LS) mean of Female	85.67
Number of values	96																															Predicted (LS) mean of Male	119.1
												Tukey's multiple comparisons test	Mean Diff.	95% CI of diff.	Significant?	Summary	Adjusted P Value					Tukey's multiple comparisons test	Mean Diff.	95% CI of diff.	Significant?	Summary	Adjusted P Value					Difference between predicted means	-33.47
																																SE of difference	9.066
												1Y:F w1118 vs. 1Y:M w1118	2.286	1.536 to 3.036	Yes	****	< 0.0001					1Y:Female tra1/Df(3L)st-j7 vs. 1Y:Male tra1/Df(3L)st-j7	1.381	0.5287 to 2.233	Yes	***	0.0009					95% CI of difference	-51.48 to -15.47
												1Y:F w1118 vs. 2Y:F w1118	-2.089	-2.816 to -1.363	Yes	****	< 0.0001					1Y:Female tra1/Df(3L)st-j7 vs. 2Y:Female tra1/Df(3L)st-j7	-0.1429	-0.9617 to 0.6759	No	ns	0.9621
												1Y:F w1118 vs. 2Y:M w1118	2.036	1.309 to 2.762	Yes	****	< 0.0001					1Y:Female tra1/Df(3L)st-j7 vs. 2Y:Male tra1/Df(3L)st-j7	1.429	0.6098 to 2.247	Yes	***	0.0004					Difference between row means
												1Y:M w1118 vs. 2Y:F w1118	-4.375	-5.101 to -3.649	Yes	****	< 0.0001					1Y:Male tra1/Df(3L)st-j7 vs. 2Y:Female tra1/Df(3L)st-j7	-1.524	-2.376 to -0.6716	Yes	***	0.0003					Predicted (LS) mean of 1Y	100
												1Y:M w1118 vs. 2Y:M w1118	-0.25	-0.9763 to 0.4763	No	ns	0.7815					1Y:Male tra1/Df(3L)st-j7 vs. 2Y:Male tra1/Df(3L)st-j7	0.04762	-0.8046 to 0.8999	No	ns	0.9986					Predicted (LS) mean of 2Y	104.8
												2Y:F w1118 vs. 2Y:M w1118	4.125	3.423 to 4.827	Yes	****	< 0.0001					2Y:Female tra1/Df(3L)st-j7 vs. 2Y:Male tra1/Df(3L)st-j7	1.571	0.7526 to 2.390	Yes	***	0.0001					Difference between predicted means	-4.819
																																SE of difference	9.066
																																95% CI of difference	-22.82 to 13.19
												Test details	Mean 1	Mean 2	Mean Diff.	SE of diff.	N1	N2	q	DF		Test details	Mean 1	Mean 2	Mean Diff.	SE of diff.	N1	N2	q	DF
																																Interaction CI
												1Y:F w1118 vs. 1Y:M w1118	10.29	8	2.286	0.2734	7	7	11.82	26		1Y:Female tra1/Df(3L)st-j7 vs. 1Y:Male tra1/Df(3L)st-j7	9.714	8.333	1.381	0.308	7	6	6.341	23		Mean diff, A1 - B1	6.667e-06
												1Y:F w1118 vs. 2Y:F w1118	10.29	12.38	-2.089	0.2647	7	8	11.16	26		1Y:Female tra1/Df(3L)st-j7 vs. 2Y:Female tra1/Df(3L)st-j7	9.714	9.857	-0.1429	0.2959	7	7	0.6828	23		Mean diff, A2 - B2	-66.95
												1Y:F w1118 vs. 2Y:M w1118	10.29	8.25	2.036	0.2647	7	8	10.87	26		1Y:Female tra1/Df(3L)st-j7 vs. 2Y:Male tra1/Df(3L)st-j7	9.714	8.286	1.429	0.2959	7	7	6.828	23		(A1 -B1) - (A2 - B2)	66.95
												1Y:M w1118 vs. 2Y:F w1118	8	12.38	-4.375	0.2647	7	8	23.37	26		1Y:Male tra1/Df(3L)st-j7 vs. 2Y:Female tra1/Df(3L)st-j7	8.333	9.857	-1.524	0.308	6	7	6.997	23		95% CI of difference	30.93 to 103.0
												1Y:M w1118 vs. 2Y:M w1118	8	8.25	-0.25	0.2647	7	8	1.335	26		1Y:Male tra1/Df(3L)st-j7 vs. 2Y:Male tra1/Df(3L)st-j7	8.333	8.286	0.04762	0.308	6	7	0.2187	23		(B1 - A1) - (B2 - A2)	-66.95
												2Y:F w1118 vs. 2Y:M w1118	12.38	8.25	4.125	0.2558	8	8	22.81	26		2Y:Female tra1/Df(3L)st-j7 vs. 2Y:Male tra1/Df(3L)st-j7	9.857	8.286	1.571	0.2959	7	7	7.511	23		95% CI of difference	-103.0 to -30.93
																																Data summary
																																Number of columns (Sex)	2
																																Number of rows (Diet)	2
																																Number of values	96
																																Table Analyzed	+>traF IIS 2way
																																Two-way ANOVA	Ordinary
																																Alpha	0.05
																																Source of Variation	% of total variation	P value	P value summary	Significant?
																																Interaction	28.61	<0.0001	****	Yes
																																Diet	3.372	0.0135	*	Yes
																																Sex	28.61	<0.0001	****	Yes
																																ANOVA table	SS (Type III)	DF	MS	F (DFn, DFd)	P value
																																Interaction	35015	1	35015	F (1, 83) = 54.04	P<0.0001
																																Diet	4126	1	4126	F (1, 83) = 6.368	P=0.0135
																																Sex	35015	1	35015	F (1, 83) = 54.04	P<0.0001
																																Residual	53780	83	647.9
																																Difference between column means
																																Predicted (LS) mean of Female	86.73
																																Predicted (LS) mean of Male	127.1
																																Difference between predicted means	-40.41
																																SE of difference	5.497
																																95% CI of difference	-51.34 to -29.47
																																Difference between row means
																																Predicted (LS) mean of 1Y	100
																																Predicted (LS) mean of 2Y	113.9
																																Difference between predicted means	-13.87
																																SE of difference	5.497
																																95% CI of difference	-24.80 to -2.938
																																Interaction CI
																																Mean diff, A1 - B1	2.917e-06
																																Mean diff, A2 - B2	-80.81
																																(A1 -B1) - (A2 - B2)	80.81
																																95% CI of difference	58.95 to 102.7
																																(B1 - A1) - (B2 - A2)	-80.81
																																95% CI of difference	-102.7 to -58.95
																																Data summary
																																Number of columns (Sex)	2
																																Number of rows (Diet)	2
																																Number of values	87
																																Table Analyzed	da>traF IIS 2way
																																Two-way ANOVA	Ordinary
																																Alpha	0.05
																																Source of Variation	% of total variation	P value	P value summary	Significant?
																																Interaction	0.6531	0.3095	ns	No
																																Diet	41.15	<0.0001	****	Yes
																																Sex	0.6531	0.3095	ns	No
																																ANOVA table	SS (Type III)	DF	MS	F (DFn, DFd)	P value
																																Interaction	413.2	1	413.2	F (1, 92) = 1.044	P=0.3095
																																Diet	26034	1	26034	F (1, 92) = 65.80	P<0.0001
																																Sex	413.2	1	413.2	F (1, 92) = 1.044	P=0.3095
																																Residual	36401	92	395.7
																																Difference between column means
																																Predicted (LS) mean of Female	81.46
																																Predicted (LS) mean of Male	85.61
																																Difference between predicted means	-4.149
																																SE of difference	4.06
																																95% CI of difference	-12.21 to 3.915
																																Difference between row means
																																Predicted (LS) mean of 1Y	100
																																Predicted (LS) mean of 2Y	67.06
																																Difference between predicted means	32.94
																																SE of difference	4.06
																																95% CI of difference	24.87 to 41.00
																																Interaction CI
																																Mean diff, A1 - B1	-2.5e-06
																																Mean diff, A2 - B2	-8.298
																																(A1 -B1) - (A2 - B2)	8.298
																																95% CI of difference	-7.830 to 24.43
																																(B1 - A1) - (B2 - A2)	-8.298
																																95% CI of difference	-24.43 to 7.830
																																Data summary
																																Number of columns (Sex)	2
																																Number of rows (Diet)	2
																																Number of values	96
[truncated: 15 more columns]

## Sheet: Figure 5
A							B										C										D			E			F										G
Table Analyzed	F sunRA srl het mRNA		Table Analyzed	F sunRA srl het mRNA			Table Analyzed	F srl het plast AW									Table Analyzed	M srl het plast AW									Table Analyzed	M da>traFsrl het sun mRNA		Table Analyzed	M da>traFsrl het IIS target mRNA		Table Analyzed	M da>tra srl het AW plast									Table Analyzed	F da>tra srl het AW plast
Column B	F w 2Y sun		Column D	F srl/+ 2Y sun			Two-way ANOVA	Ordinary									Two-way ANOVA	Ordinary									Column B	M da-trasrl 2Y		Column B	M da-trasrl 2Y IIS		Two-way ANOVA	Ordinary									Two-way ANOVA	Ordinary
vs.	vs.		vs.	vs.			Alpha	0.05									Alpha	0.05									vs.	vs.		vs.	vs.		Alpha	0.05									Alpha	0.05
Column A	F w 1Y sun		Column C	F srl/+ 1Y sun																							Column A	M da-trasrl 1Y		Column A	M da-trasrl 1Y IIS
							Source of Variation	% of total variation	P value	P value summary	Significant?						Source of Variation	% of total variation	P value	P value summary	Significant?												Source of Variation	% of total variation	P value	P value summary	Significant?						Source of Variation	% of total variation	P value	P value summary	Significant?
Unpaired t test			Unpaired t test				Interaction	44.8	<0.0001	****	Yes						Interaction	0.2032	0.8323	ns	No						Unpaired t test			Unpaired t test			Interaction	9.896	0.0146	*	Yes						Interaction	16.4	0.0008	***	Yes
P value	<0.0001		P value	0.0301			Diet	44.8	<0.0001	****	Yes						Diet	0.2032	0.8323	ns	No						P value	0.1405		P value	0.0266		Diet	41.06	< 0.0001	****	Yes						Diet	45.12	< 0.0001	****	Yes
P value summary	****		P value summary	*			Genotype	2.8	0.1132	ns	No						Genotype	34.34	0.0134	*	Yes						P value summary	ns		P value summary	*		Genotype	13.61	0.0051	**	Yes						Genotype	18.89	0.0004	***	Yes
Significantly different (P < 0.05)?	Yes		Significantly different (P < 0.05)?	Yes																							Significantly different (P < 0.05)?	No		Significantly different (P < 0.05)?	Yes
One- or two-tailed P value?	Two-tailed		One- or two-tailed P value?	Two-tailed			ANOVA table	SS (Type III)	DF	MS	F (DFn, DFd)	P value					ANOVA table	SS (Type III)	DF	MS	F (DFn, DFd)	P value					One- or two-tailed P value?	Two-tailed		One- or two-tailed P value?	Two-tailed		ANOVA table	SS	DF	MS	F (DFn, DFd)	P value					ANOVA table	SS	DF	MS	F (DFn, DFd)	P value
t, df	t=14.05, df=14		t, df	t=2.458, df=12			Interaction	14.93	1	14.93	F (1, 20) = 43.92	P<0.0001					Interaction	0.01176	1	0.01176	F (1, 15) = 0.04644	P=0.8323					t, df	t=1.562, df=14		t, df	t=2.290, df=46		Interaction	1.547	1	1.547	F (1, 23) = 6.982	P = 0.0146					Interaction	6.158	1	6.158	F (1, 22) = 15.21	P = 0.0008
							Diet	14.93	1	14.93	F (1, 20) = 43.92	P<0.0001					Diet	0.01176	1	0.01176	F (1, 15) = 0.04644	P=0.8323											Diet	6.418	1	6.418	F (1, 23) = 28.97	P < 0.0001					Diet	16.94	1	16.94	F (1, 22) = 41.85	P < 0.0001
How big is the difference?			How big is the difference?				Genotype	0.9333	1	0.9333	F (1, 20) = 2.745	P=0.1132					Genotype	1.988	1	1.988	F (1, 15) = 7.848	P=0.0134					How big is the difference?			How big is the difference?			Genotype	2.128	1	2.128	F (1, 23) = 9.604	P = 0.0051					Genotype	7.092	1	7.092	F (1, 22) = 17.52	P = 0.0004
Mean of column A	100		Mean of column C	100			Residual	6.8	20	0.34							Residual	3.8	15	0.2533							Mean of column A	100		Mean of column A	100		Residual	5.095	23	0.2215							Residual	8.905	22	0.4048
Mean of column B	225.6		Mean of column D	120.5																							Mean of column B	142.3		Mean of column B	137
Difference between means (B - A) ± SEM	125.6 ± 8.941		Difference between means (D - C) ± SEM	20.55 ± 8.357			Difference between column means										Difference between column means										Difference between means (B - A) ± SEM	42.34 ± 27.10		Difference between means (B - A) ± SEM	37.05 ± 16.18		Compare cell means regardless of rows and columns										Compare cell means regardless of rows and columns
95% confidence interval	106.4 to 144.8		95% confidence interval	2.337 to 38.75			Predicted (LS) mean of w1118	11.4									Predicted (LS) mean of w1118	7.55									95% confidence interval	-15.78 to 100.5		95% confidence interval	4.485 to 69.61
R squared (eta squared)	0.9338		R squared (eta squared)	0.335			Predicted (LS) mean of srl1/+	11									Predicted (LS) mean of srl1/+	8.2									R squared (eta squared)	0.1485		R squared (eta squared)	0.1023		Number of families	1									Number of families	1
							Difference between predicted means	0.4									Difference between predicted means	-0.65															Number of comparisons per family	6									Number of comparisons per family	6
F test to compare variances			F test to compare variances				SE of difference	0.2414									SE of difference	0.232									F test to compare variances			F test to compare variances			Alpha	0.05									Alpha	0.05
F, DFn, Dfd	6.994, 7, 7		F, DFn, Dfd	1.191, 6, 6			95% CI of difference	-0.1036 to 0.9036									95% CI of difference	-1.145 to -0.1555									F, DFn, Dfd	1.441, 7, 7		F, DFn, Dfd	3.402, 23, 23
P value	0.02		P value	0.837																							P value	0.6421		P value	0.0048		Tukey's multiple comparisons test	Mean Diff.	95% CI of diff.	Significant?	Summary	Adjusted P Value					Tukey's multiple comparisons test	Mean Diff.	95% CI of diff.	Significant?	Summary	Adjusted P Value
P value summary	*		P value summary	ns			Difference between row means										Difference between row means										P value summary	ns		P value summary	**
Significantly different (P < 0.05)?	Yes		Significantly different (P < 0.05)?	No			Predicted (LS) mean of 1Y	10.4									Predicted (LS) mean of 1Y	7.85									Significantly different (P < 0.05)?	No		Significantly different (P < 0.05)?	Yes		1Y:da>tra vs. 1Y:da>tra srl +/-	0.08333	-0.6201 to 0.7868	No	ns	0.9875					1Y:da>tra vs. 1Y:da>tra srl +/-	0.07143	-0.9114 to 1.054	No	ns	0.997
							Predicted (LS) mean of 2Y	12									Predicted (LS) mean of 2Y	7.9															1Y:da>tra vs. 2Y:da>tra	-1.464	-2.138 to -0.7902	Yes	****	< 0.0001					1Y:da>tra vs. 2Y:da>tra	-2.595	-3.578 to -1.612	Yes	****	< 0.0001
Table Analyzed	sun srl het 2way						Difference between predicted means	-1.6									Difference between predicted means	-0.05															1Y:da>tra vs. 2Y:da>tra srl +/-	-0.4167	-1.120 to 0.2868	No	ns	0.3775					1Y:da>tra vs. 2Y:da>tra srl +/-	-0.5714	-1.516 to 0.3729	No	ns	0.3573
							SE of difference	0.2414									SE of difference	0.232															1Y:da>tra srl +/- vs. 2Y:da>tra	-1.548	-2.272 to -0.8230	Yes	****	< 0.0001					1Y:da>tra srl +/- vs. 2Y:da>tra	-2.667	-3.687 to -1.647	Yes	****	< 0.0001
Two-way ANOVA	Ordinary						95% CI of difference	-2.104 to -1.096									95% CI of difference	-0.5445 to 0.4445															1Y:da>tra srl +/- vs. 2Y:da>tra srl +/-	-0.5	-1.252 to 0.2520	No	ns	0.2811					1Y:da>tra srl +/- vs. 2Y:da>tra srl +/-	-0.6429	-1.626 to 0.3400	No	ns	0.2927
Alpha	0.05																																2Y:da>tra vs. 2Y:da>tra srl +/-	1.048	0.3230 to 1.772	Yes	**	0.0029					2Y:da>tra vs. 2Y:da>tra srl +/-	2.024	1.041 to 3.007	Yes	****	< 0.0001
							Interaction CI										Interaction CI
Source of Variation	% of total variation	P value	P value summary	Significant?			Mean diff, A1 - B1	-1.2									Mean diff, A1 - B1	-0.7
Interaction	22.25	<0.0001	****	Yes			Mean diff, A2 - B2	2									Mean diff, A2 - B2	-0.6															Test details	Mean 1	Mean 2	Mean Diff.	SE of diff.	N1	N2	q	DF		Test details	Mean 1	Mean 2	Mean Diff.	SE of diff.	N1	N2
Diet	43.06	<0.0001	****	Yes			(A1 -B1) - (A2 - B2)	-3.2									(A1 -B1) - (A2 - B2)	-0.1
Genotype	22.25	<0.0001	****	Yes			95% CI of difference	-4.207 to -2.193									95% CI of difference	-1.089 to 0.8891															1Y:da>tra vs. 1Y:da>tra srl +/-	9.25	9.167	0.08333	0.2542	8	6	0.4636	23		1Y:da>tra vs. 1Y:da>tra srl +/-	11.57	11.5	0.07143	0.354	7	6
							(B1 - A1) - (B2 - A2)	3.2									(B1 - A1) - (B2 - A2)	0.1															1Y:da>tra vs. 2Y:da>tra	9.25	10.71	-1.464	0.2436	8	7	8.501	23		1Y:da>tra vs. 2Y:da>tra	11.57	14.17	-2.595	0.354	7	6
ANOVA table	SS (Type III)	DF	MS	F (DFn, DFd)	P value		95% CI of difference	2.193 to 4.207									95% CI of difference	-0.8891 to 1.089															1Y:da>tra vs. 2Y:da>tra srl +/-	9.25	9.667	-0.4167	0.2542	8	6	2.318	23		1Y:da>tra vs. 2Y:da>tra srl +/-	11.57	12.14	-0.5714	0.3401	7	7
Interaction	20609	1	20609	F (1, 26) = 72.31	P<0.0001																												1Y:da>tra srl +/- vs. 2Y:da>tra	9.167	10.71	-1.548	0.2619	6	7	8.358	23		1Y:da>tra srl +/- vs. 2Y:da>tra	11.5	14.17	-2.667	0.3673	6	6
Diet	39880	1	39880	F (1, 26) = 139.9	P<0.0001		Data summary										Data summary																1Y:da>tra srl +/- vs. 2Y:da>tra srl +/-	9.167	9.667	-0.5	0.2717	6	6	2.602	23		1Y:da>tra srl +/- vs. 2Y:da>tra srl +/-	11.5	12.14	-0.6429	0.354	6	7
Genotype	20609	1	20609	F (1, 26) = 72.31	P<0.0001		Number of columns (Genotype)	2									Number of columns (Genotype)	2															2Y:da>tra vs. 2Y:da>tra srl +/-	10.71	9.667	1.048	0.2619	7	6	5.658	23		2Y:da>tra vs. 2Y:da>tra srl +/-	14.17	12.14	2.024	0.354	6	7
Residual	7410	26	285				Number of rows (Diet)	2									Number of rows (Diet)	2
							Number of values	24									Number of values	19
Difference between column means
Predicted (LS) mean of w1118	162.8						Compare cell means regardless of rows and columns										Compare cell means regardless of rows and columns
Predicted (LS) mean of srl1/+	110.3
Difference between predicted means	52.54						Number of families	1									Number of families	1
SE of difference	6.178						Number of comparisons per family	6									Number of comparisons per family	6
95% CI of difference	39.84 to 65.24						Alpha	0.05									Alpha	0.05
Difference between row means							Tukey's multiple comparisons test	Predicted (LS) mean diff.	95.00% CI of diff.	Significant?	Summary	Adjusted P Value					Tukey's multiple comparisons test	Predicted (LS) mean diff.	95.00% CI of diff.	Significant?	Summary	Adjusted P Value
Predicted (LS) mean of 1Y	100
Predicted (LS) mean of 2Y	173.1						1Y:w1118 vs. 1Y:srl1/+	-1.2	-2.156 to -0.2444	Yes	*	0.0108					1Y:w1118 vs. 1Y:srl1/+	-0.7	-1.673 to 0.2731	No	ns	0.2063
Difference between predicted means	-73.08						1Y:w1118 vs. 2Y:w1118	-3.2	-4.232 to -2.168	Yes	****	<0.0001					1Y:w1118 vs. 2Y:w1118	-0.1	-1.073 to 0.8731	No	ns	0.9906
SE of difference	6.178						1Y:w1118 vs. 2Y:srl1/+	-1.2	-2.156 to -0.2444	Yes	*	0.0108					1Y:w1118 vs. 2Y:srl1/+	-0.7	-1.673 to 0.2731	No	ns	0.2063
95% CI of difference	-85.78 to -60.38						1Y:srl1/+ vs. 2Y:w1118	-2	-2.956 to -1.044	Yes	****	<0.0001					1Y:srl1/+ vs. 2Y:w1118	0.6	-0.3175 to 1.517	No	ns	0.2753
							1Y:srl1/+ vs. 2Y:srl1/+	0	-0.8724 to 0.8724	No	ns	>0.9999					1Y:srl1/+ vs. 2Y:srl1/+	0	-0.9175 to 0.9175	No	ns	>0.9999
Interaction CI							2Y:w1118 vs. 2Y:srl1/+	2	1.044 to 2.956	Yes	****	<0.0001					2Y:w1118 vs. 2Y:srl1/+	-0.6	-1.517 to 0.3175	No	ns	0.2753
Mean diff, A1 - B1	-1.482e-08
Mean diff, A2 - B2	105.1
(A1 -B1) - (A2 - B2)	-105.1						Test details	Predicted (LS) mean 1	Predicted (LS) mean 2	Predicted (LS) mean diff.	SE of diff.	N1	N2	q	DF		Test details	Predicted (LS) mean 1	Predicted (LS) mean 2	Predicted (LS) mean diff.	SE of diff.	N1	N2	q	DF
95% CI of difference	-130.5 to -79.68
(B1 - A1) - (B2 - A2)	105.1						1Y:w1118 vs. 1Y:srl1/+	9.8	11	-1.2	0.3414	5	7	4.971	20		1Y:w1118 vs. 1Y:srl1/+	7.5	8.2	-0.7	0.3376	4	5	2.932	15
95% CI of difference	79.68 to 130.5						1Y:w1118 vs. 2Y:w1118	9.8	13	-3.2	0.3688	5	5	12.27	20		1Y:w1118 vs. 2Y:w1118	7.5	7.6	-0.1	0.3376	4	5	0.4189	15
							1Y:w1118 vs. 2Y:srl1/+	9.8	11	-1.2	0.3414	5	7	4.971	20		1Y:w1118 vs. 2Y:srl1/+	7.5	8.2	-0.7	0.3376	4	5	2.932	15
Data summary							1Y:srl1/+ vs. 2Y:w1118	11	13	-2	0.3414	7	5	8.284	20		1Y:srl1/+ vs. 2Y:w1118	8.2	7.6	0.6	0.3183	5	5	2.666	15
Number of columns (Genotype)	2						1Y:srl1/+ vs. 2Y:srl1/+	11	11	0	0.3117	7	7	0	20		1Y:srl1/+ vs. 2Y:srl1/+	8.2	8.2	0	0.3183	5	5	0	15
Number of rows (Diet)	2						2Y:w1118 vs. 2Y:srl1/+	13	11	2	0.3414	5	7	8.284	20		2Y:w1118 vs. 2Y:srl1/+	7.6	8.2	-0.6	0.3183	5	5	2.666	15
Number of values	30
[truncated: 2 more columns]

## Sheet: Figure 6
A						B									C										D									E
Table Analyzed	F fecundity w v InR		Table Analyzed	F fecundity w v InR		Table Analyzed	F fecundity w v ilp2 1Y v 2Y		Table Analyzed	F fecundity w v ilp2 1Y v 2Y		Table Analyzed	F fecundity w v ilp2 1Y v 2Y		Table Analyzed	F fecundity sun RNAi		Table Analyzed	F fecundity sun RNAi		Table Analyzed	F fecundity sun RNAi			Table Analyzed	M fertility w v pten		Table Analyzed	M fertility w v pten		Table Analyzed	M fertility w v pten		Table Analyzed	M fertility r4>sunoe		Table Analyzed	M fertility r4>sunoe		Table Analyzed	M fertility r4>sunoe
Column B	F w 2Y		Column F	F InR/+ 2Y		Column B	F w 2Y		Column D	F ilp2 2Y		Column D	F ilp2 2Y		Column B	r4>+ 2Y		Column D	+>sun-RNAi 2Y		Column F	r4>sun-RNAi 2Y			Column B	w 2Y		Column D	pten100/+ 2Y		Column C	pten100/+ 1Y		Column B	r4>+ 2Y		Column D	+>sun 2Y		Column F	r4>sun 2Y
vs.	vs.		vs.	vs.		vs.	vs.		vs.	vs.		vs.	vs.		vs.	vs.		vs.	vs.		vs.	vs.			vs.	vs.		vs.	vs.		vs.	vs.		vs.	vs.		vs.	vs.		vs.	vs.
Column A	F w 1Y		Column E	F InR/+ 1Y		Column A	F w 1Y		Column C	F ilp2 1Y		Column B	F w 2Y		Column A	r4>+ 1Y		Column C	+>sun-RNAi 1Y		Column E	r4>sun-RNAi 1Y			Column A	w 1Y		Column C	pten100/+ 1Y		Column A	w 1Y		Column A	r4>+ 1Y		Column C	+>sun 1Y		Column E	r4>sun 1Y
Unpaired t test			Unpaired t test			Unpaired t test			Unpaired t test			Unpaired t test			Unpaired t test			Unpaired t test			Unpaired t test				Unpaired t test			Unpaired t test			Unpaired t test			Unpaired t test			Unpaired t test			Unpaired t test
P value	0.0009		P value	0.617		P value	< 0.0001		P value	0.4105		P value	0.0044		P value	< 0.0001		P value	< 0.0001		P value	0.0243			P value	0.3662		P value	0.0137		P value	0.4003		P value	0.9222		P value	0.0595		P value	0.32
P value summary	***		P value summary	ns		P value summary	****		P value summary	ns		P value summary	**		P value summary	****		P value summary	****		P value summary	*			P value summary	ns		P value summary	*		P value summary	ns		P value summary	ns		P value summary	ns		P value summary	ns
Significantly different? (P < 0.05)	Yes		Significantly different? (P < 0.05)	No		Significantly different? (P < 0.05)	Yes		Significantly different? (P < 0.05)	No		Significantly different? (P < 0.05)	Yes		Significantly different? (P < 0.05)	Yes		Significantly different? (P < 0.05)	Yes		Significantly different? (P < 0.05)	Yes			Significantly different? (P < 0.05)	No		Significantly different? (P < 0.05)	Yes		Significantly different? (P < 0.05)	No		Significantly different? (P < 0.05)	No		Significantly different? (P < 0.05)	No		Significantly different? (P < 0.05)	No
One- or two-tailed P value?	Two-tailed		One- or two-tailed P value?	Two-tailed		One- or two-tailed P value?	Two-tailed		One- or two-tailed P value?	Two-tailed		One- or two-tailed P value?	Two-tailed		One- or two-tailed P value?	Two-tailed		One- or two-tailed P value?	Two-tailed		One- or two-tailed P value?	Two-tailed			One- or two-tailed P value?	Two-tailed		One- or two-tailed P value?	Two-tailed		One- or two-tailed P value?	Two-tailed		One- or two-tailed P value?	Two-tailed		One- or two-tailed P value?	Two-tailed		One- or two-tailed P value?	Two-tailed
t, df	t=3.607 df=37		t, df	t=0.5043 df=37		t, df	t=4.903 df=57		t, df	t=0.8294 df=55		t, df	t=2.969 df=57		t, df	t=8.729 df=38		t, df	t=7.092 df=38		t, df	t=2.346 df=38			t, df	t=0.9247 df=20		t, df	t=2.703 df=20		t, df	t=0.8594 df=20		t, df	t=0.09900 df=18		t, df	t=2.029 df=16		t, df	t=1.023 df=18
How big is the difference?			How big is the difference?			How big is the difference?			How big is the difference?			How big is the difference?			How big is the difference?			How big is the difference?			How big is the difference?				How big is the difference?			How big is the difference?			How big is the difference?			How big is the difference?			How big is the difference?			How big is the difference?
Mean ± SEM of column A	10.95 ± 0.8701, n=19		Mean ± SEM of column E	14.20 ± 1.065, n=20		Mean ± SEM of column A	10.97 ± 0.8429, n=29		Mean ± SEM of column C	11.18 ± 1.377, n=28		Mean ± SEM of column B	18.20 ± 1.200, n=30		Mean ± SEM of column A	9.700 ± 0.6370, n=20		Mean ± SEM of column C	10.05 ± 0.8840, n=20		Mean ± SEM of column E	13.95 ± 0.8475, n=20			Mean ± SEM of column A	38.55 ± 2.337, n=11		Mean ± SEM of column C	35.73 ± 2.301, n=11		Mean ± SEM of column A	38.55 ± 2.337, n=11		Mean ± SEM of column A	30.20 ± 1.908, n=10		Mean ± SEM of column C	29.00 ± 3.307, n=10		Mean ± SEM of column E	29.30 ± 3.041, n=10
Mean ± SEM of column B	16.40 ± 1.219, n=20		Mean ± SEM of column F	15.00 ± 1.180, n=19		Mean ± SEM of column B	18.20 ± 1.200, n=30		Mean ± SEM of column D	12.79 ± 1.375, n=29		Mean ± SEM of column D	12.79 ± 1.375, n=29		Mean ± SEM of column B	18.60 ± 0.7960, n=20		Mean ± SEM of column D	17.00 ± 0.4230, n=20		Mean ± SEM of column F	11.15 ± 0.8407, n=20			Mean ± SEM of column B	41.27 ± 1.799, n=11		Mean ± SEM of column D	44.82 ± 2.453, n=11		Mean ± SEM of column C	35.73 ± 2.301, n=11		Mean ± SEM of column B	29.90 ± 2.354, n=10		Mean ± SEM of column D	19.13 ± 3.538, n=8		Mean ± SEM of column F	33.00 ± 1.961, n=10
Difference between means	5.453 ± 1.512		Difference between means	0.8000 ± 1.586		Difference between means	7.234 ± 1.475		Difference between means	1.615 ± 1.947		Difference between means	-5.407 ± 1.821		Difference between means	8.900 ± 1.020		Difference between means	6.950 ± 0.9800		Difference between means	-2.800 ± 1.194			Difference between means	2.727 ± 2.949		Difference between means	9.091 ± 3.363		Difference between means	-2.818 ± 3.279		Difference between means	-0.3000 ± 3.030		Difference between means	-9.875 ± 4.868		Difference between means	3.700 ± 3.618
95% confidence interval	2.390 to 8.515		95% confidence interval	-2.414 to 4.014		95% confidence interval	4.280 to 10.19		95% confidence interval	-2.287 to 5.516		95% confidence interval	-9.054 to -1.760		95% confidence interval	6.836 to 10.96		95% confidence interval	4.966 to 8.934		95% confidence interval	-5.217 to -0.3834			95% confidence interval	-3.425 to 8.880		95% confidence interval	2.077 to 16.11		95% confidence interval	-9.659 to 4.022		95% confidence interval	-6.667 to 6.067		95% confidence interval	-20.19 to 0.4439		95% confidence interval	-3.901 to 11.30
R squared	0.2602		R squared	0.006827		R squared	0.2967		R squared	0.01235		R squared	0.1339		R squared	0.6673		R squared	0.5696		R squared	0.1265			R squared	0.041		R squared	0.2676		R squared	0.03561		R squared	0.0005442		R squared	0.2046		R squared	0.05491
F test to compare variances			F test to compare variances			F test to compare variances			F test to compare variances			F test to compare variances			F test to compare variances			F test to compare variances			F test to compare variances				F test to compare variances			F test to compare variances			F test to compare variances			F test to compare variances			F test to compare variances			F test to compare variances
F,DFn, Dfd	2.066, 19, 18		F,DFn, Dfd	1.165, 18, 19		F,DFn, Dfd	2.096, 29, 28		F,DFn, Dfd	1.032, 28, 27		F,DFn, Dfd	1.269, 28, 29		F,DFn, Dfd	1.562, 19, 19		F,DFn, Dfd	4.367, 19, 19		F,DFn, Dfd	1.016, 19, 19			F,DFn, Dfd	1.687, 10, 10		F,DFn, Dfd	1.136, 10, 10		F,DFn, Dfd	1.032, 10, 10		F,DFn, Dfd	1.523, 9, 9		F,DFn, Dfd	1.092, 9, 7		F,DFn, Dfd	2.405, 9, 9
P value	0.13		P value	0.7425		P value	0.0535		P value	0.9367		P value	0.5275		P value	0.3397		P value	0.0023		P value	0.9721			P value	0.4227		P value	0.8436		P value	0.9614		P value	0.5409		P value	0.9289		P value	0.2073
P value summary	ns		P value summary	ns		P value summary	ns		P value summary	ns		P value summary	ns		P value summary	ns		P value summary	**		P value summary	ns			P value summary	ns		P value summary	ns		P value summary	ns		P value summary	ns		P value summary	ns		P value summary	ns
Significantly different? (P < 0.05)	No		Significantly different? (P < 0.05)	No		Significantly different? (P < 0.05)	No		Significantly different? (P < 0.05)	No		Significantly different? (P < 0.05)	No		Significantly different? (P < 0.05)	No		Significantly different? (P < 0.05)	Yes		Significantly different? (P < 0.05)	No			Significantly different? (P < 0.05)	No		Significantly different? (P < 0.05)	No		Significantly different? (P < 0.05)	No		Significantly different? (P < 0.05)	No		Significantly different? (P < 0.05)	No		Significantly different? (P < 0.05)	No
															Table Analyzed	F fecundity sun RNAi																		Table Analyzed	M fertility r4>suni sunoe
															ANOVA summary																			ANOVA summary
															F	30.37																		F	0.04912
															P value	< 0.0001																		P value	0.9522
															P value summary	****																		P value summary	ns
															Are differences among means statistically significant? (P < 0.05)	Yes																		Are differences among means statistically significant? (P < 0.05)	No
															R square	0.5159																		R square	0.003625
															Brown-Forsythe test																			Brown-Forsythe test
															F (DFn, DFd)	1.573 (2, 57)																		F (DFn, DFd)	1.098 (2, 27)
															P value	0.2164																		P value	0.348
															P value summary	ns																		P value summary	ns
															Significantly different standard deviations? (P < 0.05)	No																		Significantly different standard deviations? (P < 0.05)	No
															Bartlett's test																			Bartlett's test
															Bartlett's statistic (corrected)	8.967																		Bartlett's statistic (corrected)	2.639
															P value	0.0113																		P value	0.2673
															P value summary	*																		P value summary	ns
															Significantly different standard deviations? (P < 0.05)	Yes																		Significantly different standard deviations? (P < 0.05)	No
															ANOVA table	SS	DF	MS	F (DFn, DFd)	P value														ANOVA table	SS	DF	MS	F (DFn, DFd)	P value
															Treatment (between columns)	615.2	2	307.6	F (2, 57) = 30.37	P < 0.0001														Treatment (between columns)	7.8	2	3.9	F (2, 27) = 0.04912	P = 0.9522
															Residual (within columns)	577.4	57	10.13																Residual (within columns)	2144	27	79.4
															Total	1193	59																	Total	2152	29
															Data summary																			Data summary
															Number of treatments (columns)	3																		Number of treatments (columns)	3
															Number of values (total)	60																		Number of values (total)	30
															Number of families	1																		Number of families	1
															Number of comparisons per family	3																		Number of comparisons per family	3
															Alpha	0.05																		Alpha	0.05
															Tukey's multiple comparisons test	Mean Diff.	95% CI of diff.	Significant?	Summary	Adjusted P Value														Tukey's multiple comparisons test	Mean Diff.	95% CI of diff.	Significant?	Summary	Adjusted P Value
															r4>+ 2Y vs. +>sun-RNAi 2Y	1.6	-0.8219 to 4.022	No	ns	0.2583	B-D													r4>+ 1Y vs. +>sun 1Y	1.2	-8.680 to 11.08	No	ns	0.9513	A-C
															r4>+ 2Y vs. r4>sun-RNAi 2Y	7.45	5.028 to 9.872	Yes	****	< 0.0001	B-F													r4>+ 1Y vs. r4>sun 1Y	0.9	-8.980 to 10.78	No	ns	0.9723	A-E
															+>sun-RNAi 2Y vs. r4>sun-RNAi 2Y	5.85	3.428 to 8.272	Yes	****	< 0.0001	D-F													+>sun 1Y vs. r4>sun 1Y	-0.3	-10.18 to 9.580	No	ns	0.9969	C-E
															Test details	Mean 1	Mean 2	Mean Diff.	SE of diff.	n1	n2	q	DF											Test details	Mean 1	Mean 2	Mean Diff.	SE of diff.	n1	n2	q	DF
															r4>+ 2Y vs. +>sun-RNAi 2Y	18.6	17	1.6	1.006	20	20	2.248	57											r4>+ 1Y vs. +>sun 1Y	30.2	29	1.2	3.985	10	10	0.4259	27
															r4>+ 2Y vs. r4>sun-RNAi 2Y	18.6	11.15	7.45	1.006	20	20	10.47	57											r4>+ 1Y vs. r4>sun 1Y	30.2	29.3	0.9	3.985	10	10	0.3194	27
															+>sun-RNAi 2Y vs. r4>sun-RNAi 2Y	17	11.15	5.85	1.006	20	20	8.22	57											+>sun 1Y vs. r4>sun 1Y	29	29.3	-0.3	3.985	10	10	0.1065	27

## Sheet: Figure 1 - figure supplement 1
A/B										C/D
Table Analyzed	1x v 0.5x whole PV									Table Analyzed	FvM plast 1 v 2
Two-way ANOVA	Ordinary									Two-way ANOVA	Ordinary
Alpha	0.05									Alpha	0.05
Source of Variation	% of total variation	P value	P value summary	Significant?						Source of Variation	% of total variation	P value	P value summary	Significant?
Interaction	0.03792	0.7048	ns	No						Interaction	1.008	0.0001	***	Yes
Diet	9.655	< 0.0001	****	Yes						Diet	16.72	< 0.0001	****	Yes
Sex	33.04	< 0.0001	****	Yes						Sex	60.45	< 0.0001	****	Yes
ANOVA table	SS	DF	MS	F (DFn, DFd)	P value					ANOVA table	SS	DF	MS	F (DFn, DFd)	P value
Interaction	0.004542	1	0.004542	F (1, 210) = 0.1439	P = 0.7048					Interaction	0.2095	1	0.2095	F (1, 280) = 14.90	P = 0.0001
Diet	1.156	1	1.156	F (1, 210) = 36.64	P < 0.0001					Diet	3.476	1	3.476	F (1, 280) = 247.1	P < 0.0001
Sex	3.957	1	3.957	F (1, 210) = 125.4	P < 0.0001					Sex	12.57	1	12.57	F (1, 280) = 893.3	P < 0.0001
Residual	6.629	210	0.03157							Residual	3.939	280	0.01407
Number of missing values	34									Number of missing values	36
Compare cell means regardless of rows and columns										Compare cell means regardless of rows and columns
Number of families	1									Number of families	1
Number of comparisons per family	6									Number of comparisons per family	6
Alpha	0.05									Alpha	0.05
Tukey's multiple comparisons test	Mean Diff.	95% CI of diff.	Significant?	Summary	Adjusted P Value					Tukey's multiple comparisons test	Mean Diff.	95% CI of diff.	Significant?	Summary	Adjusted P Value
0.5x:Female w1118 vs. 0.5x:Male w1118	0.2843	0.1882 to 0.3805	Yes	****	< 0.0001					1Y:Female vs. 1Y:Male	0.3679	0.3161 to 0.4198	Yes	****	< 0.0001
0.5x:Female w1118 vs. 1x:Female w1118	-0.1394	-0.2307 to -0.04805	Yes	***	0.0006					1Y:Female vs. 2Y:Female	-0.2768	-0.3304 to -0.2231	Yes	****	< 0.0001
0.5x:Female w1118 vs. 1x:Male w1118	0.1263	0.03441 to 0.2183	Yes	**	0.0026					1Y:Female vs. 2Y:Male	0.2003	0.1473 to 0.2532	Yes	****	< 0.0001
0.5x:Male w1118 vs. 1x:Female w1118	-0.4237	-0.5116 to -0.3357	Yes	****	< 0.0001					1Y:Male vs. 2Y:Female	-0.6447	-0.6951 to -0.5943	Yes	****	< 0.0001
0.5x:Male w1118 vs. 1x:Male w1118	-0.158	-0.2466 to -0.06940	Yes	****	< 0.0001					1Y:Male vs. 2Y:Male	-0.1676	-0.2173 to -0.1180	Yes	****	< 0.0001
1x:Female w1118 vs. 1x:Male w1118	0.2657	0.1824 to 0.3490	Yes	****	< 0.0001					2Y:Female vs. 2Y:Male	0.4771	0.4256 to 0.5285	Yes	****	< 0.0001
Test details	Mean 1	Mean 2	Mean Diff.	SE of diff.	N1	N2	q	DF		Test details	Mean 1	Mean 2	Mean Diff.	SE of diff.	N1	N2	q	DF
0.5x:Female w1118 vs. 0.5x:Male w1118	1.275	0.991	0.2843	0.03712	43	49	10.83	210		1Y:Female vs. 1Y:Male	1.752	1.384	0.3679	0.02007	62	80	25.93	280
0.5x:Female w1118 vs. 1x:Female w1118	1.275	1.415	-0.1394	0.03526	43	62	5.59	210		1Y:Female vs. 2Y:Female	1.752	2.028	-0.2768	0.02075	62	69	18.86	280
0.5x:Female w1118 vs. 1x:Male w1118	1.275	1.149	0.1263	0.0355	43	60	5.033	210		1Y:Female vs. 2Y:Male	1.752	1.551	0.2003	0.02048	62	73	13.83	280
0.5x:Male w1118 vs. 1x:Female w1118	0.991	1.415	-0.4237	0.03396	49	62	17.64	210		1Y:Male vs. 2Y:Female	1.384	2.028	-0.6447	0.01949	80	69	46.79	280
0.5x:Male w1118 vs. 1x:Male w1118	0.991	1.149	-0.158	0.03421	49	60	6.531	210		1Y:Male vs. 2Y:Male	1.384	1.551	-0.1676	0.0192	80	73	12.35	280
1x:Female w1118 vs. 1x:Male w1118	1.415	1.149	0.2657	0.03217	62	60	11.68	210		2Y:Female vs. 2Y:Male	2.028	1.551	0.4771	0.01991	69	73	33.88	280
Table Analyzed	1x v 2x whole PV
Two-way ANOVA	Ordinary
Alpha	0.05
Source of Variation	% of total variation	P value	P value summary	Significant?
Interaction	3.406	< 0.0001	****	Yes
Diet	15.28	< 0.0001	****	Yes
Sex	45.55	< 0.0001	****	Yes
ANOVA table	SS	DF	MS	F (DFn, DFd)	P value
Interaction	0.7575	1	0.7575	F (1, 318) = 40.71	P < 0.0001
Diet	3.398	1	3.398	F (1, 318) = 182.6	P < 0.0001
Sex	10.13	1	10.13	F (1, 318) = 544.5	P < 0.0001
Residual	5.917	318	0.01861
Number of missing values	78
Compare cell means regardless of rows and columns
Number of families	1
Number of comparisons per family	6
Alpha	0.05
Tukey's multiple comparisons test	Mean Diff.	95% CI of diff.	Significant?	Summary	Adjusted P Value
1x:Female w1118 vs. 1x:Male w1118	0.2657	0.2019 to 0.3295	Yes	****	< 0.0001
1x:Female w1118 vs. 2x:Female w1118	-0.3118	-0.3687 to -0.2548	Yes	****	< 0.0001
1x:Female w1118 vs. 2x:Male w1118	0.1539	0.09697 to 0.2109	Yes	****	< 0.0001
1x:Male w1118 vs. 2x:Female w1118	-0.5775	-0.6350 to -0.5199	Yes	****	< 0.0001
1x:Male w1118 vs. 2x:Male w1118	-0.1118	-0.1693 to -0.05425	Yes	****	< 0.0001
2x:Female w1118 vs. 2x:Male w1118	0.4657	0.4159 to 0.5155	Yes	****	< 0.0001
Test details	Mean 1	Mean 2	Mean Diff.	SE of diff.	N1	N2	q	DF
1x:Female w1118 vs. 1x:Male w1118	1.415	1.149	0.2657	0.0247	62	60	15.21	318
1x:Female w1118 vs. 2x:Female w1118	1.415	1.726	-0.3118	0.02205	62	100	20	318
1x:Female w1118 vs. 2x:Male w1118	1.415	1.261	0.1539	0.02205	62	100	9.872	318
1x:Male w1118 vs. 2x:Female w1118	1.149	1.726	-0.5775	0.02228	60	100	36.66	318
1x:Male w1118 vs. 2x:Male w1118	1.149	1.261	-0.1118	0.02228	60	100	7.097	318
2x:Female w1118 vs. 2x:Male w1118	1.726	1.261	0.4657	0.01929	100	100	34.14	318

## Sheet: Figure 1 - figure supplement 2
A/B
Table Analyzed	Cs raw PV
Two-way ANOVA	Ordinary
Alpha	0.05
Source of Variation	% of total variation	P value	P value summary	Significant?
Interaction	1.888	< 0.0001	****	Yes
Diet	18.36	< 0.0001	****	Yes
Sex	62.73	< 0.0001	****	Yes
ANOVA table	SS	DF	MS	F (DFn, DFd)	P value
Interaction	0.3519	1	0.3519	F (1, 323) = 24.50	P < 0.0001
Diet	3.42	1	3.42	F (1, 323) = 238.1	P < 0.0001
Sex	11.69	1	11.69	F (1, 323) = 813.7	P < 0.0001
Residual	4.64	323	0.01436
Number of missing values	53
Compare cell means regardless of rows and columns
Number of families	1
Number of comparisons per family	6
Alpha	0.05
Tukey's multiple comparisons test	Mean Diff.	95% CI of diff.	Significant?	Summary	Adjusted P Value
1Y:Female vs. 1Y:Male	0.3191	0.2740 to 0.3643	Yes	****	< 0.0001
1Y:Female vs. 2Y:Female	-0.2759	-0.3279 to -0.2238	Yes	****	< 0.0001
1Y:Female vs. 2Y:Male	0.1772	0.1304 to 0.2241	Yes	****	< 0.0001
1Y:Male vs. 2Y:Female	-0.595	-0.6468 to -0.5431	Yes	****	< 0.0001
1Y:Male vs. 2Y:Male	-0.1419	-0.1885 to -0.09521	Yes	****	< 0.0001
2Y:Female vs. 2Y:Male	0.4531	0.3997 to 0.5065	Yes	****	< 0.0001
Test details	Mean 1	Mean 2	Mean Diff.	SE of diff.	N1	N2	q	DF
1Y:Female vs. 1Y:Male	1.794	1.475	0.3191	0.01748	93	95	25.81	323
1Y:Female vs. 2Y:Female	1.794	2.07	-0.2759	0.02016	93	57	19.35	323
1Y:Female vs. 2Y:Male	1.794	1.617	0.1772	0.01816	93	82	13.81	323
1Y:Male vs. 2Y:Female	1.475	2.07	-0.595	0.02008	95	57	41.9	323
1Y:Male vs. 2Y:Male	1.475	1.617	-0.1419	0.01807	95	82	11.11	323
2Y:Female vs. 2Y:Male	2.07	1.617	0.4531	0.02067	57	82	31	323

## Sheet: Figure 1 - figure supplement 3
A
Table Analyzed	Wing length plast
Two-way ANOVA	Ordinary
Alpha	0.05
Source of Variation	% of total variation	P value	P value summary	Significant?
Interaction	1.6	0.0004	***	Yes
Diet	8.769	< 0.0001	****	Yes
Sex	76.31	< 0.0001	****	Yes
ANOVA table	SS	DF	MS	F (DFn, DFd)	P value
Interaction	0.01132	1	0.01132	F (1, 82) = 13.49	P = 0.0004
Diet	0.06202	1	0.06202	F (1, 82) = 73.91	P < 0.0001
Sex	0.5397	1	0.5397	F (1, 82) = 643.2	P < 0.0001
Residual	0.06881	82	0.0008391
Number of missing values	26
Compare cell means regardless of rows and columns
Number of families	1
Number of comparisons per family	6
Alpha	0.05
Tukey's multiple comparisons test	Mean Diff.	95% CI of diff.	Significant?	Summary	Adjusted P Value
1Y:Female vs. 1Y:Male	0.1382	0.1130 to 0.1634	Yes	****	< 0.0001
1Y:Female vs. 2Y:Female	-0.07816	-0.1034 to -0.05295	Yes	****	< 0.0001
1Y:Female vs. 2Y:Male	0.1068	0.08299 to 0.1306	Yes	****	< 0.0001
1Y:Male vs. 2Y:Female	-0.2163	-0.2398 to -0.1929	Yes	****	< 0.0001
1Y:Male vs. 2Y:Male	-0.03137	-0.05330 to -0.009443	Yes	**	0.0018
2Y:Female vs. 2Y:Male	0.185	0.1630 to 0.2069	Yes	****	< 0.0001
Test details	Mean 1	Mean 2	Mean Diff.	SE of diff.	N1	N2	q	DF
1Y:Female vs. 1Y:Male	1.403	1.265	0.1382	0.009612	16	21	20.33	82
1Y:Female vs. 2Y:Female	1.403	1.481	-0.07816	0.009612	16	21	11.5	82
1Y:Female vs. 2Y:Male	1.403	1.296	0.1068	0.009078	16	28	16.64	82
1Y:Male vs. 2Y:Female	1.265	1.481	-0.2163	0.008939	21	21	34.22	82
1Y:Male vs. 2Y:Male	1.265	1.296	-0.03137	0.008362	21	28	5.306	82
2Y:Female vs. 2Y:Male	1.481	1.296	0.185	0.008362	21	28	31.28	82

## Sheet: Figure 1 - figure supplement 4
A										B
Table Analyzed	PV sugar plast									Table Analyzed	PV calories plast
Two-way ANOVA	Ordinary									Two-way ANOVA	Ordinary
Alpha	0.05									Alpha	0.05
Source of Variation	% of total variation	P value	P value summary	Significant?						Source of Variation	% of total variation	P value	P value summary	Significant?
Interaction	0.007233	0.6536	ns	No						Interaction	0.06755	0.3698	ns	No
Diet	1.515	< 0.0001	****	Yes						Diet	1.481	< 0.0001	****	Yes
Sex	81.74	< 0.0001	****	Yes						Sex	71.32	< 0.0001	****	Yes
ANOVA table	SS	DF	MS	F (DFn, DFd)	P value					ANOVA table	SS	DF	MS	F (DFn, DFd)	P value
Interaction	0.001724	1	0.001724	F (1, 486) = 0.2017	P = 0.6536					Interaction	0.01002	1	0.01002	F (1, 251) = 0.8073	P = 0.3698
Diet	0.3611	1	0.3611	F (1, 486) = 42.24	P < 0.0001					Diet	0.2196	1	0.2196	F (1, 251) = 17.70	P < 0.0001
Sex	19.48	1	19.48	F (1, 486) = 2279	P < 0.0001					Sex	10.58	1	10.58	F (1, 251) = 852.4	P < 0.0001
Residual	4.154	486	0.008548							Residual	3.115	251	0.01241
Number of missing values	42									Number of missing values	41
Compare cell means regardless of rows and columns										Compare cell means regardless of rows and columns
Number of families	1									Number of families	1
Number of comparisons per family	6									Number of comparisons per family	6
Alpha	0.05									Alpha	0.05
Tukey's multiple comparisons test	Mean Diff.	95% CI of diff.	Significant?	Summary	Adjusted P Value					Tukey's multiple comparisons test	Mean Diff.	95% CI of diff.	Significant?	Summary	Adjusted P Value
1S:Female vs. 1S:Male	0.403	0.3722 to 0.4338	Yes	****	< 0.0001					1Y cal:Female vs. 1Y cal:Male	0.4288	0.3803 to 0.4774	Yes	****	< 0.0001
1S:Female vs. 2S:Female	0.05811	0.02804 to 0.08819	Yes	****	< 0.0001					1Y cal:Female vs. 2Y cal:Female	0.07275	0.01790 to 0.1276	Yes	**	0.0039
1S:Female vs. 2S:Male	0.4536	0.4226 to 0.4846	Yes	****	< 0.0001					1Y cal:Female vs. 2Y cal:Male	0.476	0.4279 to 0.5240	Yes	****	< 0.0001
1S:Male vs. 2S:Female	-0.3449	-0.3748 to -0.3150	Yes	****	< 0.0001					1Y cal:Male vs. 2Y cal:Female	-0.3561	-0.4120 to -0.3002	Yes	****	< 0.0001
1S:Male vs. 2S:Male	0.0506	0.01970 to 0.08150	Yes	***	0.0002					1Y cal:Male vs. 2Y cal:Male	0.04714	-0.002100 to 0.09638	No	ns	0.0662
2S:Female vs. 2S:Male	0.3955	0.3653 to 0.4257	Yes	****	< 0.0001					2Y cal:Female vs. 2Y cal:Male	0.4032	0.3478 to 0.4587	Yes	****	< 0.0001
Test details	Mean 1	Mean 2	Mean Diff.	SE of diff.	N1	N2	q	DF		Test details	Mean 1	Mean 2	Mean Diff.	SE of diff.	N1	N2	q	DF
1S:Female vs. 1S:Male	1.743	1.34	0.403	0.01194	119	121	47.75	486		1Y cal:Female vs. 1Y cal:Male	1.858	1.429	0.4288	0.01879	74	67	32.28	251
1S:Female vs. 2S:Female	1.743	1.685	0.05811	0.01167	119	133	7.045	486		1Y cal:Female vs. 2Y cal:Female	1.858	1.785	0.07275	0.02121	74	44	4.851	251
1S:Female vs. 2S:Male	1.743	1.29	0.4536	0.01204	119	117	53.3	486		1Y cal:Female vs. 2Y cal:Male	1.858	1.382	0.476	0.01857	74	70	36.24	251
1S:Male vs. 2S:Female	1.34	1.685	-0.3449	0.01161	121	133	41.99	486		1Y cal:Male vs. 2Y cal:Female	1.429	1.785	-0.3561	0.02162	67	44	23.3	251
1S:Male vs. 2S:Male	1.34	1.29	0.0506	0.01199	121	117	5.97	486		1Y cal:Male vs. 2Y cal:Male	1.429	1.382	0.04714	0.01904	67	70	3.502	251
2S:Female vs. 2S:Male	1.685	1.29	0.3955	0.01172	133	117	47.73	486		2Y cal:Female vs. 2Y cal:Male	1.785	1.382	0.4032	0.02143	44	70	26.61	251

[truncated: 19 more sheets: Figure 1 - figure supplement 5, Figure 1 - figure supplement 6, Figure 1 - figure supplement 7, Figure 2 - figure supplement 1, Figure 2 - figure supplement 2, Figure 2 - figure supplement 3, Figure 2 - figure supplement 4, Figure 3 - figure supplement 2, Figure 3 - figure supplement 3, Figure 3 - figure supplement 4, Figure 3 - figure supplement 5, Figure 3 - figure supplement 6, Figure 3 - figure supplement 7, Figure 3 - figure supplement 8, Figure 4 - figure supplement 1, Figure 4 - figure supplement 2, Figure 4 - figure supplement 3, Figure 5 - figure supplement 1, Figure 5 - figure supplement 2]
