# Supplementary material for: Female-biased upregulation of insulin pathway activity mediates the sex difference in Drosophila body size plasticity
Source: eLife journal article supplement (doi:10.7554/elife.58341), 2021-01-15
Supplement: supp [file elife-58341-supp-v1.zip › elife_poa_e58341_Supplementary_file_2.xlsx]

## Sheet: Figure 1
A/B							C/D					E			F			G			H			I					J
Raw adult weight							Raw adult weight					Female - Relative mRNA levels			Female - GFP ratio			Male - Relative mRNA levels			Male - GFP ratio			Female - Raw pupal volume					Male - Raw pupal volume
F w1118 0.5x	F w1118 1x	F w1118 2x	M w1118 0.5x	M w1118 1x	M w1118 2x		F w1118 1Y	F w1118 2Y	M w1118 1Y	M w1118 2Y		F IIS 1Y	F IIS 2Y		F 1Y	F 2Y		M IIS 1Y	M IIS 2Y		M 1Y	M 2Y		w1118		InRE19/+			w1118		InRE19/+
8	10	12	6	7	7		11	13	8	7		108.146	45.8802		1.58652	2.06566		110.525	121.725		1.521	1.84888		1Y	2Y	1Y	2Y		1Y	2Y	1Y	2Y
9	11	12	6	8	9		11	12	9	9		98.253	52.5396		1.31438	1.79825		92.8033	105.665		1.45535	2.32083		1.7629	1.84405	1.74288	1.84872		1.38413	1.45242	1.23661	1.31259
8	11	13	6	7	7		11	13	9	7		89.941	67.6974		1.45059	2.47202		96.8851	88.3278		1.40599	2.07132		1.82331	1.96741	1.46528	1.81099		1.3393	1.57765	0.983248	1.37022
9	11	14	6	8	9		10	14	9	9		98.733	38.1001		1.54438	1.55054		99.7862	80.5431		1.22073	1.69408		1.88971	1.81681	1.65408	1.78015		1.43955	1.43967	1.42493	1.36075
9	10	13	5	7	8		11	13	8	8		88.4374	62.0219		1.67559	1.76202		143.521	70.273		1.08718	1.99839		1.60522	1.85153	1.41392	1.63036		1.37661	1.56168	1.19218	1.24663
9	11	13	7	8	9		12	13	8	9		138.744	57.3889		1.60809	2.09087		73.6113	73.0493		1.26767	1.47388		1.74398	1.88598	1.36973	1.67515		1.30455	1.34654	1.35385	1.30065
	11	14	6	9	8		12	14	8	8		73.7378	94.0312		1.75921	2.15434		82.868	73.4824		1.13708	1.3064		1.59112	2.10304	1.54509	1.76108		1.60004	1.43972	1.29666	1.32443
		13		7	9			13	8	9		104.007	74.8155		2.03951	2.39167		95.5584	112		1.42645	1.53086		1.74495	1.88163	1.43623	1.63531		1.50167	2.01291	1.01974	1.39361
		13		7	8			13	8	8		84.7746	64.118		1.78539	2.54805		106.163	106.746		1.37039	1.53307		1.85003	1.93586	1.63405	1.71459		1.26698	1.4021	1.15948	1.32845
		14		8	7			14	9	7		80.0691	74.1146		1.46437	1.68784		98.279	127.414		2.03914	1.28879		1.54839	1.9294	1.58044	1.57717		1.37406	1.63861	1.23798	1.33214
		13			8			13		8		134.672	72.7631		1.0672	1.55256		99.7352	102.055		2.12053	1.24609		1.6444	1.93074	1.52682	1.49864		1.33458	1.52937	1.26383	1.35899
												103.316	100.953		1.12208	1.68667		94.2514	72.418		1.61484	1.41535		1.75553	1.86983	1.73565	1.56934		1.29302	1.47331	1.17866	1.22163
												99.2901	52.9693		1.68939	2.06492		106.013	67.0545		1.72289	1.88117		1.7708	1.99134	1.54313	1.73275		1.47625	1.49359	1.21566	1.47606
												117.803	53.7624		1.57221	1.90009		101.953	86.8079		1.6144	1.91848		1.77894	2.03599	1.73933	1.74634		1.52369	1.50406	1.2586	1.35208
												86.871	62.2699		1.84468	1.34528		67.7889	196.228		1.89687	1.98845		1.80969	1.79889	1.52474	1.69091		1.34248	1.47676	1.18384	1.44918
												93.2035	58.1098		1.68386	1.95178		93.7432	120.609			1.89152		1.67363	1.93751	1.56133	1.74729		1.2832	1.51167	1.16853	1.39072
												98.1719	59.2871		2.01819	2.01414		136.515	98.4981			1.62855		1.77	1.96538	1.7741	1.65062		1.3318	1.42495	1.21547	1.35252
												98.3668	67.9549		1.6233	2.49679		119.636	82.6274			1.84645		1.74314	2.02569	1.46753	1.62385		1.25748	1.46887	1.36481	1.39981
												97.0774	41.3003					89.1328	77.4642					1.57044	2.03209	1.5981	1.69878		1.44514	1.42564	1.25385	1.33329
												99.0053	61.4429					91.2308	70.453					1.62687	1.92444	1.55577	1.60801		1.3081	1.61342	1.10193	1.37483
												109.007	59.4084						110.708					1.19303	1.9652	1.62957	0.994748		1.25046	1.47273	1.13882	1.2106
												112.903	113.59											1.74449	2.05193	1.4806	1.59205		1.41826	1.51717	1.06313	1.32392
												59.8935	86.5894											1.66739	1.99205	1.54677	1.62298		1.3051	1.50744	1.38483	1.38429
												125.575	42.9527											1.89483	2.11473	1.47945	1.75086		1.18331	1.57386	1.22061	1.31044
																								1.98275	1.93422	1.60232	1.68747		1.30963	1.44699	1.34163	1.38701
																								1.5386	1.92077	1.47758	1.73994		1.23717	1.45603	1.26446	1.76439
																								1.53604	1.8477	1.66126	1.72179		1.38546	1.41335	1.03959	1.27684
																								1.79128	1.78082	1.38842	1.8435		1.34685	1.44353	1.1526	1.35401
																								1.67042	1.90623	1.66853	1.77353		1.27204	1.58939	1.22963	1.33714
																								1.81538	2.01185	1.63136	1.83626		1.21525	1.50326	1.1506	1.31854
																								1.78959	1.99703	1.82247	1.83021		1.44583	1.44028	1.65205	1.41208
																								1.69756	2.2838	1.58783	1.60289		1.367	1.53765	1.14922	1.37823
																								1.65717	1.96268	1.62236	1.76552		1.22677	1.38344	1.26638	1.39101
																								1.76576	2.05287	1.54644	1.80937		1.284	1.58623	1.25646	1.50279
																								1.81892	2.00322	1.55056	1.35261		1.46626	1.53673	1.23264	1.40442
																								1.59638	1.92368	1.46818	1.74498		1.3756	1.50408	1.30597	1.43275
																								1.48523	1.96906	1.48852	1.78862		1.41474	1.50197	1.25128	1.38804
																								1.60015	2.05093	1.57556	1.77374		1.28989	1.47542	1.21128	1.44318
																								1.82473	2.16976	1.55772	1.78142		1.31643	1.5381	1.22739	1.49258
																								1.47903	1.93295	1.77804	1.76636		1.35962	1.60161	1.18202	1.37214
																								1.86404	1.919	1.50786	1.90168		1.27901	1.50749	1.22926	1.32745
																								1.60893	1.96455	1.58466	1.78662		1.35128	1.51596	1.20768	1.37952
																								1.59599	1.8534	1.66685	1.76939		1.34437	1.44598	1.28393	1.39574
																								1.68682	2.08024	1.80731	1.76561		1.35536	1.54759	1.194	1.4976
																								1.56936	2.0073	1.76933	1.77934		1.40123	1.56204	1.28577	1.2495
																								1.67855	1.86211	1.56223	1.47754		1.30361	1.51215	1.31494	1.43754
																								1.94255	2.05721	1.78563	1.78229		1.29836	1.53497	1.56999	1.32721
																								1.71111	2.00531	1.56782	1.64472		1.37548	1.66287	1.17938	1.40892
																								1.80742	2.01424	1.59917	1.36979		1.42076	1.49463	1.24052
																								1.54058	1.8761	1.46921	1.83163		1.35953	1.49949	1.49377
																								1.64711	1.8467	1.72189	1.79654		1.40403	1.59469	1.3123
																								1.56203	2.02778	1.8486	1.67694		1.11845	1.4662	1.09847
																								1.75947	2.0695	1.49915	1.78572		1.39501	1.48095	1.38158
																								1.58987	1.95026	1.63845	1.82476		1.41044	1.54075	1.23925
																								1.72896	1.99718	1.59573	1.75237		1.25305	1.46733	1.16089
																								1.66992	1.92316	1.41529	1.74627		1.39015	1.51124	1.02443
																								1.56437	1.94445	1.48821	1.66056		1.4846	1.50746	1.37922
																								1.6919	1.8186	1.53996	1.73063		1.37598	1.601	1.21327
																								1.78279	1.94872	1.61335	1.79791		1.29182	1.46423	1.38021
																									1.88391	1.76117	1.77424		1.31728	1.59268	1.29195
																									1.92071	1.68052	0.994949		1.37409	1.55485	1.23447
																									1.95147	1.53879	1.60109		1.24523	1.43772	1.16458
																									2.03782	1.59214	1.65698		1.15264	1.6016	1.2475
																									2.05925	1.53225	1.81059		1.41659	1.63509	1.23106
																									1.92989	1.65248	1.83131		1.36984	1.61014	1.34045
																									1.85444	1.63947	1.83718		1.27409	1.51265	1.6332
																									2.00521	1.58712	1.70354		1.41881	1.53323	1.31462
																									1.93176	1.68614	1.85882		1.44656	1.65457	1.204
																									1.92738	1.52406			1.24396	1.49867	1.36805
																									2.10207	1.71468			1.37563	1.45459	1.60933
																									2.04915	1.87			1.42427	1.4752	1.60429
																									1.97113	1.69792			1.39654	1.4848	1.27599
																									1.92057	1.5464			1.33666	1.53429	1.49118
																									1.85261	1.61223				1.46666	1.27612
																									1.91655	1.80361				1.42702	1.3137
																									1.91141	1.68264				1.46421	1.28351
																									2.04121	1.50577				1.46975
																										1.52144

## Sheet: Figure 2
A					B					C					D					E					F					G
Female - Relative mRNA levels					Male - Relative mRNA levels					Female - Raw adult weight					Male - Raw adult weight					Female - Raw pupal volume					Male - Raw pupal volume					Female - Raw pupal volume
w 1Y	w 2Y	ilp2 1Y	ilp2 2Y		w 1Y	w 2Y	ilp2 1Y	ilp2 2Y		w1118		dilp2			w1118		dilp2			w1118		dilp2			w1118		dilp2			F da>+	F +>dilp2-RNAi	F da>dilp2-RNAi	M da>+	M +>dilp2-RNAi	M da>dilp2-RNAi
95.2301	69.7312	129.968	80.5922		113.161	95.7019	127.133	88.7956		1Y	2Y	1Y	2Y		1Y	2Y	1Y	2Y		1Y	2Y	1Y	2Y		1Y	2Y	1Y	2Y		1.90088	1.47224	1.61877	1.65537	1.35807	1.34377
102.958	45.6592	102.95	41.8395		102.55	125.505	80.003	50.2299		11	13	11	11		8	7	8	8		1.63914	1.71349	1.6194	1.52698		1.25676	1.21999	1.27907	1.34504		1.95112	2.00658	1.71632	1.562	1.52924	1.36628
95.2998	67.5736	77.907	56.0519		56.2968	82.1073	92.864	48.7314		11	12	10	10		9	9	9	8		1.71525	1.81487	1.45198	1.49206		1.23338	1.41411	1.15358	1.29375		1.88876	1.70936	1.71646	1.53949	1.48922	1.38983
106.512	36.2697	89.1759	43.8618		127.992	79.4851	112.916	61.7326		11	13	10	11		9	7	8	7		1.41784	1.76317	1.40303	1.4314		1.24709	1.44276	1.03064	1.26886		2.05661	1.96277	1.78665	1.56301	1.38517	1.45238
111.646	92.9519	192.558	116.404		115.436	76.9015	98.719	79.4126		10	14	10	11		9	9	8	8		1.44815	1.59925	1.55683	1.5008		1.26289	1.37765	1.25034	1.34159		1.94413	1.78468	1.73832	1.52418	1.47598	1.43258
94.3683	64.927	73.8664	84.8987		87.9307	63.574	88.3649	95.0359		11	13	10	11		8	8	6	8		1.54293	1.68347	1.48485	1.40939		1.18866	1.28999	1.17615	1.21532		2.05113	1.92783	1.7386	1.56715	1.48268	1.38636
101.869	73.7749	74.5624	66.581		96.6333	76.3304	75.7777	78.58		12	13	11	11		8	9	9	10		1.47243	1.75195	1.27403	1.56814		1.2767	1.44435	1.18	1.38254		2.01173	1.94337	1.71994	1.57611	1.36813	1.3868
92.1169	65.3697	59.0134	91.6893		106.644	60.3535	89.7791	89.4655		12	14	11	11		8	8	7	9		1.46398	2.04281	1.38062	1.48679		1.34573	1.34971	1.24722	1.33601		2.11946	1.89408	1.89274	1.6571	1.37375	1.42826
93.891	31.0563	125.1	39.9455		49.2743	91.3973	134.443	27.1975			13	9	12		8	9	9	7		1.66492	1.73123	1.50633	1.44416		1.07976	1.27705	1.35795	1.4177		1.92301	1.75968	2.02476	1.55937	1.40666	1.53912
175.874	24.8305	105.243	33.6429		79.8411	103.114	105.15	49.5844			13		11		8	8	8	7		1.60054	1.63293	1.47311	1.46315		1.14534	1.4883	1.1933	1.30848		2.04471	1.96117	1.79421	1.58003	1.49846	1.52685
51.8944	42.7081	67.9006	84.3549		164.241	81.2387	112.059	132.341			14		10		9	7	9	7		1.34949	1.74994	1.38674	1.30406		1.18197	1.41658	1.29614	1.27419		2.07032	1.96806	1.72118	1.54512	1.38282	1.43934
78.3403	26.4919	101.757	46.0485		89.4124	112.394	82.7904	39.4288			13		11			8		8		1.62347	1.82825	1.14147	1.41648		1.25008	1.49809	1.22813	1.40597		2.08507	1.81069	1.87635	1.54138	1.33699	1.46884
85.1797	41.5955	153.631	266.485		85.0958	62.776	91.9468	45.6502										7		1.73966	1.93061	1.42203	1.49242		1.43827	1.56455	1.26553	1.4214		1.89389	1.79531	1.62751	1.42476	1.35507	1.4064
116.667	34.4696	116.628	91.9413		125.492	58.2987	113.862	76.4344												1.61482	1.81626	1.54622	1.41505		1.19009	1.47601	1.26804	1.32149		1.97644	1.7198	1.66802	1.54272	1.55252	1.55198
88.1904	49.9898	48.995	136.883		94.8825	45.7841	94.1909	140.183												1.5791	1.90741	1.33692	1.44914		1.15844	1.42623	1.2174	1.54786		1.90131	1.76463	1.73485	1.60495	1.49894	1.53437
109.963	40.5626	80.7454	278.349		73.6494	39.5427	118.41	85.1484												1.30778	1.80905	1.37712	1.5263		1.24963	1.20984	1.26131	1.33352		2.06867	1.80883	1.81975	1.57293	1.37073	1.38827
103.639	51.8759	84.6895	31.9749		131.468	70.026	133.443	54.154												1.63636	1.72106	1.56955	1.50994		1.21728	1.408	1.17003	1.16905		1.80501	1.6857	1.70666	1.88713	1.35001	1.45995
98.0163	35.281	130.943	25.4584		110.329	78.2599	54.496	82.4184												1.61842	1.79072	1.43746	1.48918		1.31254	1.53747	1.21729	1.35005		2.06445	1.97042	1.79961	1.53475	1.48333	1.56225
90.8386	75.1986	84.3295	35.6708		97.4023	56.4102	93.6512	71.7584												1.52228	1.71633	1.63524	1.30999		1.12632	1.3503	1.21311	1.26692		1.99817	2.0082	1.79688	1.53154	1.44401	1.40164
107.506	67.1078	100.038	27.5334		87.4529	48.0588		54.912												1.63672	1.91079	1.36906	1.5779		1.18752	1.61066	1.2682	1.3916		1.93451	1.99014	1.75216	1.52855	1.41939	1.69134
82.3641	73.7757	187.753	47.9413		104.815	59.1358		47.3115												1.4268	1.92716	1.33668	1.41447		1.15367	1.41906	1.21203	1.32659		2.00314	1.82203	1.8853	1.64507	1.50218	1.39645
117.934	79.4581	84.2073	53.8345			51.1181		64.2769												1.48134	1.85109	1.58731	1.42785		1.5289	1.3964	1.3266	1.29157		1.92489	1.84122	1.88386	1.51668	1.34825	1.43306
96.3004	80.9086	55.8993	85.2944			82.9468		53.1092												1.40996	1.90253	1.33615	1.52527		1.15338	1.34075	1.11104	1.30924		1.95368	1.76229	1.6818	1.49608	1.55569	1.47105
103.401	108.054	72.1408	73.995			156.232		142.206												1.62812	1.74638	1.30457	1.49532		1.28392	1.35787	1.14282	1.44324		2.00417	1.87767	1.86525	1.59009	1.65399	1.45139
																				1.89369	1.77337	1.35363	1.52235		1.0427	1.3156	1.12155	1.4055		1.9252	1.78724	1.63188	1.53974	1.30385	1.41912
																				1.68557	1.78107	1.43229	1.46274		1.2028	1.37129	1.12025	1.29114		2.06571	2.01177	1.72987	1.49708	1.47423	1.33904
																				1.67745	1.90822	1.48179	1.53469		1.27883	1.35178	1.24717	1.34175		2.03536	2.00167	1.97641	1.56369	1.38247	1.32349
																				1.58157	1.92818	1.51131	1.57596		1.29827	1.25045	1.26408	1.40189		1.92952	2.00416	1.71289	1.53387	1.44227	1.48949
																				1.56549	1.6673	1.51373	1.5389		1.24997	1.36285	1.24597	1.2597		1.94473	2.15349	1.71138	1.41161	1.36808	1.65332
																				1.55404	1.90461	1.40127	1.43754		1.19029	1.29259	1.05443	1.24944		2.05755	1.74619	1.81877	1.52839	1.36388	1.43628
																				1.45136	1.66639	1.4783	1.42913		1.29779	1.33306	1.24071	1.30116		2.07906	2.02807	1.78037	1.48119	1.52915	1.52011
																				1.55655	1.88298	1.44408	1.58526		1.20321	1.17785	1.37969	1.36455		2.00675	1.99233	1.86096	1.46579	1.53491	1.24886
																				1.86629	1.65627	1.5465	1.40016		1.27172	1.40287	1.35257	1.32027		1.7918	1.6441	1.63429	1.56305	1.53026	1.49694
																				1.56942	1.84058	1.48235	1.46027		1.17272	1.49443	1.25237	1.15291		1.96514	2.09407	1.92749	1.63071	1.32186	1.46037
																				1.83884	1.69935	1.30856	1.39653		1.1993	1.28641	1.23908	1.31106		2.07592	1.63752	1.75027	1.54596	1.43035	1.56584
																				1.80775	1.90279	1.40213	1.52611		1.20378	1.3434	1.11854	1.27116		2.14289	1.71558	1.83217	1.52684	1.54904	1.45459
																				1.80486	1.76804	1.56659	1.37618		1.35179	1.47943	1.35714	1.3632		2.19218	1.66993	1.79851	1.61173	1.41165	1.47661
																				1.71126	1.80932	1.6377	1.55092		1.24798	1.38384	1.38188	1.37749		1.98471	1.65288	1.72562	1.40594	1.38532	1.45362
																				1.72151	1.56135	1.58138	1.47151		1.26486	1.27175	1.23267	1.39713		1.93759	1.86058	1.76842	1.67534	1.60725	1.40137
																				1.54452	1.74692	1.3738	1.46529		1.45153	1.29552	1.23238	1.40801		2.08709	1.96648	1.9797	1.61607	1.7232	1.4464
																				1.85022	1.74677	1.43516	1.6005		1.30157	1.37896	1.39115	1.38669		1.73516	1.75354	1.84422	1.59199	1.39217	1.41991
																				1.58811	1.66455	1.44547	1.52355		1.38164	1.33023	1.36803	1.27874		2.09134	1.98385	1.80139	1.55565	1.45741	1.41383
																				1.57114	1.53201	1.4503	1.43455		1.43532	1.41534	1.21034	1.35944		1.84534	1.90854	1.75545	1.60598	1.583	1.37233
																				1.35202	1.75406	1.53833	1.49277		1.21732	1.14933	1.27869	1.26427		2.01876	1.89515	1.79205	1.53717	1.38822	1.33635
																				1.69053	1.78754	1.33658	1.37939		1.0914	1.2959	1.23217	1.29839		2.09114		1.72176	1.56332	1.34302	1.394
																				1.62133	1.77343	1.42707	1.594		1.15947	1.23003	1.19513	1.24827		1.91614		1.71903	1.55359	1.51074	1.37336
																				1.58221	1.94785	1.43603	1.43655		1.22371	1.39007	1.26979	1.45775		1.78606		1.87273	1.57249	1.50344	1.33754
																				1.88354	1.84058	1.48614	1.47285		1.22985	1.40258	1.15127	1.32727		2.02729		1.90928	1.55532	1.55465	1.44694
																				1.51139	1.69157	1.43294	1.57357		1.21561	1.34944	1.28533	1.24075		1.84497		1.66143	1.58566	1.344	1.27075
																				1.5397	1.81114	1.4652	1.57881		1.31844	1.3946	1.16947	1.25283		2.12201		1.71428	1.63765	1.55157	1.42615
																				1.64433	1.80668	1.41602	1.65423		1.24322	1.45853	1.08723	1.35762					1.50602	1.60094	1.55679
																				1.55446	1.89229	1.36507	1.38641		1.28283	1.45692	1.23421	1.41434					1.49078	1.48571	1.44796
																				1.56375	1.81249	1.62789	1.51821		1.27318	1.45636	1.13016	1.36047					1.53801	1.38633	1.47597
																				1.46132	1.88619	1.43791	1.54101		1.40113	1.40724	1.05775	1.30238					1.55384	1.56546	1.52177
																				1.6027	1.89827	1.5648	1.46834		1.26947	1.25116	1.26307	1.38041					1.6031	1.43272	1.3438
																				1.60861	1.74055	1.57301	1.41998		1.22559	1.35195	1.247	1.24787					1.54375	1.44175	1.46239
																				1.46686	1.83463	1.43742	1.40725		1.23829	1.38473	1.27418	1.32553					1.3602	1.38482	1.38451
																				1.47484	1.92569	1.45125	1.51009		1.26362	1.38498	1.15921	1.2937						1.487	1.41224
																				1.33872	1.85924	1.30435	1.30934		1.16825	1.25805	1.25496	1.24717							1.47708
																				1.5405	1.60324	1.42891	1.4352		1.4428	1.17822	1.276	1.34064
																				1.61559	1.64755	1.42674	1.44592		1.22736	1.28895	1.17855	1.42073
																				1.45629	2.07075	1.47479	1.42228		1.26021	1.27487	1.31811	1.36659
																				1.53968	1.79835	1.62393	1.50956		1.28614	1.82262	1.11757	1.28578
																				1.65051	1.85176	1.46232	1.48137		1.26555	1.29528	1.1741	1.28329
																				1.63349	1.74983	1.54882	1.27645		1.26835	1.21548	1.18483	1.32868
																				1.61095	1.76073	1.34634	1.44338		1.18916	1.40833	1.36221	1.31968
																				1.53087	2.1396	1.56008	1.36044		1.22999	1.4395	1.23374	1.389
																				1.62983	1.91101	1.4112	1.60923		1.30307	1.25325	1.2212	1.31339
																				1.45658	1.70029	1.31619	1.55939		1.21054	1.14692	1.27005	1.50936
																				1.47357	1.71123	1.36372	1.4497		1.27333	1.32579	1.13559	1.3102
																				1.76403	2.01309	1.57986	1.41993		1.36667	1.26305	1.20113	1.28126
																				1.13033	1.94585	1.50122	1.4938		1.12701	1.32252	1.27501	1.41792
																				1.59939	1.42967	1.55113	1.46731		1.29868	1.36405	1.1318	1.41199
																				1.53622	1.96005	1.15119	1.45562		1.24944	1.35558	1.20652	1.23458
																				1.50698	1.82179	1.37493	1.47591		1.43715	1.48862	1.17448	1.43653
																					1.28821	1.51834	1.57253		1.15994	1.37299	1.23039	1.24754
																					1.90819	1.3626	1.47761		1.2671	1.31798	1.22983	1.28903
																					1.90138	1.35319	1.53965		1.31862	1.2752	1.19942	1.37505
																					2.0336	1.38255	1.52308		1.31545	1.25263	1.33011	1.32131
																					1.62877	1.47055	1.38905		1.11864	1.47028	1.3713	1.33209
																					1.90628	1.40328	1.52931		1.36853	1.28931	1.20831	1.35017
																					1.80787	1.39136	1.36471		1.20421	1.27207	1.22055	1.34722
																					1.84678	1.53145	1.44364		1.12974	1.22844	1.24171	1.4025
																					1.82788	1.45565	1.49524		1.28795	1.36787	1.0366	1.35879
																					1.58213		1.39275		1.17672	1.33601	1.17053	1.31278
																					1.69796		1.3883		1.30073	1.40627	1.24116	1.43413
																					1.75615		1.40603		1.26771	1.394	1.2927	1.38506
																					1.79789		1.55414		1.30309	1.32184	1.15522	1.30901
																					1.97577		1.50298		1.33066	1.53257	1.13745	1.19126
																					1.74249		1.3648		1.16209	1.34753	1.1963	1.40488
																					1.89828		1.45439		1.20041	1.48968	1.2669	1.23674
																					1.69494		1.35386		1.31957	1.38878	1.15434	1.24443
																					1.94048		1.49218		1.20515	1.28752	1.15491	1.40444
																					1.82123		1.57862		1.3156	1.41013	1.19263	1.2915
																					1.51742		1.39441		1.19372	1.35515	1.31291	1.49529
																					1.75594		1.36521		1.23607	1.40996	1.21424	1.43097
																					1.70563		1.40041		1.16346	1.33144	1.26928	1.23039
																					1.7002		1.52897		1.30236	1.37759	1.1162	1.18924
																					1.64832		1.62546		1.13031	1.33691	1.24209	1.27108
																					1.51847		1.57682		1.23703	1.39261	1.19828	1.30803
																					1.69437		1.59927		1.21353	1.49884	1.19507	1.47314
																					1.71537		1.44779		1.1437	1.58315	1.31029	1.38589
																					1.66829		1.41172		1.35408	1.41493	1.22195	1.2534
																					2.03478		1.49358		1.07625	1.60087	1.24464	1.3414
																					1.83949		1.34925		1.20304	1.3191	1.17776	1.37735
																					1.7951		1.33714		1.32098	1.47267	1.29854	1.34712
																					1.80826		1.41246		1.39469	1.44585	1.22426	1.3005
																					1.73489		1.42744		1.37177	1.38318	1.21577	1.25893
																					1.67777		1.5027		1.15602	1.52522	1.1856	1.45155
																					1.89686		1.32876		1.31373	1.36233	1.26839	1.42867
																					1.7992		1.48214		1.20247	1.39596	1.32553	1.3766
																					1.63172		1.5019			1.30277	1.05118	1.42655
																					1.96371		1.423			1.57676	1.17614	1.33846
																					1.76144		1.53855			1.49365	1.16098	1.30084
																					1.67649		1.35381			1.49821		1.37956
																					1.60326		1.38739			1.48955		1.28117
																					1.60052		1.36169			1.31206		1.34322
																					1.80894					1.38135		1.259
																					1.93					1.42993		1.29845
																					1.71345					1.38753		1.4195
																					1.6908					1.36587		1.40725
																					1.62023					1.4568		1.30721
																					1.91835					1.2306		1.21623
																					1.85028					1.19878
																					1.76035					1.4588
																					1.77426					1.27648
																					1.74185					1.34772
																					1.72147					1.34065
																					1.97443					1.43067
																					1.83071					1.2444
																					1.82886					1.23455
																					1.77174					1.40492
																					1.74367					0.997851
																					1.70275					1.55811
																					1.60588					1.33452
																					1.53875					1.24129
																					1.83594
																					1.68253
																					1.5096
																					1.85114
																					1.61742
																					1.49025
																					1.96344
																					1.61026
																					1.69833
																					1.69186
																					1.70429
																					1.87318
																					1.87265
																					1.6477
																					1.51049
																					1.70056
																					2.03213
																					1.95538
																					1.50922
																					1.79174
																					1.77703
																					1.7034
																					1.86975
																					1.85004
																					1.57306
																					1.723
																					1.89626
																					1.60127
																					1.83668
																					1.74683
																					1.51363
																					1.81439
																					1.73832
																					1.6043
																					1.85699
																					1.71663

## Sheet: Figure 3
A					B									C					D									E							F							G							H
Female - Relative mRNA levels					Female - Relative mRNA levels									Male - Relative mRNA levels					Male - Relative mRNA levels									Female - Relative mRNA levels							Male - Relative mRNA levels							Female - Raw adult weight							Male - Raw adult weight
F sunRA 1Y	F sunRA 2Y	F sunRB 1Y	F sunRB 2Y		F Gbp1 1Y	F Gbp1 2Y	F Gbp2 1Y	F Gbp2 2Y	F CCHa2 1Y	F CCHa2 2Y	F upd2 1Y	F upd2 2Y		M sunRA 1Y	M sunRA 2Y	M sunRB 1Y	M sunRB 2Y		M Gbp1 1Y	M Gbp1 2Y	M Gbp2 1Y	M Gbp2 2Y	M CCHa2 1Y	M CCHa2 2Y	M upd2 1Y	M upd2 2Y		r4>+ 1Y IIS	r4>+ 2Y IIS	+>sun-RNAi 1Y IIS	+>sun-RNAi 2Y IIS	r4>sun-RNAi 1Y IIS	r4>sun-RNAi 2Y IIS		r4>+ 1Y IIS	r4>+ 2Y IIS	+>sun-RNAi 1Y IIS	+>sun-RNAi 2Y IIS	r4>sun-RNAi 1Y IIS	r4>sun-RNAi 2Y IIS		r4>+ 1Y	r4>+ 2Y	+>sun-RNAi 1Y	+>sun-RNAi 2Y	r4>sun-RNAi 1Y	r4>sun-RNAi 2Y		r4>+ 1Y
87.9828	106.642	88.5723	112.08		92.6903	74.9034	82.6792	143.152	77.4523	168.541	67.0832	181.143		79.2328	110.456	102.404	105.813		70.2122	53.8741	135.149	71.8348	101.961	116.02	130.982	59.256		151.417	56.2867	163.41	84.0291	118.623	112.932		117.328	77.5	122.275	80.9107	73.5439	70.4516		11	13	11	12	10	11		9
88.8052	122.699	102.326	106.181		84.3286	78.5564	119.813	71.1151	102.968	73.9911	86.2718	121.177		100.781	98.2264	96.3514	90.0855		81.1284	71.9185	73.6104	66.1845	95.4192	93.9265	48.8934	53.5464		87.4001	49.7599	72.9679	48.2952	77.5589	113.82		80.8642	80.9417	79.6874	80.2809	96.1551	89.5977		11	12	10	12	10	11		7
138.713	141.164	124.005	112.056		118.511	68.6926	101.423	90.7981	142.288	79.802	165.242	90.9252		136.502	96.1802	101.245	90.5529		130.296	73.9222	92.254	65.0292	97.5902	74.8795	108.211	11.7731		93.466	57.0507	94.548	61.3623	106.828	94.564		101.808	71.6682	99.9284	71.3387	120.392	67.7394		12	12	11	12	10	10		8
87.6886	130.289	85.6678	114.867		104.47	72.6723	96.0848	83.1364	77.291	76.6529	81.4028	64.667		83.4834	93.6281	84.8022	74.3629		60.1228	63.9305	98.9861	54.5119	105.029	76.3421	111.914	167.605		67.7169	49.2432	69.0742	53.8986	96.991	87.0799		100.372	83.9979	98.109	80.3651	109.909	90.7394		11	12	11	12	10	10		8
96.1292	129.944	99.4633	132.111		108.457	105.571	107.964	65.6325	109.588	60.2593	116.66	45.5904		99.7947	101.68	95.8887	90.9589		110.956	86.6258	101.051	107.813	103.335	82.5035	164.815	24.0723		155.778	60.4438	148.989	68.9734	90.4081	113.753		93.6381	89.3963	108.407	125.815	113.56	67.5553		11	13	11	12	10	11		8
85.3702	132.451	83.4728	109.999		76.3647	80.9482	92.0674	52.3454	90.4975	41.3722	85.2627	61.5149		98.1334	115.906	128.409	101.299		106.088	91.9399	113.462	72.8565	91.5448	55.987	72.5664	50.6673		64.625	53.9295	78.5005	45.9391	145.563	90.8738		106.513	84.2656	90.1783	77.8089	71.8598	77.3564		11	12	11	13	10	10		8
113.67	139.231	120.404	112.105		88.0211	77.695	97.9958	64.4935	93.7107	56.69	23.373	103.41		102.072	112.969	90.9001	90.5757		82.9563	90.6385	85.4868	80.7001	105.12	66.3348	62.6185	40.7834		97.6842	59.9724	94.9433	47.3512	81.8133	70.7463		99.4763	61.3346	109.922	68.791	100.984	77.49		11	13	10	12	10	10
101.641	107.018	96.0889	76.7912		127.157		101.973	49.3756	106.204	40.6409	174.704	61.4005			109.09		91.6124			76.5166		66.021		58.125		43.3394		81.9129	59.0173	77.5669	49.6052	82.2155	70.4693		95.6971	92.1938	91.4918	56.444	113.596	58.1939			13	10	12	11	11
																												111.842	47.2439	117.106	60.056	89.0997	102.911		90.0498	72.2317	118.756	48.0743	91.9331	107.751				11	12		10
																												78.6378	72.8955	72.9754	67.4665	65.0389	113.837		114.253	57.6025	87.6893	27.0415	102.005	165.851							11
																												98.5703	39.8967	110.977	55.6359	124.888	100.087		97.907	28.1384	95.9535	65.7394	85.2421	60.6416
																												110.95	51.1262	98.9416	63.906	120.974	83.9836		98.3077	70.4836	97.6014	91.9713	120.819	145.405
																												119.78	44.2276	162.056	73.0016	88.272	117.215		106.777	68.1698	89.6338	45.2947	94.7569	102.098
																												65.5611	69.8102	44.9168	93.5031	101.827	98.1002		97.0085	58.663	101.33	23.7058	97.1534	149.704
																												118.829	42.4071	103.11	57.9434	112.723	82.2232		84.5756	31.6136	102.341	80.6578	82.4668	61.4982
																												95.8295	59.4148	89.917	77.0226	97.178	47.5204		88.3624	72.103	106.696	82.3654	125.623	142.026
																												79.0765	94.9808	82.0839	38.1172	92.5691	143.976		127.062	69.75	86.1642	90.9681	75.6451	105.38
																												120.379	106.772	116.849	28.0686	53.8965	147.785		99.0214	73.279	98.3362	90.6575	109.662	108.396
																												113.301	61.6433	110.737	20.7085	128.249	170.345		72.4238	79.0398	118.254	131.759	80.2283	47.4761
																												87.2436	47.41	90.3301	14.0609	125.285	112.653		118.831	70.0017	97.2456	80.7916	134.465	98.9565
																												81.0582	34.7842	79.6817	34.252	76.4467	138.455		109.723	93.7359	122.597	73.4513	110.631	78.4361
																												116.476	38.6037	107.188	32.4574	87.8756	128.071			83.6348	85.8803		85.4718	66.2059
																												126.416	23.4467	116.9	20.3262	109.172	151.656			90.6507	104.771		78.9285	53.9139
																												76.0497	19.0312	96.2297	14.1194	126.506	102.598			121.646	86.7512		124.968	92.2962
[truncated: 5 more columns]

## Sheet: Figure 4
A					B					C					D					E							F							G
Female - Relative mRNA levels					Female - Relative mRNA levels					Female - Raw adult weight					Male - Raw adult weight					Male - Relative mRNA levels							Male - Relative mRNA levels sunRA							Male - Raw adult weight
F w1118 1Y	F w1118 2Y	F tra1/Df(3L)st-j7 1Y	F tra1/Df(3L)st-j7 2Y		F w1118 1Y	F w1118 2Y	F tra1/Df(3L)st-j7 1Y	F tra1/Df(3L)st-j7 2Y		w1118		tra1/Df(3L)st-j7			w1118		tra1/Df(3L)st-j7			da>+ 1Y IIS	da>+ 2Y IIS	+>traF 1Y IIS	+>traF 2Y IIS	da>traF 1Y IIS	da>traF 2Y IIS		M da>+ 1Y	M da>+ 2Y	M +>traF 1Y	M +>traF 2Y	M da>traF 1Y	M da>traF 2Y		UAS-sun-RNAi/+;r4-GAl4, Df(3L)st-j7/traFKIN		UAS-sun-RNAi/+;r4-GAl4, Df(3L)st-j7/traKO		r4-GAl4, Df(3L)st-j7/traFKIN		r4-GAl4, Df(3L)st-j7/traKO
108.489	95.8762	102.558	110.503		89.6853	113.891	73.603	92.5579		1Y	2Y	1Y	2Y		1Y	2Y	1Y	2Y		102.057	48.5003	111.191	194.864	79.6507	65.4316		38.6686	89.7215	82.5809	159.998	164.392	165.587		1Y	2Y	1Y	2Y	1Y	2Y	1Y	2Y
90.7821	99.7579	83.7292	121.968		115.513	112.765	89.8472	114.943		10	12	10	10		8	8	8	8		117.884	70.3028	88.6867	105.096	82.5423	46.8768		76.962	63.7935	142.447	123.853	64	118.866		10	10	8	9	10	11	8	9
102.057	69.5334	162.148	129.385		99.435	151.972	111.609	92.1389		11	13	10	9		7	9	9	8		78.776	134.7	100.122	123.044	104.805	57.6892		106.624	118.771	74.9723	95.6179	89.0042	198.714		10	9	9	9	9	11	8	8
98.6718	75.1875	107.216	105.021		95.3669	110.099	124.941	116.756		11	12	10	10		8	8	8	9		101.283	101.115	83.061	177.45	133.002	75.8096		177.746	157.178	80.4474	126.663	82.6037	256.715		10	10	9	9	10	11	8	9
115.862	96.1369	84.0645	104.881		80.2612	130.249	105.428	116.987		10	12	9	10		8	8	8	8		86.5879	136.947	103.316	119.683	84.6069	57.4685		82.649	125.226	131.653	214.892	88.0955	286.287		9	9	8	9	9	12	9	9
68.4051	104.327	71.4195	83.1747		98.2797	142.779	76.6552	112.399		10	13	10	11		9	8	9	8		120.42	117.606	99.1321	148.037	90.3205	43.1108		74.1023	94.679	74.6768	116.135	92.7776	208.51		10	10	8	9	10	12	9	8
115.05	121.023	93.6162	137.689		113.049	161.839	96.4558	121.971		10	12	10	9		8	9	8	8		96.6411	164.732	114.491	238.993	102.715	81.7326		97.3297	175.167	113.222		119.189	346.895		9	10	9	9	9	12	8	9
100.683	125.26	95.2478	87.5981		108.41	140.298	121.461	129.387		10	12	9	10		8	8		9		96.3505	211.691	126.752	113.577	122.357	75.7644		145.919	258.365			99.9378	440.882		10	9	9	8	10	11	9	8
128.05	70.4657	164.768	73.9006								13					8				82.98	62.9675	84.1544	148.9	107.801	125.596									9	9	8	9	9	11	8	9
83.8323	71.4597	75.9375	67.6486																	82.0547	71.9856	89.0938	187.515	74.2814	47.3451									10	10	9	9	11	11	9	9
89.9473	67.6081	92.3565	92.2212																	87.573	124.062	117.708	81.3363	104.74	72.8145									10	10		8	10	11		8
98.1706	129.144	66.9378	133.331																	147.392	153.466	58.7319	160.434	113.177	97.7415									10	9
87.8847	56.673	79.3127	81.1366																	67.2511	138.728	111.166	245.027	99.6572	28.8295
101.351	87.0338	88.2941	81.6081																	74.6987	103.696	112.394	122.766	77.4951	58.3936
103.739	65.6657	130.278	105.784																	102.314	151.637	96.664	115.533	111.841	46.9239
107.025	126.375	102.116	191.961																	155.737	311.461	94.5302	155.733	111.006	92.2659
113.672	49.1145	120.968	135.779																	113.121	60.8025	108.806	179.901	107.598	125.124
69.8391	104.24	104.772	118.871																	76.5268	83.6155	85.2087	159.092	101.384	63.4945
96.4515	74.3463	114.344	162.662																	93.3497	121.214	97.2247		72.6191	53.0548
120.037	74.4032	59.9154	104.318																	117.003	150.5	97.6912		118.399	87.9041
94.3962	49.9171	85.1191	102.303																	110.381	186.736	119.875		91.1115	109.847
104.924	64.4879	91.6343	122.263																	75.0864	105.444			105.001	69.0923
92.6704	44.8127	140.011	93.3304																	91.3744	230.434			77.9762	44.2108
108.009	56.7764	83.2361	90.5143																	123.159	276.649			125.912	82.5996

## Sheet: Figure 5
A					B					C					D			E			F					G
Female - Relative mRNA levels					Female - Raw adult weight					Male - Raw adult weight					Male - Relative mRNA levels			Male - Relative mRNA levels			Male - Raw adult weight					Female - Raw adult weight
F w 1Y sun	F w 2Y sun	F srl/+ 1Y sun	F srl/+ 2Y sun		w1118		srl1/+			w1118		srl1/+			M da-tra srl/+ 1Y	M da-tra srl/+ 2Y		M da-tra srl/+ 1Y	M da-tra srl/+ 2Y		da>traF 1Y	da>traF 2Y	da>traF srl1/+ 1Y	da>traF srl1/+ 2Y		da>traF 1Y	da>traF 2Y	da>traF srl1/+ 1Y	da>traF srl1/+ 2Y
95.9456	230.153	116.398	102.723		1Y	2Y	1Y	2Y		1Y	2Y	1Y	2Y		161.48	55.9659		111.826	76.7054		9	11	9	9		12	14	11	12
97.7967	201.784	76.7105	127.337		9	14	11	11		8	7	8	9		47.6017	148.704		63.8824	128.922		9	10	9	10		11	13	11	12
95.8097	194.467	115.619	145.923		10	13	11	11		8	8	8	8		76.3446	163.89		113.538	161.557		9	11	9	10		12	15	12	12
110.448	218.332	91.2718	103.472		10	13	12	10		7	7	8	8		114.574	183.497		110.754	163.365		10	11	10	10		11	14	12	11
108.031	234.521	111.213	128.46		10	13	11	12		7	8	8	8		169.286	57.0468		187.212	89.7473		9	10	9	9		11	14	12	13
111.477	235.838	91.3557	128.423		10	12	11	11			8	9	8		41.8083	127.4		54.3997	166.574		10	11	9	10		12	15	11	13
86.6704	218.71	97.4315	107.478				11	11							68.9367	190.87		69.5298	285.881		9	11				12			12
93.8224	271.155						10	11							119.969	211.323		88.8589	338.831		9
																		143.254	43.6354
																		45.2541	111.877
																		91.573	117.959
																		119.919	97.5307
																		171.925	60.4048
																		43.2471	95.9769
																		73.3776	157.419
																		111.45	242.004
																		111.335	90.7806
																		63.2008	136.582
																		107.488	96.393
																		117.976	115.708
																		136.111	100.401
																		53.6936	136.205
																		90.8774	88.3279
																		119.318	186.396

## Sheet: Figure 6
A					B					C							D					E
Female - Fecundity					Female - Fecundity					Female - Fecundity							Male - Fertility					Male - Fertility
w1118		InRE19/+			w1118		dilp2			r4>+		+>sun-RNAi		r4>sun-RNAi			w1118		pten2L100/+			r4>+		+>sun		r4>sun
1Y	2Y	1Y	2Y		1Y	2Y	1Y	2Y		1Y	2Y	1Y	2Y	1Y	2Y		1Y	2Y	1Y	2Y		1Y	2Y	1Y	2Y	1Y	2Y
13	7	13	10		12	18	2	18		11	18	12	19	12	11		35	44	26	47		28	42	29	11	27	38
9	14	12	18		3	22	33	17		7	15	14	15	11	0		41	36	38	50		31	24	20	24	34	38
11	15	17	11		9	4	8	11		13	16	10	18	9	12		35	33	25	46		39	38	20	24	39	39
12	12	11	18		6	2	16	0		7	22	9	16	13	10		29	47	40	50		31	32	20	32	13	36
11	12	14	24		6	7	20	0		11	17	12	14	14	9		30	53	31	52		31	17	28	16	43	39
13	13	15	16		12	20	0	25		10	21	10	16	18	10		50	40	43	43		20	32	18	8	29	23
14	20	21	14		10	21	18	2		9	14	8	18	16	11		49	40	42	40		21	29	52	31	30	32
0	12	16	13		6	11	14	15		12	19	0	20	20	9		47	44	30	23		37	35	36	7	34	34
11	23	17	23		10	16	10	6		10	23	14	14	11	13		32	45	48	43		33	26	33		30	26
9	13	15	14		16	22	17	15		9	18	12	17	16	10		33	35	30	50		31	24	34		14	25
15	13	15	8		0	16	10	25		5	26	0	19	13	16		43	37	40	49
12	11	9	20		11	20	10	20		11	24	12	16	14	16
11	17	15	19		15	19	11	5		13	20	9	20	8	5
3	18	10	11		15	15	8	4		7	19	11	17	8	15
12	21	0	10		6	20	0	15		12	18	8	16	15	13
10	19	12	7		14	24	7	11		8	17	15	15	14	11
13	25	20	18		19	36	2	16		4	14	10	18	13	14
14	12	13	21		15	20	19	20		15	18	12	19	17	11
15	26	21	10		14	21	16	20		8	12	10	18	23	12
	25	18			14	27	11	9		12	21	13	15	14	15
					17	17	5	0
					14	20	13	17
					9	23	14	8
					13	16	8	13
					12	16	15	8
					16	19	16	23
					7	12	0	16
					11	22	10	16
					6	18		16
						22

## Sheet: Figure 1 - figure supplement 1
A/B							C/D
Raw pupal volume							Raw pupal volume
F w1118 0.5x	F w1118 1x	F w1118 2x	M w1118 0.5x	M w1118 1x	M w1118 2x		F w1118 1Y	F w1118 2Y	M w1118 1Y	M w1118 2Y
1.39192	1.16506	1.73042	0.993467	1.121	1.30139		1.80157	2.13282	1.36718	1.91914
1.31726	1.38755	2.02125	0.852615	1.37521	1.36648		1.75093	1.91708	1.3618	1.51158
1.63032	1.16452	1.8635	0.945469	1.35714	1.3351		1.83179	1.9931	1.46053	1.63377
1.32132	1.74545	1.73152	0.820723	0.97715	1.325		1.88168	1.99136	1.37523	1.23309
1.34286	1.7139	1.95162	1.04492	0.749863	1.23949		1.71676	1.95629	1.4716	1.62119
1.01154	1.2122	1.97655	1.29056	0.929987	1.30859		1.74439	1.98091	1.4407	1.58251
1.19593	1.18387	1.74998	1.00776	1.15188	1.43167		1.83316	2.06501	1.53547	1.61208
1.20294	1.39839	1.78289	1.12779	1.04549	0.940563		1.94667	1.91333	1.44886	1.56137
1.22243	1.18337	1.70862	1.08211	1.0717	1.341		1.76335	2.11082	1.36245	1.60763
1.31492	1.15034	1.73489	0.951889	1.14896	1.25813		1.61641	2.03735	1.3734	1.50008
1.06035	1.47265	1.71822	1.2529	1.25095	1.314		1.80486	2.15999	1.28372	1.59799
1.2309	1.16364	1.621	1.15434	1.30364	1.25435		1.85451	2.12345	1.45289	1.44045
1.52979	1.2952	1.48862	1.21113	0.99578	1.19581		1.64011	2.0984	1.25555	1.6013
1.41473	1.33587	1.95411	0.948805	1.18446	1.40227		1.67944	1.90128	1.51425	1.30178
1.34125	1.20412	1.88595	0.910508	1.16237	1.28619		1.69637	1.97758	1.18968	1.49359
1.30176	1.24812	2.00691	1.02753	1.26699	1.36426		1.93713	2.1645	1.39809	1.4914
1.41729	1.69466	1.60614	0.911065	1.42298	1.21235		1.78399	2.08594	1.40365	1.67355
1.19521	1.45859	1.82458	0.820114	0.974813	1.42669		1.88572	2.11365	1.54512	1.56932
1.5638	1.77147	1.68197	1.12794	1.17456	1.2573		1.7369	1.95957	1.41539	1.49053
1.00827	1.29394	1.68855	0.930492	1.0624	1.25614		1.72397	1.66589	1.40838	1.41694
1.20708	1.23945	1.77522	1.09673	1.3506	1.29427		1.7592	2.09759	1.33751	1.57282
0.953115	1.68421	1.77688	1.14872	1.10098	1.19741		1.70728	2.03704	1.39841	1.60466
1.49493	1.37505	1.63416	0.866026	1.27946	1.29706		1.78762	2.20269	1.40571	1.58853
1.62992	1.6998	1.81358	0.885901	1.29081	1.25237		1.75347	2.06758	1.52432	1.63844
0.90008	1.56326	1.82302	1.13956	1.21594	1.27757		1.66023	1.92762	1.29663	1.4289
1.13305	1.03205	1.83601	0.487651	1.23737	1.40806		1.80151	2.02223	1.02385	1.50866
1.31288	1.78088	1.63616	0.930856	1.14882	1.26328		1.94573	2.12353	1.4405	1.50647
0.969827	1.41302	1.51142	1.12685	1.20235	1.3215		1.80745	1.88111	1.39959	1.56416
0.975353	1.17947	1.91375	0.847015	1.14662	1.30174		1.75431	1.99709	1.34219	1.61876
1.2039	1.35661	1.80555	1.09179	1.14645	1.34081		1.52252	2.00807	1.28174	1.42711
1.61355	1.20238	1.89823	0.975792	1.09234	1.24093		1.74562	2.13165	1.38878	1.50411
1.20602	1.76609	1.60253	0.947874	1.38498	1.22113		1.62549	1.98378	1.33492	1.42257
1.28972	1.64935	1.76365	1.0179	1.04852	1.32928		1.27217	2.0353	1.41612	1.49055
1.12618	1.38623	1.71496	1.08149	1.18135	1.13654		1.71838	2.00921	1.36591	1.61635
1.3716	1.62834	1.6298	1.04302	0.99835	0.920578		1.59295	1.97848	1.25991	1.52081
1.3544	1.49427	1.63658	1.2021	1.11458	1.27288		1.56679	1.8881	1.30268	1.97973
1.31279	1.32988	1.62112	1.09055	1.08096	1.30569		1.72556	1.97881	1.20967	1.54413
1.51978	1.18362	1.63605	0.875058	1.04443	1.28735		1.90291	2.05936	1.42202	1.56632
0.715708	1.4907	1.74411	0.835906	1.08224	1.24558		2.07597	2.05742	1.37265	1.53594
1.10222	1.14444	1.71563	0.973894	1.21972	1.25819		1.48934	1.971	1.28938	1.61989
1.53256	1.30855	1.72675	0.908994	1.03584	1.21687		1.83991	2.01784	1.48723	1.5896
1.15782	1.33442	1.72169	0.923357	1.33505	1.06631		1.63265	1.9499	1.25226	1.51219
1.74359	1.57005	1.7693	0.961461	1.16045	1.15019		1.49032	2.09068	1.23209	1.4017
	1.69533	1.86599	0.768036	1.12068	1.19357		1.72313	2.08979	1.49845	1.49555
	1.70202	1.71533	0.921984	0.948261	1.16185		1.78103	2.00387	1.44668	1.69517
	1.66752	1.54068	1.03313	1.1049	1.29864		1.71981	1.95051	1.29792	1.48321
	1.6396	1.58207	1.04767	1.27412	1.46655		1.93764	2.0848	1.47658	1.48649
	1.40658	1.68751	0.97388	1.26581	1.31106		1.9305	2.0862	1.33987	1.57115
	1.51537	1.73591	0.945318	1.18474	1.30873		1.89119	2.12383	1.55787	1.59787
	1.46974	1.78061		1.17889	1.21004		1.77441	2.06751	1.18496	1.54997
	1.57676	1.76912		1.33312	1.29907		1.94821	2.11268	1.27892	1.63545
	1.24211	1.66633		0.976648	1.34442		1.76994	2.09461	1.48487	1.56263
	1.66558	1.79227		1.15643	1.37399		1.80977	2.02095	1.3426	1.3789
	1.40508	1.61878		1.19507	1.2607		1.78867	1.90652	1.3552	1.60304
	1.63705	1.76479		0.929555	1.06182		1.72853	1.91121	1.37578	1.44414
	1.30786	1.56446		1.11536	1.35116		1.74835	2.23161	1.33873	1.4833
	1.23398	1.74897		1.15792	1.31361		1.87585	2.27355	1.41201	1.54347
	1.36667	1.89811		1.17092	1.38243		1.18743	2.21089	1.32693	1.53736
	1.20881	1.62339		1.01314	1.21492		1.96212	1.88156	1.43562	1.54536
	1.43699	1.62411		1.19053	1.0671		1.86061	1.96155	1.51231	1.41187
	1.03485	1.73231			1.30511		1.66879	1.964	1.49133	1.51683
	1.44623	1.66713			1.22782		1.68723	2.08512	1.25979	1.55225
		1.70066			1.19955			1.85873	1.17777	1.58067
		1.85869			1.21688			2.04341	1.39561	2.0476
		1.83787			1.17081			2.01912	1.39713	1.40312
		1.77259			1.22067			2.10817	1.33397	1.58304
		1.74385			1.2006			1.92919	1.3791	1.53965
		1.60963			1.30487			2.08876	1.50469	1.54246
		1.7659			1.27142			1.98555	1.40619	1.62288
		1.74838			1.21318				1.3389	1.54325
		1.68057			1.49897				1.47023	1.61868
		1.64679			1.37103				1.5144	1.51515
		1.55866			1.34324				1.50682	1.53473
		1.69048			1.17687				1.52253
		1.72682			1.19542				1.46523
		1.6605			1.28711				1.39196
		1.79912			1.20157				1.398
		1.83808			1.24811				1.43434
		1.81269			1.2525				1.37805
		1.80183			1.16602				1.41511
		2.06333			1.38092
		1.61131			1.20945
		1.57986			1.3219
		1.74903			1.23799
		1.4031			1.16965
		1.76202			1.30644
		1.70892			1.2747
		1.82416			1.22443
		1.67486			1.15244
		1.71313			1.11587
		1.78695			1.24831
		1.67814			1.2518
		1.53858			1.19612
		1.63348			1.16915
		1.63343			1.18579
		1.73836			1.29157
		1.60128			1.19844
		1.67931			1.39695
		1.56679			1.39193
		1.63901			1.24318

## Sheet: Figure 1 - figure supplement 2
A/B
Raw pupal volume
F CantonS 1Y	F CantonS 2Y	M CantonS 1Y	M CantonS 2Y
1.99828	1.94284	1.41484	1.54838
1.68619	2.16296	1.30225	1.67573
1.74315	1.97737	1.42267	1.74766
1.75117	2.19106	1.61526	1.52393
1.73333	1.98868	1.51485	1.55005
1.82183	1.95746	1.35974	1.62735
1.55349	2.00905	1.46385	1.54999
1.77342	2.24668	1.36471	1.73261
1.67326	2.03842	1.3685	1.5974
1.96739	1.95602	1.50949	1.49236
1.781	2.10081	1.36913	1.67419
1.99146	2.14496	1.45898	1.66463
1.96538	2.19175	1.38129	1.56462
1.70717	1.9994	1.4269	1.49189
1.84698	2.12401	1.50937	1.66335
1.63251	1.98935	1.54103	1.73637
1.8477	2.03163	1.55197	1.68353
1.92419	2.26886	1.47361	1.76557
1.60543	1.99828	1.42169	1.65677
1.81385	2.13117	1.49962	1.67907
1.86725	2.09234	1.51406	1.57455
1.69996	1.97606	1.38394	1.556
1.72945	1.90145	1.48383	1.63226
1.77885	2.10197	1.41978	1.60083
1.70608	2.00778	1.44166	1.6134
1.89233	2.03169	1.32707	1.66713
1.76559	1.97653	1.50942	1.49604
1.45679	2.35621	1.43506	1.57709
1.9407	1.92002	1.33881	1.60305
1.86099	2.25975	1.51161	1.54912
1.68597	1.965	1.41331	1.6781
1.7491	1.98795	1.40519	1.64425
1.7136	2.1338	1.52903	1.62983
1.93093	1.97205	1.70705	1.60389
1.97469	2.08558	1.60188	1.56027
1.54878	2.34164	1.47555	1.71207
2.05427	2.16299	1.37914	1.67444
1.93559	2.06769	1.42673	1.64337
1.77423	2.00245	1.46821	1.49639
1.57415	2.09929	1.42031	1.76086
1.83151	2.34845	1.37298	1.65946
1.61774	2.17678	1.51553	1.52364
1.97612	1.95307	1.77695	1.6518
1.90401	1.93639	1.84359	1.62111
1.96611	1.97825	1.64448	1.67219
1.56803	2.04761	1.61643	1.58006
1.75554	2.07629	1.5521	1.56898
2.04309	2.14913	1.43389	1.54041
1.92893	1.95854	1.50606	1.61265
1.67942	2.02426	1.44715	1.64015
1.82959	1.8599	1.41392	1.64772
1.70621	2.37849	1.76764	1.55784
1.67247	1.96884	1.33598	1.56354
1.90519	2.18904	1.27487	1.67597
1.73231	2.21767	1.4533	1.69034
1.6733	2.07286	1.50719	1.62503
1.73457	1.77108	1.61296	1.59656
1.84486		1.51433	1.70411
1.93045		1.65759	1.59967
1.65659		1.50281	1.66524
1.69023		1.33863	1.5956
1.86376		1.42293	1.62403
1.83022		1.45859	1.7173
1.66678		1.51864	1.56675
1.94382		1.30458	1.54913
1.85111		1.35926	1.72676
1.64253		1.35359	1.68483
1.76909		1.39891	1.58003
1.99081		1.40396	1.33127
1.82846		1.50451	1.64228
2.36634		1.43824	1.64642
2.10647		1.42907	1.55439
1.69609		1.36309	1.4548
1.61277		1.58867	1.59706
1.95153		1.57068	1.63658
1.71168		1.7395	1.53154
1.91631		1.57375	1.62062
1.83512		1.47211	1.60966
1.96779		1.46159	1.62952
1.59089		1.51934	1.58121
1.79686		1.37598	1.68573
1.89702		1.38939	1.73996
1.81508		1.4087
1.71839		1.3809
1.8451		1.49596
1.67849		1.39123
1.70323		1.42449
1.64599		1.5691
2.00084		1.47341
1.59273		1.72013
1.64106		1.69118
1.73283		1.49515
1.55941		1.43409
		1.41107
		1.35322

## Sheet: Figure 1 - figure supplement 3
A
Raw wing length
F w1118 1Y	F w1118 2Y	M w1118 1Y	M w1118 2Y
1.34856	1.48105	1.28527	1.26752
1.42939	1.4757	1.2228	1.28782
1.3397	1.50094	1.26498	1.33825
1.40822	1.47729	1.25861	1.28356
1.3923	1.51141	1.26313	1.30842
1.39746	1.46893	1.23211	1.29567
1.37712	1.46127	1.2828	1.31495
1.44206	1.45207	1.29598	1.25551
1.39487	1.50481	1.24581	1.29941
1.37561	1.4789	1.25584	1.28929
1.44085	1.5029	1.33229	1.30276
1.44609	1.49612	1.24342	1.30713
1.40354	1.47705	1.25592	1.19298
1.39282	1.50975	1.27546	1.31179
1.4262	1.49077	1.2553	1.31195
1.43032	1.49183	1.29399	1.31862
	1.41493	1.29001	1.26992
	1.45016	1.25916	1.32453
	1.46105	1.2252	1.33348
	1.50653	1.24485	1.26049
	1.48707	1.27478	1.2645
			1.29609
			1.33082
			1.32187
			1.28842
			1.27284
			1.2863
			1.35385

## Sheet: Figure 1 - figure supplement 4
A					B
Raw pupal volume					Raw pupal volume
1S	2S	1S	2S		1Y cal	2Y cal	1Y cal	2Y cal
1.73858	1.82442	1.40714	1.36532		1.91027	1.7402	1.37891	1.44739
1.66214	1.75607	1.30474	1.24129		1.92089	1.70442	1.43088	1.19714
1.76184	1.58288	1.44063	1.22223		1.67296	1.62398	1.44704	1.29107
1.90852	1.59613	1.27314	1.10266		1.98209	1.70878	1.51293	1.35298
1.62204	1.63627	1.429	1.31088		1.83075	1.58124	1.39421	1.51121
1.70706	1.79682	1.28898	1.22943		1.93848	1.8236	1.4391	1.51136
1.74541	1.72318	1.36316	1.24713		1.78645	1.72325	1.58529	1.24112
1.93966	1.75636	1.2831	1.22504		1.91171	1.70484	1.45263	1.28016
1.55514	1.73996	1.27977	1.30456		1.77778	2.06629	1.51165	1.37976
2.03214	1.67912	1.4354	1.25517		1.9188	1.81131	1.38389	1.25256
1.70627	1.65336	1.46293	1.28439		1.79386	1.78385	1.45613	1.25022
1.60997	1.69657	1.30851	1.35566		2.04374	1.72019	1.39121	1.23274
1.54673	1.68331	1.3137	1.21409		2.07739	1.7591	1.43786	1.40218
1.64	1.68743	1.35169	1.26059		1.95431	1.84511	1.38468	1.50169
1.75088	1.84157	1.27158	1.43735		1.82209	1.88273	1.31459	1.36811
1.82345	1.77612	1.25469	1.28523		2.1203	1.52481	1.39751	1.26092
1.89644	1.72811	1.3631	1.36516		1.95914	1.84759	1.48041	1.61142
1.80493	1.58393	1.27569	1.24747		1.92082	1.81901	1.34704	1.35606
1.75726	1.80144	1.40373	1.36097		1.70019	1.73327	1.30809	1.39699
1.78922	1.72959	1.38026	1.17171		1.81878	1.82109	1.3854	1.30412
1.80909	1.69858	1.23525	1.31602		1.96938	1.55207	1.35518	1.35928
1.75899	1.76372	1.24478	1.31759		1.89729	2.01718	1.4636	1.35459
1.58567	1.53309	1.24701	1.16529		1.84158	1.82128	1.39353	1.33098
1.95992	1.69766	1.254	1.36307		1.95366	1.81522	1.37137	1.47097
1.82647	1.68398	1.28002	1.27118		1.53498	1.6598	1.35163	1.2748
1.75388	1.78261	1.40762	1.25359		1.50621	1.72931	1.48299	1.24027
1.53162	1.75673	1.27182	1.28971		1.87121	1.79631	1.44969	1.56382
1.80536	1.66725	1.26174	1.26073		1.78533	1.82901	1.37892	1.41519
1.88199	1.48599	1.32519	1.25872		1.99149	1.61346	1.41011	1.3942
1.82269	1.71839	1.39362	1.26327		1.80266	1.7829	1.47398	1.32088
1.73242	1.80683	1.43742	1.31322		1.45402	1.85462	1.35125	1.36126
1.66278	1.58354	1.35265	1.21996		1.50275	1.86707	1.48837	1.32504
1.63991	1.72349	1.2446	1.39526		1.71575	1.58731	1.34441	1.39904
1.71621	1.58083	1.26418	1.21174		2.0022	1.74652	1.43444	1.37372
1.74801	1.46567	1.37732	1.20788		1.86349	1.84613	1.52	1.25382
1.70995	1.70221	1.3729	1.42967		1.90358	1.95	1.55277	1.31591
2.02876	1.67409	1.33365	1.20735		1.87578	1.68174	1.28474	1.39417
1.82325	1.70826	1.27193	1.41027		1.80604	1.89811	1.36808	1.39895
1.61054	1.86722	1.37148	1.34506		1.91592	2.04802	1.54937	1.32199
1.75319	1.68723	1.43243	1.20987		1.82415	1.90167	1.50202	1.27186
1.70772	1.73784	1.33635	1.22148		1.98005	1.78422	1.4496	1.39207
1.86614	1.8885	1.47497	1.23774		1.88582	1.87882	1.68702	1.38857
1.76001	1.62	1.40795	1.41368		1.85982	1.81359	1.45322	1.39675
1.81375	1.67058	1.31161	1.30721		1.89025	1.83999	1.52917	1.51385
1.83241	1.50984	1.38916	1.21467		1.92959		1.43367	1.35912
1.74165	1.63633	1.31592	1.25667		1.8837		1.51403	1.30004
1.64109	1.61519	1.44616	1.41251		1.75871		1.50866	1.4971
1.6972	1.57348	1.3721	1.22897		1.83768		1.37581	1.34434
1.81134	1.70452	1.35611	1.32285		1.776		1.44753	1.45308
1.70063	1.75561	1.40729	1.29198		1.7817		1.49796	1.44214
1.68409	1.69646	1.19587	1.33593		1.99066		1.53798	1.72193
1.72482	1.66807	1.34262	1.21607		1.98458		1.63992	1.43527
1.70354	1.50421	1.29813	1.35543		1.78641		1.24063	1.40913
1.77543	1.77895	1.34971	1.40448		2.00046		1.38484	1.34171
1.59411	1.82786	1.25401	1.27355		1.81256		1.49596	1.5063
1.80768	1.67888	1.34473	1.45506		2.10822		1.4156	1.4957
1.71772	1.6527	1.43868	1.22947		2.07018		1.29354	1.29564
1.82005	1.61331	1.30508	1.26351		1.89502		1.39613	1.3674
1.63227	1.68171	1.31448	1.26928		1.94431		1.31777	1.41207
1.77235	1.54445	1.30721	1.40808		1.96183		1.42775	1.30957
1.65175	1.66557	1.30025	1.25717		1.90771		1.21863	1.37104
1.86407	1.73906	1.24005	1.20362		1.85011		1.56875	1.55455
1.57113	1.6899	1.33865	1.45507		1.85796		1.50302	1.30382
1.89847	1.90779	1.47748	1.37124		1.94328		1.35804	1.31567
1.73742	1.58491	1.23105	1.41358		1.7021		1.29524	1.43773
1.88559	1.89174	1.45142	1.26236		1.97719		1.36246	1.39545
1.83412	1.66285	1.31298	1.18935		1.70322		1.41642	1.48164
1.69028	1.79816	1.43412	1.26187		1.91825			1.40119
1.81563	1.91049	1.52372	1.20421		1.85345			1.41526
1.45962	1.60004	1.46344	1.35085		1.75955			1.37392
1.66494	1.7678	1.46244	1.24943		1.73506
1.90251	1.72766	1.15654	1.36146		1.62527
1.74589	1.74696	1.45088	1.27018		1.72865
1.64522	1.7134	1.333	1.31254		1.89417
1.68811	1.65027	1.42598	1.24938
1.89588	1.73103	1.31406	1.23068
1.74611	1.71037	1.28039	1.21836
1.76833	1.48036	1.37129	1.45203
1.76326	1.64502	1.29006	1.33751
1.77088	1.5151	1.31165	1.26462
1.80546	1.52487	1.30823	1.30608
1.85024	1.75365	1.31993	1.36336
1.80226	1.56897	1.31368	1.42791
1.66023	1.85385	1.32973	1.17054
1.81563	1.71958	1.26694	1.32039
1.87671	1.63865	1.38375	1.35058
1.58871	1.68519	1.31644	1.27956
1.84948	1.66328	1.30818	1.37938
1.80346	1.65752	1.31072	1.19985
1.8369	1.71751	1.30794	1.26741
1.78683	1.61851	1.26292	1.33365
1.83418	1.59507	1.28862	1.21409
1.77191	1.5355	1.41919	1.17571
1.89667	1.72461	1.25811	1.30221
1.81268	1.71035	1.3713	1.36257
1.87949	1.6459	1.39612	1.28626
1.72003	1.66852	1.38891	1.34511
1.73376	1.5413	1.48028	1.2646
1.52143	1.62107	1.34012	0.98512
1.81279	1.77814	1.3229	1.30417
1.56955	1.77788	1.20185	1.29152
1.60762	1.79589	1.29537	1.36314
1.73848	1.67169	1.39814	1.31313
1.55222	1.60882	1.3779	1.31428
1.80255	1.71272	1.3288	1.35545
1.61673	1.56889	1.4139	1.29039
1.67864	1.60953	1.39329	1.27397
1.80625	1.69596	1.29499	1.32238
1.58526	1.86171	1.19527	1.22528
1.74888	1.71549	1.30744	1.34115
1.89015	1.61199	1.15962	1.41382
1.78355	1.658	1.21469	1.33694
1.83958	1.85492	1.43438	1.23574
1.56855	1.78078	1.49691	1.27511
1.77822	1.57174	1.30958	1.21405
1.60193	1.67567	1.5053	1.26558
1.32938	1.72221	1.35022	1.17524
1.70429	1.64398	1.33038
1.61271	1.6674	1.47215
	1.7698	1.26686
	1.65169	1.30734
	1.57516
	1.60187
	1.59879
	1.69978
	1.65992
	1.69679
	1.71123
	1.64774
	1.68469
	1.79629
	1.63272
	1.59928

[truncated: 20 more sheets: Figure 1 - figure supplement 5, Figure 1 - figure supplement 6, Figure 1 - figure supplement 7, Figure 2 - figure supplement 1, Figure 2 - figure supplement 2, Figure 2 - figure supplement 3, Figure 2 - figure supplement 4, Figure 3 - figure supplement 1, Figure 3 - figure supplement 2, Figure 3 - figure supplement 3, Figure 3 - figure supplement 4, Figure 3 - figure supplement 5, Figure 3 - figure supplement 6, Figure 3 - figure supplement 7, Figure 3 - figure supplement 8, Figure 4 - figure supplement 1, Figure 4 - figure supplement 2, Figure 4 - figure supplement 3, Figure 5 - figure supplement 1, Figure 5 - figure supplement 2]
