# Supplementary material for: Female-biased upregulation of insulin pathway activity mediates the sex difference in Drosophila body size plasticity
Source: eLife journal article supplement (doi:10.7554/elife.58341), 2021-01-15
Supplement: supp [file elife-58341-supp-v1.zip › elife_poa_e58341_Supplementary_file_3.xlsx]

## Sheet: Sheet1
Fly Food Recipe (per L)
Ingredient	1S	1Y Calories
H2O (L)	1	1
Sucrose (g)	10.25	20.5
D-glucose (g)	35.45	70.9
Cornmeal (g)	48.5	28.6
Yeast (g)	45.3	45.3
Agar (g)	4.6	4.6
CaCl2 (g)	0.5	0.5
MgSO4 (g)	0.5	0.5
Ingredient	Calories per g	Class
Sucrose (g)	3.75	Carbohydrate
D-glucose (g)	3.4	Carbohydrate
Cornmeal (g)	37	Carbohydrate
Yeast (g)	32.5	Protein
