# Supplementary material for: Female-biased upregulation of insulin pathway activity mediates the sex difference in Drosophila body size plasticity
Source: eLife journal article supplement (doi:10.7554/elife.58341), 2021-01-15
Supplement: supp [file elife-58341-supp-v1.zip › elife_poa_e58341_Supplementary_file_4.xlsx]

## Sheet: Sheet1
Figure	Genotype	Notes.
Figure 1.	w1118
	w*;GFP-PH
	w1118;;InRE19/+
Figure 2.	w1118
	w1118;;dilp2/dilp2
	da-GAL4/+
	UAS-dilp2-RNAi/+
	da-GAL4/UAS-dilp2-RNAi
Figure 3.	w1118
	w1118;;r4-GAL4/+
	w1118;UAS-sun-RNAi/+
	w1118;UAS-sun-RNAi/+; r4-GAL4/+
Figure 4.	w1118
	w1118;;tra1/Df(3L)st-j7	Females marked by X linked ubi-GFP transgene
	w1118;;da-GAL4/+	Females marked by X linked ubi-GFP transgene
	w1118;UAS-traF/+	Females marked by X linked ubi-GFP transgene
	w1118;UAS-traF/+;da-GAL4/+	Females marked by X linked ubi-GFP transgene
	w1118/BsY;UAS-sun-RNAi/+;r4-GAl4, Df(3L)st-j7/traFKIN	Sexed as pupae by presence of BsY and eye colour (traF K-IN mw+, traKO mw-)
	w1118/BsY;UAS-sun-RNAi/+;r4-GAl4, Df(3L)st-j7/traFKO	Sexed as pupae by presence of BsY and eye colour (traF K-IN mw+, traKO mw-)
	w1118/BsY;r4-GAl4, Df(3L)st-j7/traFKIN	Sexed as pupae by presence of BsY and eye colour (traF K-IN mw+, traKO mw-)
	w1118/BsY;r4-GAl4, Df(3L)st-j7/traFKO	Sexed as pupae by presence of BsY and eye colour (traF K-IN mw+, traKO mw-)
Figure 5.	w1118
	srl1/+
	w1118;UAS-traF/+;da-GAL4/+	Females marked by X linked ubi-GFP transgene
	w1118;UAS-traF/+;da-GAL4/srl1	Females marked by X linked ubi-GFP transgene
Figure 6.	w1118
	w1118;;InRE19/+
	w1118;;dilp2/dilp2
	w1118;;r4-GAL4/+
	w1118;UAS-sun-RNAi/+
	w1118;UAS-sun-RNAi/+; r4-GAL4/+
	w1118;pten2L100/+
	w1118;UAS-sun/+
	w1118;UAS-sun/+;r4-GAL4/+
Figure 1 - figure supplement 1	w1118
Figure 1 - figure supplement 2	Canton-S
Figure 1 - figure supplement 3	w1118
Figure 1 - figure supplement 4	w1118
Figure 1 - figure supplement 5	w1118
Figure 1 - figure supplement 6	w1118
Figure 1 - figure supplement 7	w1118
	w1118;pten2L100/+
Figure 2 - figure supplement 1	w1118
	w1118;;dilp2/dilp2
Figure 2 - figure supplement 2	yw
	yw;;ilp2HF
Figure 2 - figure supplement 3	w1118
	w1118;;dilp2/dilp2
Figure 2 - figure supplement 4	w1118
Figure 3 - figure supplement 1	w1118
Figure 3 - figure supplement 2	w1118;;r4-GAL4/+
	w1118;UAS-sun-RNAi/+
	w1118;UAS-sun-RNAi/+; r4-GAL4/+
Figure 3 - figure supplement 3	w1118;;r4-GAL4/+
	w1118;UAS-sun-RNAi/+
	w1118;UAS-sun-RNAi/+; r4-GAL4/+
Figure 3 - figure supplement 4	w1118;;r4-GAL4/+
	w1118;UAS-sun-RNAi/+
	w1118;UAS-sun-RNAi/+; r4-GAL4/+
Figure 3 - figure supplement 5	w1118
	mth1
	w1118, elav-GAL4;;
	w1118;UAS-mth-RNAi/+
	w1118, elav-GAL4; UAS-mth-RNAi/+
	w1118;;dilp2-GAL4/+
	w1118;UAS-mth-RNAi/+; dilp2-GAL4/+
Figure 3 - figure supplement 6	w1118;cg-GAL4/+
	w1118;UAS-sun-RNAi/+
	w1118;cg-GAL4/UAS-sun-RNAi
	w1118;;r4-GAL4/+
	w1118;UAS-sun-RNAi/+; r4-GAL4/+
	w1118;UAS-Gbp1-RNAi/+
	w1118;UAS-Gbp1-RNAi/+; r4-GAL4/+
	w1118;UAS-Gbp2-RNAi/+
	w1118;UAS-Gbp2-RNAi/+; r4-GAL4/+
	w1118;UAS-CCHa2-RNAi/+
	w1118;UAS-CCHa2-RNAi/+; r4-GAL4/+
	;;UAS-upd2-RNAi/+
	;;r4-GAL4/UAS-upd2-RNAi
Figure 3 - figure supplement 7	w1118;;r4-GAL4/+
	w1118;UAS-sun/+
	w1118;UAS-sun/+;r4-GAL4/+
Figure 3 - figure supplement 8	w1118;;r4-GAL4/+
	w1118;UAS-sun/+
	w1118;UAS-sun/+;r4-GAL4/+
Figure 4 - figure supplement 1	w1118
	w1118;;tra1/Df(3L)st-j7
	w1118;;traKO/traKO
Figure 4 - figure supplement 2	r4-GAL4, Df(3L)st-j7/+
	UAS-sun/+;traKO/+
	r4-GAL4, Df(3L)st-j7/traKO
	UAS-sun/+;traKO/Df(3L)st-j7
	UAS-sun/+;traKO/r4-GAL4, Df(3L)st-j7
Figure 4 - figure supplement 3	w1118;;da-GAL4/+
	w1118;UAS-traF/+
	w1118;UAS-traF/+;da-GAL4/+
	w1118
	w1118;;traKO/traKO
	w1118;;traF K-IN/traF K-IN
	w1118/BsY;UAS-sun-RNAi/+;r4-GAl4, Df(3L)st-j7/traFKIN
	w1118/BsY;UAS-sun-RNAi/+;r4-GAl4, Df(3L)st-j7/traFKO
	w1118/BsY;r4-GAl4, Df(3L)st-j7/traFKIN
	w1118/BsY;r4-GAl4, Df(3L)st-j7/traFKO
Figure 5 - figure supplement 1	w1118
	w1118;;r4-GAL4/+
	w1118;UAS-rheb/+
	w1118;UAS-rheb/+;r4-GAL4/+
	w1118;;traKO/traKO
Figure 5 - figure supplement 2	w1118
	w1118;;tra1/Df(3L)st-j7
	w1118;;r4-GAL4/+
	w1118;UAS-cyt-c-p-RNAi/+
	w1118;UAS-UAS-cyt-c-p-RNAi/+;r4-GAL4/+
	w1118;UAS-Idh-RNAi/+
	w1118;UAS-Idh-RNAi/+;r4-GAL4/+
