# Supplementary material for: Female-biased upregulation of insulin pathway activity mediates the sex difference in Drosophila body size plasticity
Source: eLife journal article supplement (doi:10.7554/elife.58341), 2021-01-15
Supplement: supp [file elife-58341-supp-v1.zip › elife_poa_e58341_Supplementary_file_5.xlsx]

## Sheet: Sheet1
Primer	Forward sequence (5'-3')	Reverse sequence (5'-3')
InR	GCTGCATCTCCTGTCGAAAT	CGTTGGACAGTGGGTGATAC
bmm	GTCCCTTCAGTCCCTCCTTC	TATGAAGCACGCACACAACA
4E-BP	GCTAAGATGTCCGCTTCACC	CCTCCAGGAGTGGTGGAGTA
sunRA	GGGTTTGACGCTGAGCTG	CATTTTGCGCGAGTCCTT
sunRB	CTTTCATGAGCTGGCTTGC	CATTTTGCGCGAGTCCTT
dilp1	CCCCGGAAACCACAAACTCT	TAAAGCCATGGGGACACACC
dilp2	TCCACAGTGAAGTTGGCCC	AGATAATCGCGTCGACCAGG
dilp3	AGAGAACTTTGGACCCCGTGAA	TGAACCGAACTATCACTCAACAGTCT
dilp4	GCGGAGCAGTCGTCTAAGGA	TCATCCGGCTGCTGTAGCTT
dilp5	GAGGCACCTTGGGCCTATTC	CATGTGGTGAGATTCGGAGCTA
dilp6	CGATGTATTTCCCAACAGTTTCG	AAATCGGTTACGTTCTGCAAGTC
dilp7	CAAAAAGAGGACGGGCAATG	GCCATCAGGTTCCGTGGTT
dilp8	GGACGGACGGGTTAACCATT	CATCAGGCAACAGACTCCGA
Gbp1	CATCCTACCGCTGGTCTTCC	ACTGGCAGCACAGTGGTGTT
Gbp2	ACTTCAGCTCGTCCCCAGAA	ACGGTTGACGACCTCCTGAT
CCHa2	GCCTACGGTCATGTGTGCTAC	ATCATGGGCAGTAGGCCATT
upd2	GCGCGGTGGGTTATATCTT	ATCAGAGATCCCGGAGTGG
GAL4	CACCGACGCTAATGATGTTG	TGGAACCTGACTCGAAGACC
cyt-c-p	CTGGTGATGTTGAGAAGGGAAAG	AGATTGGGTCCAACCTTGTGC
Idh	TTGAGCTGCATACCTACGATCT	TCAGCACAGTCAATGGTGACC
blw	CCGTTTCCGTGTGGGAATCAA	AGAGCGGTCTTACCAGTCTGA
