# Supplementary figures and images for: Female-biased upregulation of insulin pathway activity mediates the sex difference in Drosophila body size plasticity
Source: eLife journal article supplement (doi:10.7554/elife.58341), 2021-01-15

# Figure 3 - figure supplement 1

**A**

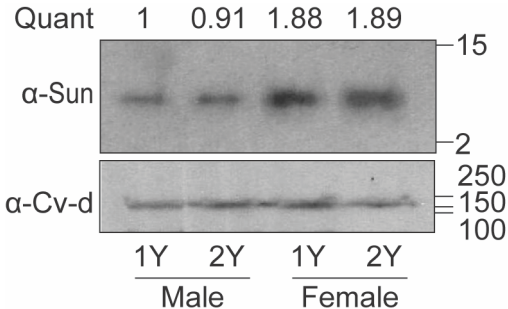

Supplement: supp [file elife-58341-supp-v1.zip]

**Figure 1 - figure supplement 4**

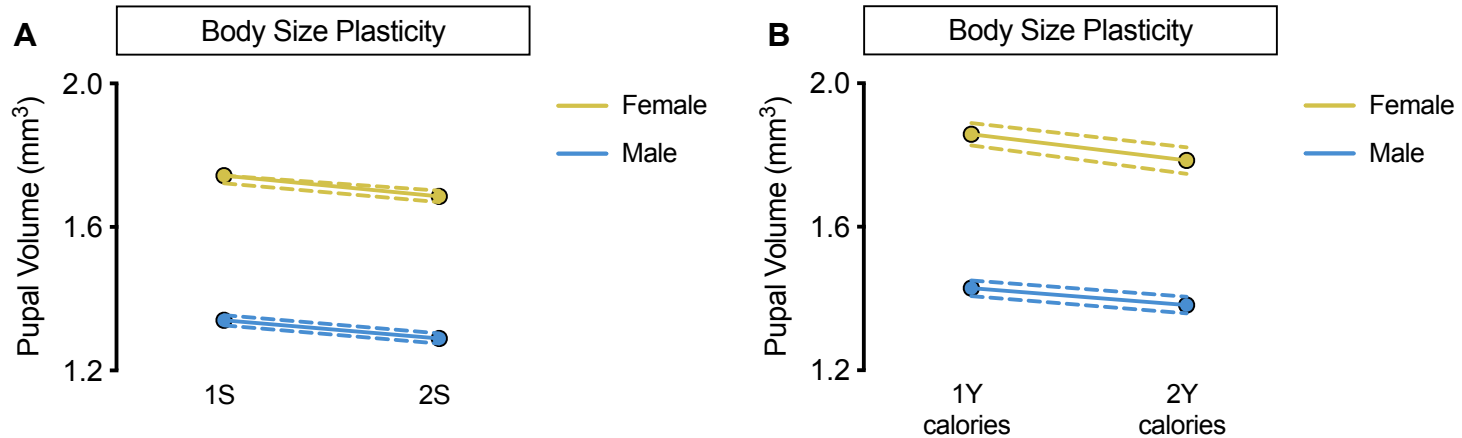

Supplement: supp [file elife-58341-supp-v1.zip]

**Figure 4 - figure supplement 1**

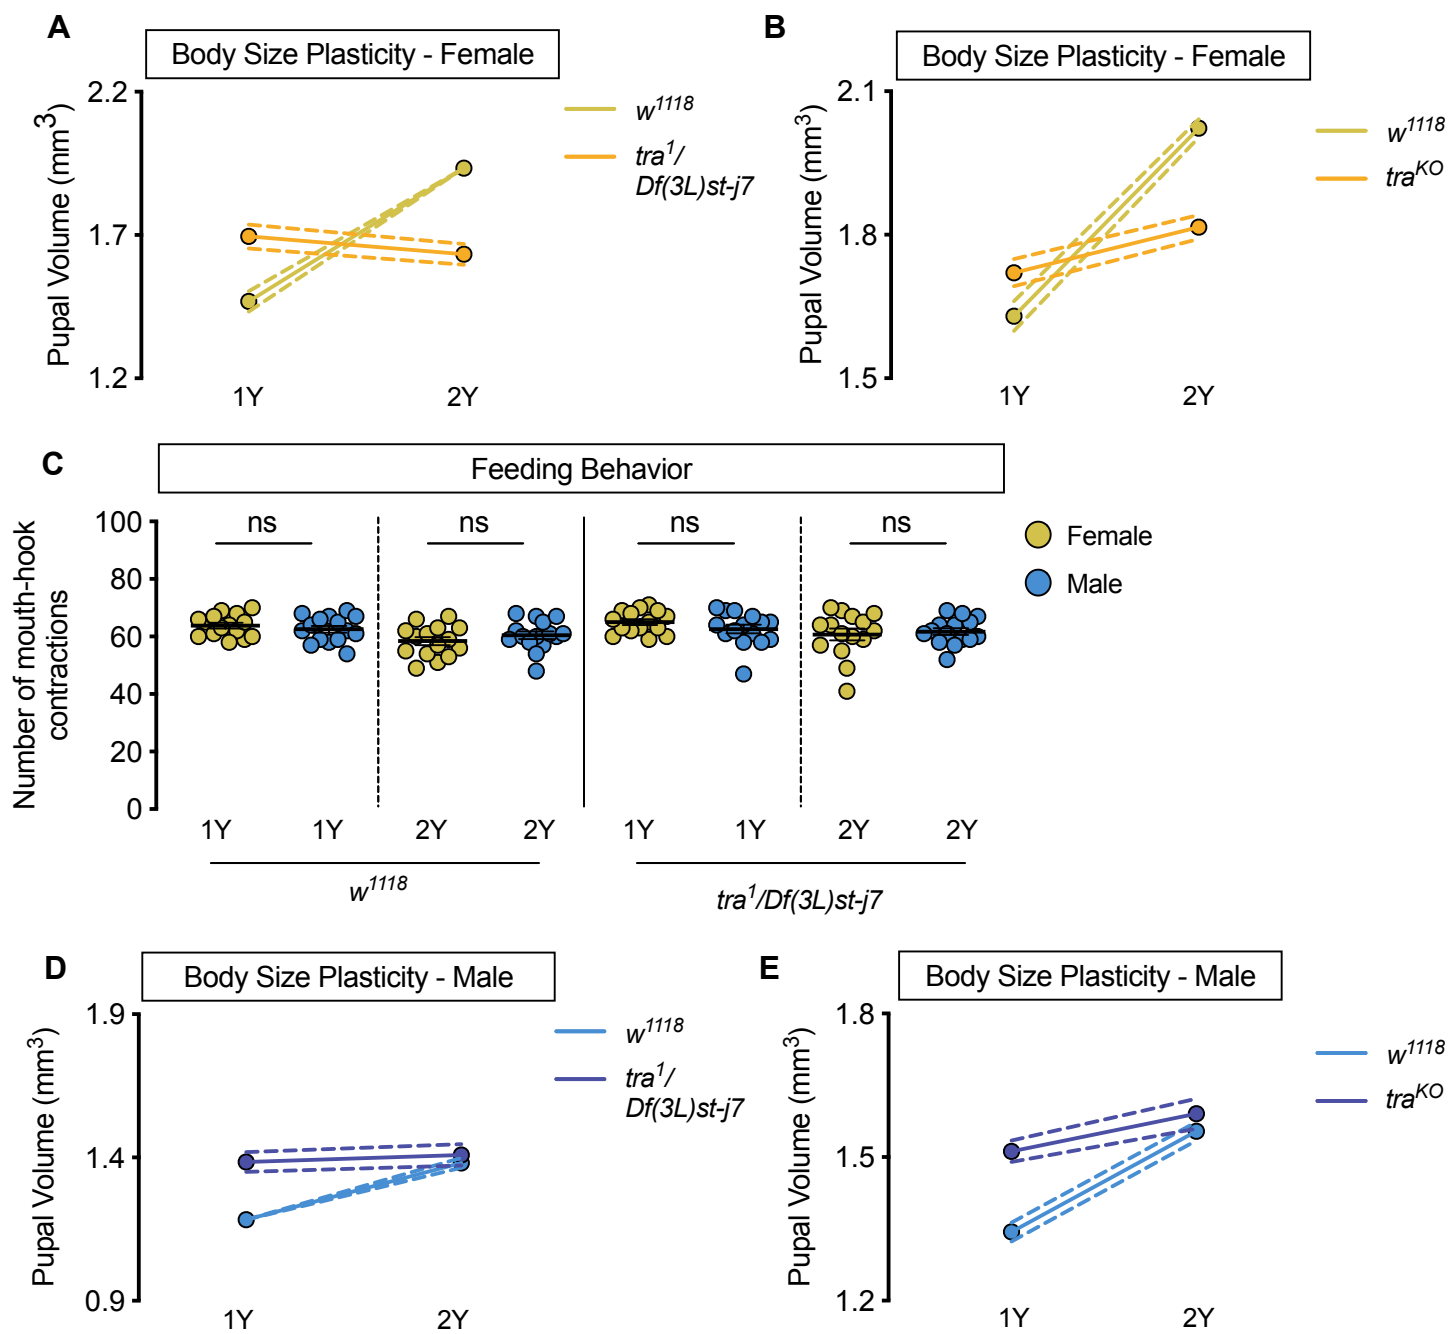

Supplement: supp [file elife-58341-supp-v1.zip]

**Figure 3 - figure supplement 8**

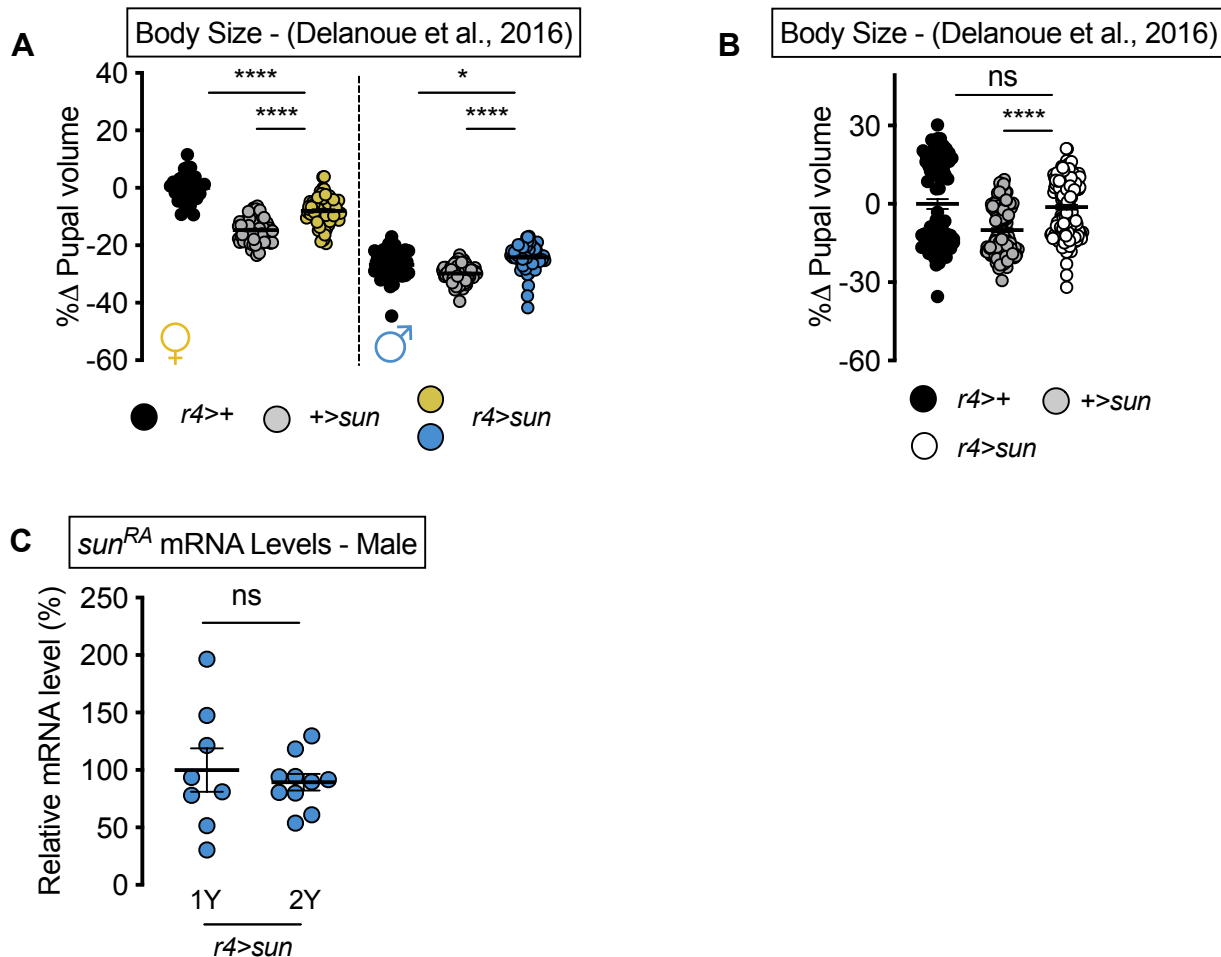

Supplement: supp [file elife-58341-supp-v1.zip]

**Figure 2 - figure supplement 3**

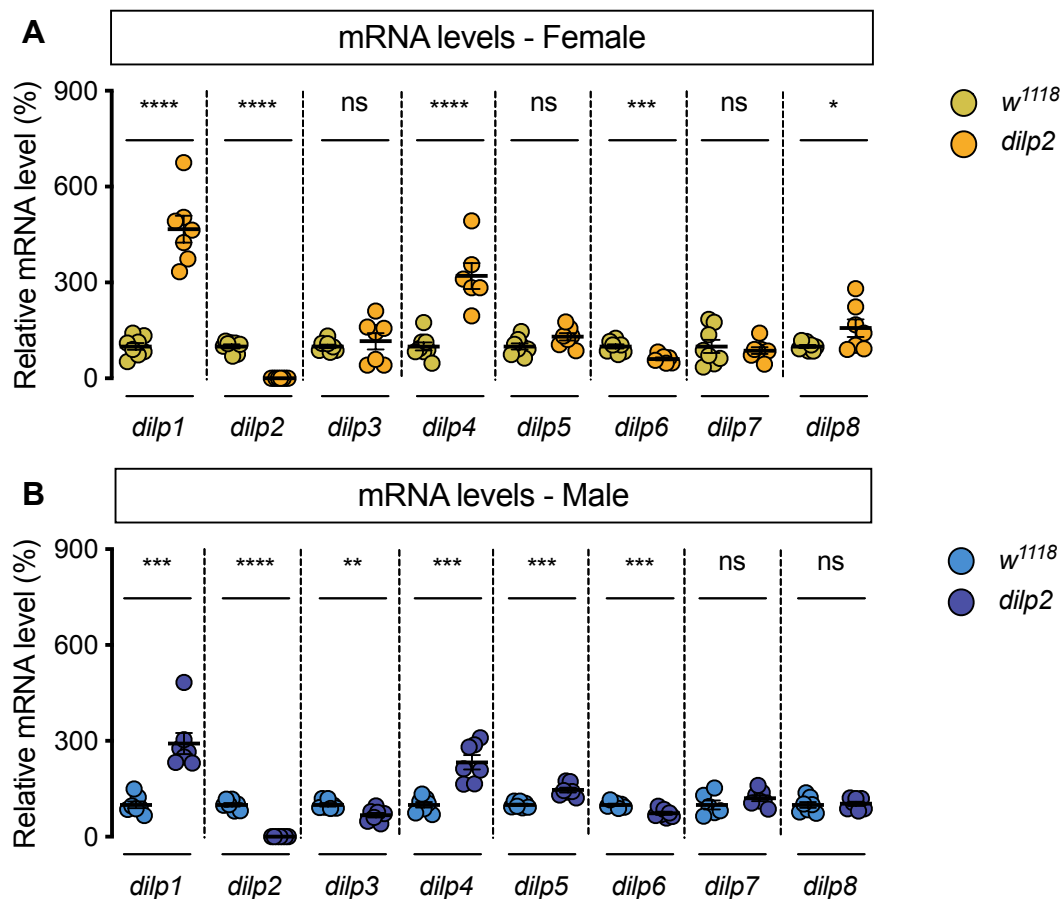

Supplement: supp [file elife-58341-supp-v1.zip]

**Figure 2 - figure supplement 2**

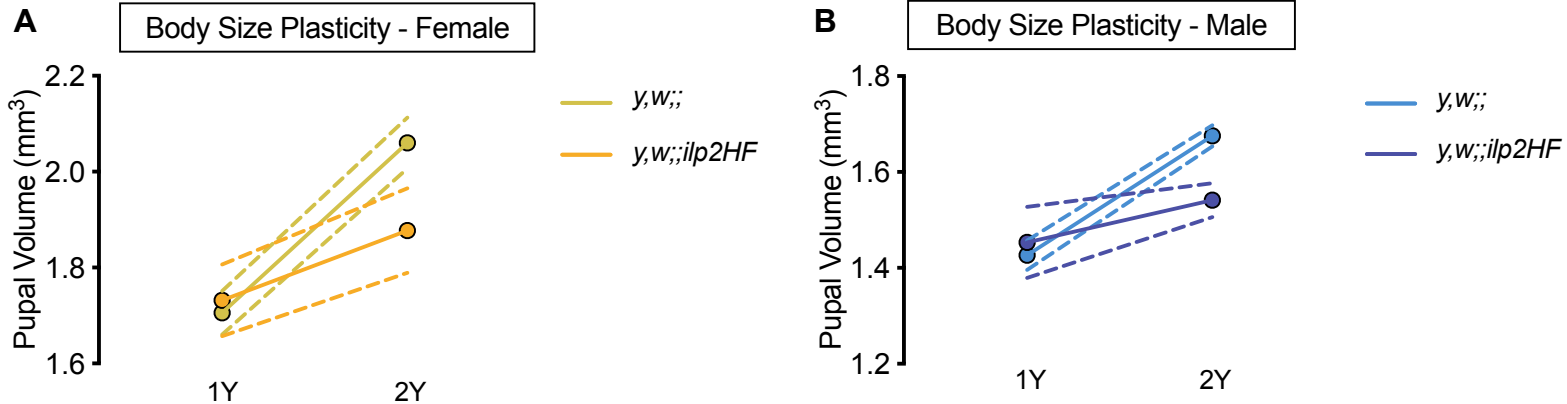

Supplement: supp [file elife-58341-supp-v1.zip]

**Figure 1 - figure supplement 1**

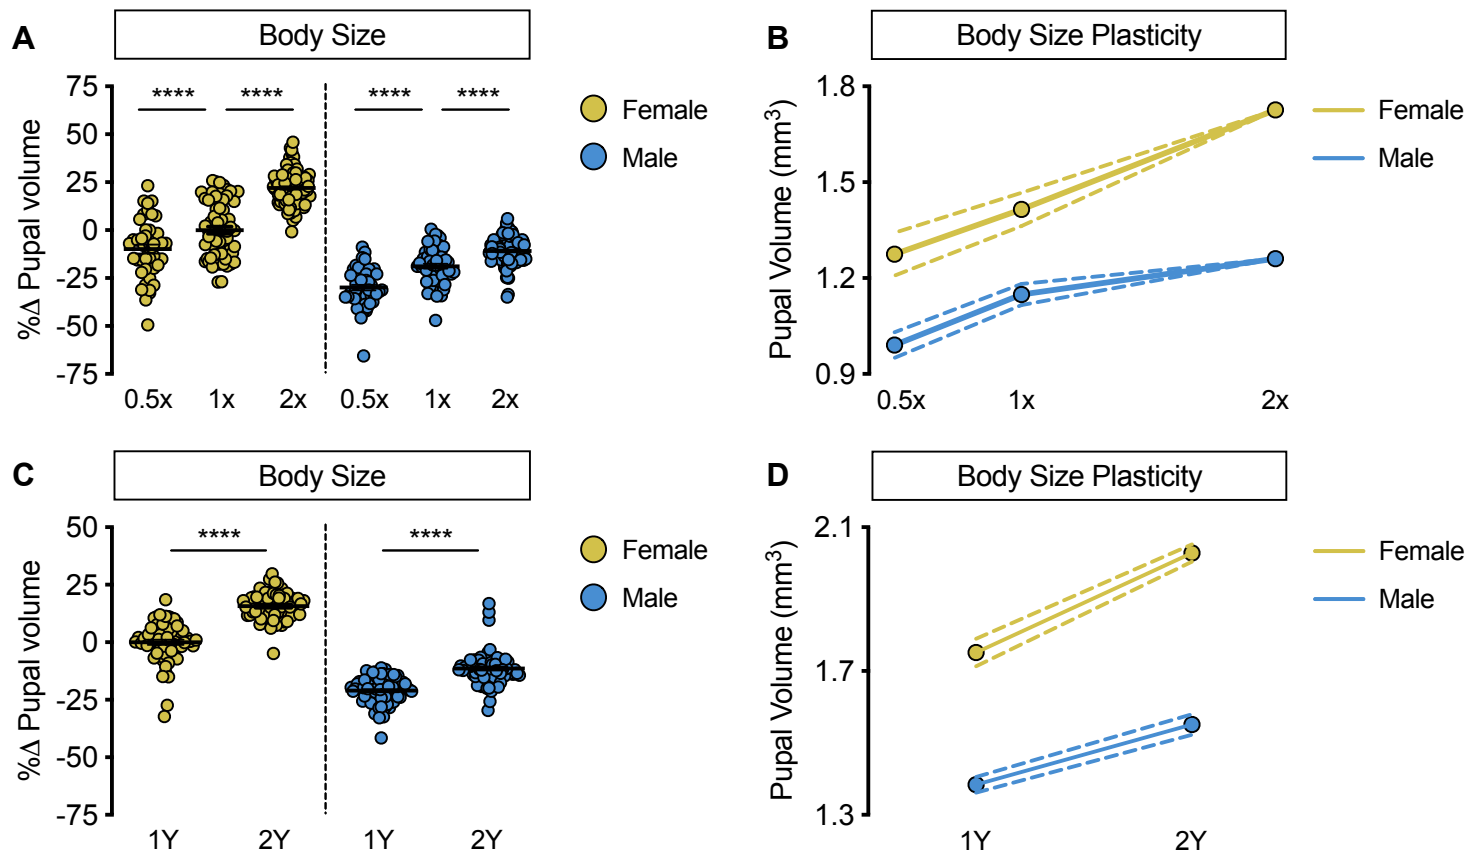

Supplement: supp [file elife-58341-supp-v1.zip]

**Figure 1 - figure supplement 5**

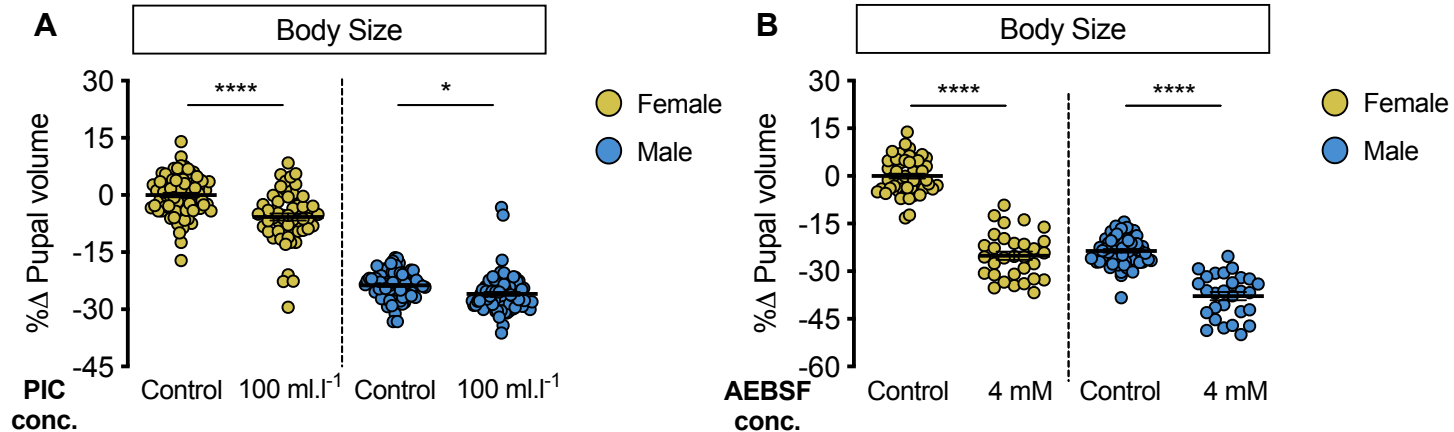

Supplement: supp [file elife-58341-supp-v1.zip]

**Figure 4 - figure supplement 3**

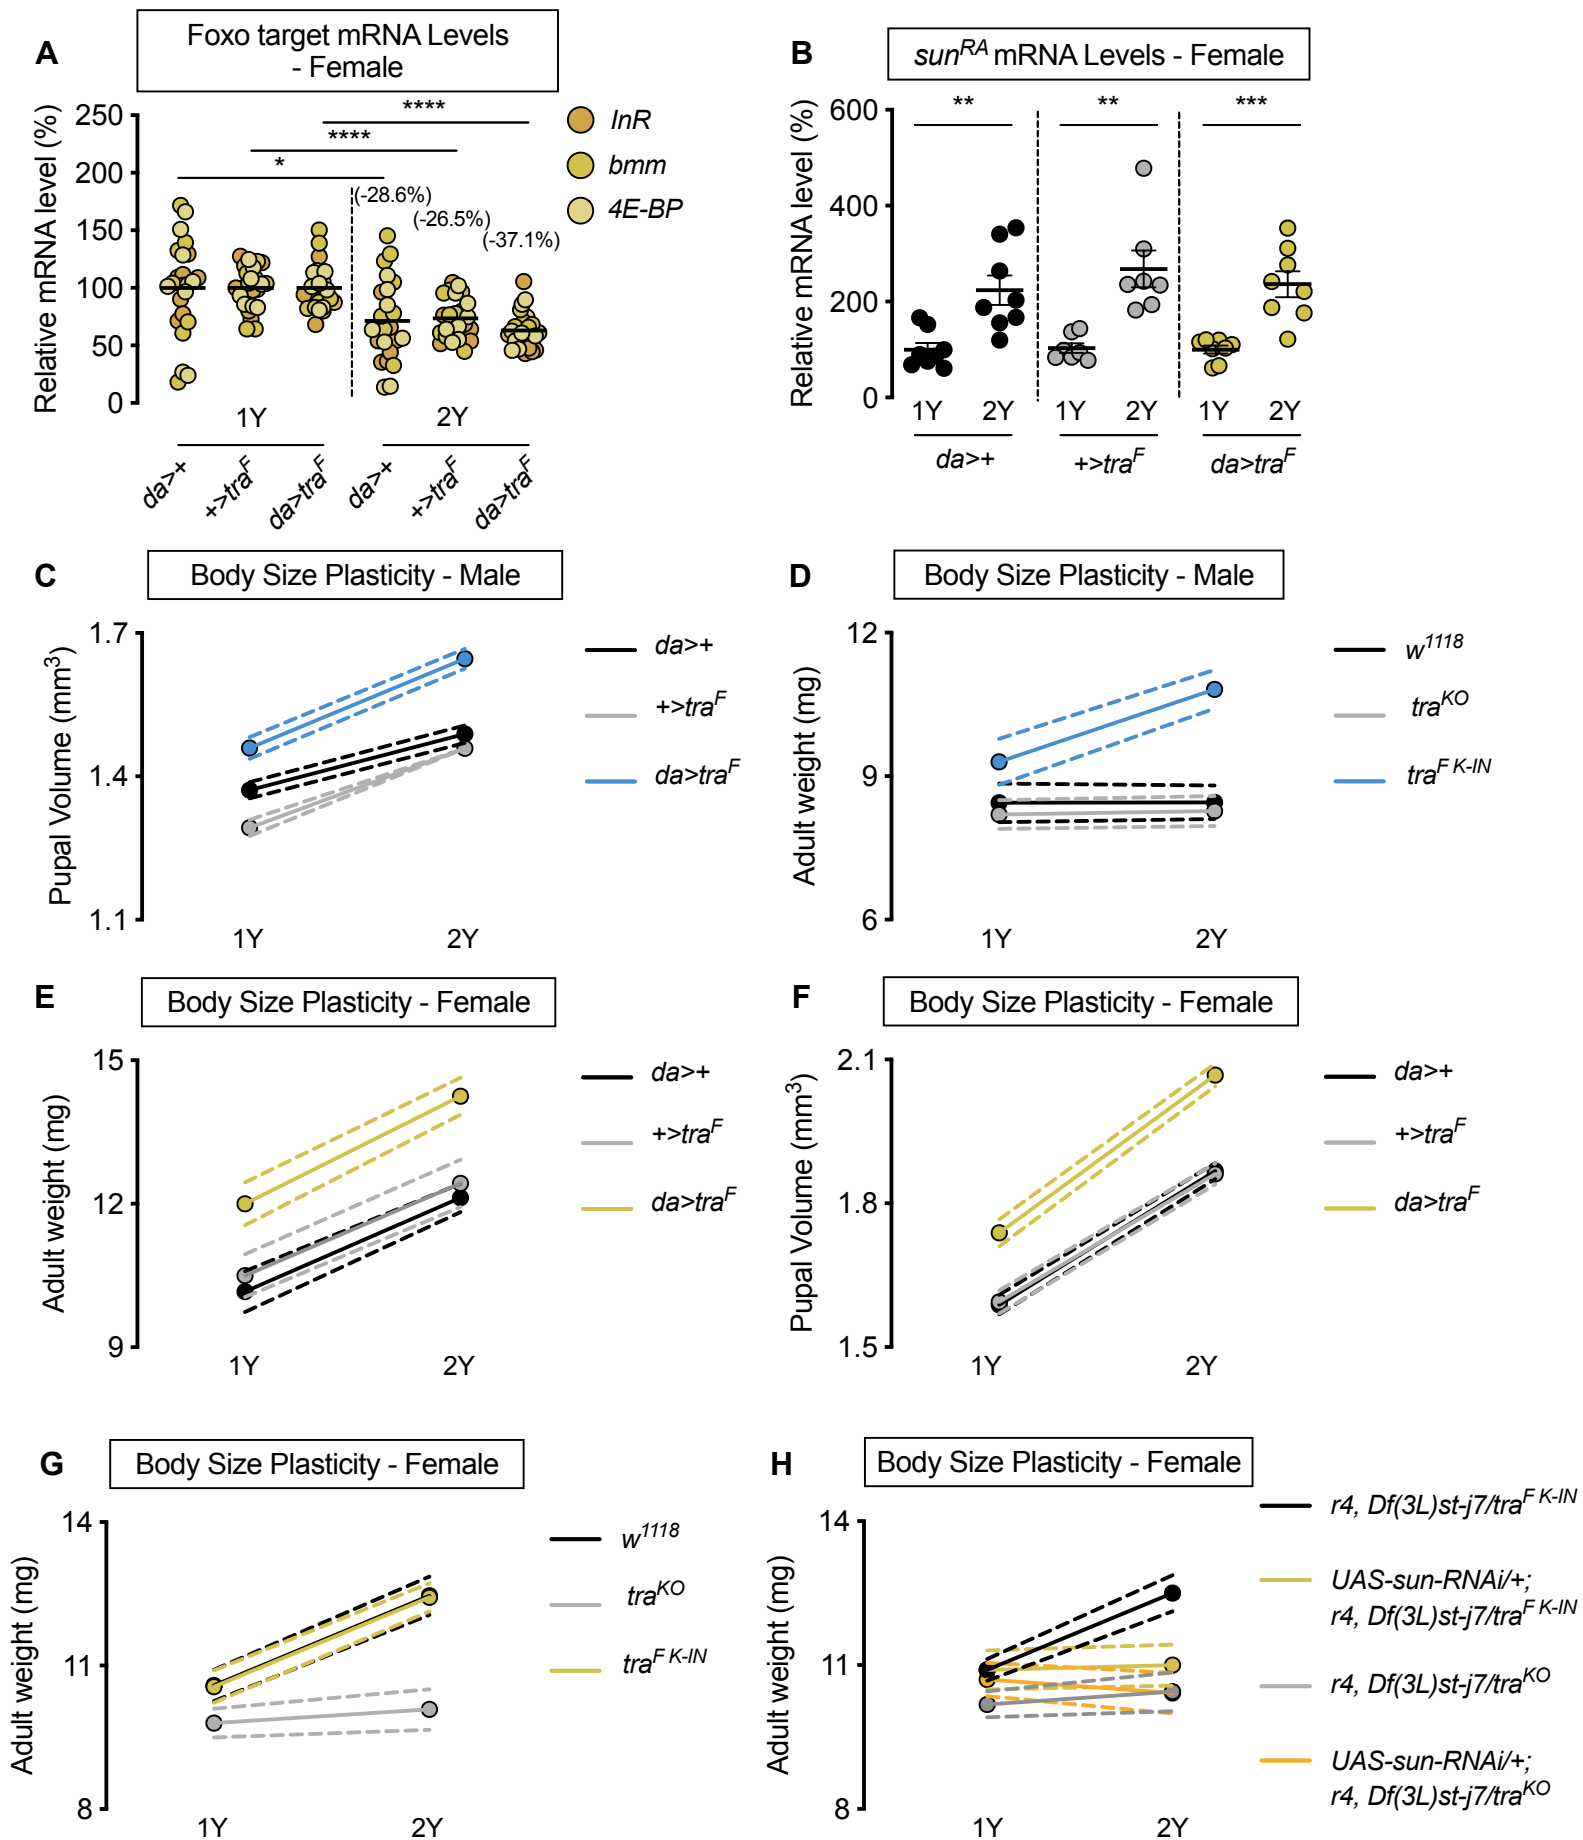

Supplement: supp [file elife-58341-supp-v1.zip]

**Figure 5 - figure supplement 2**

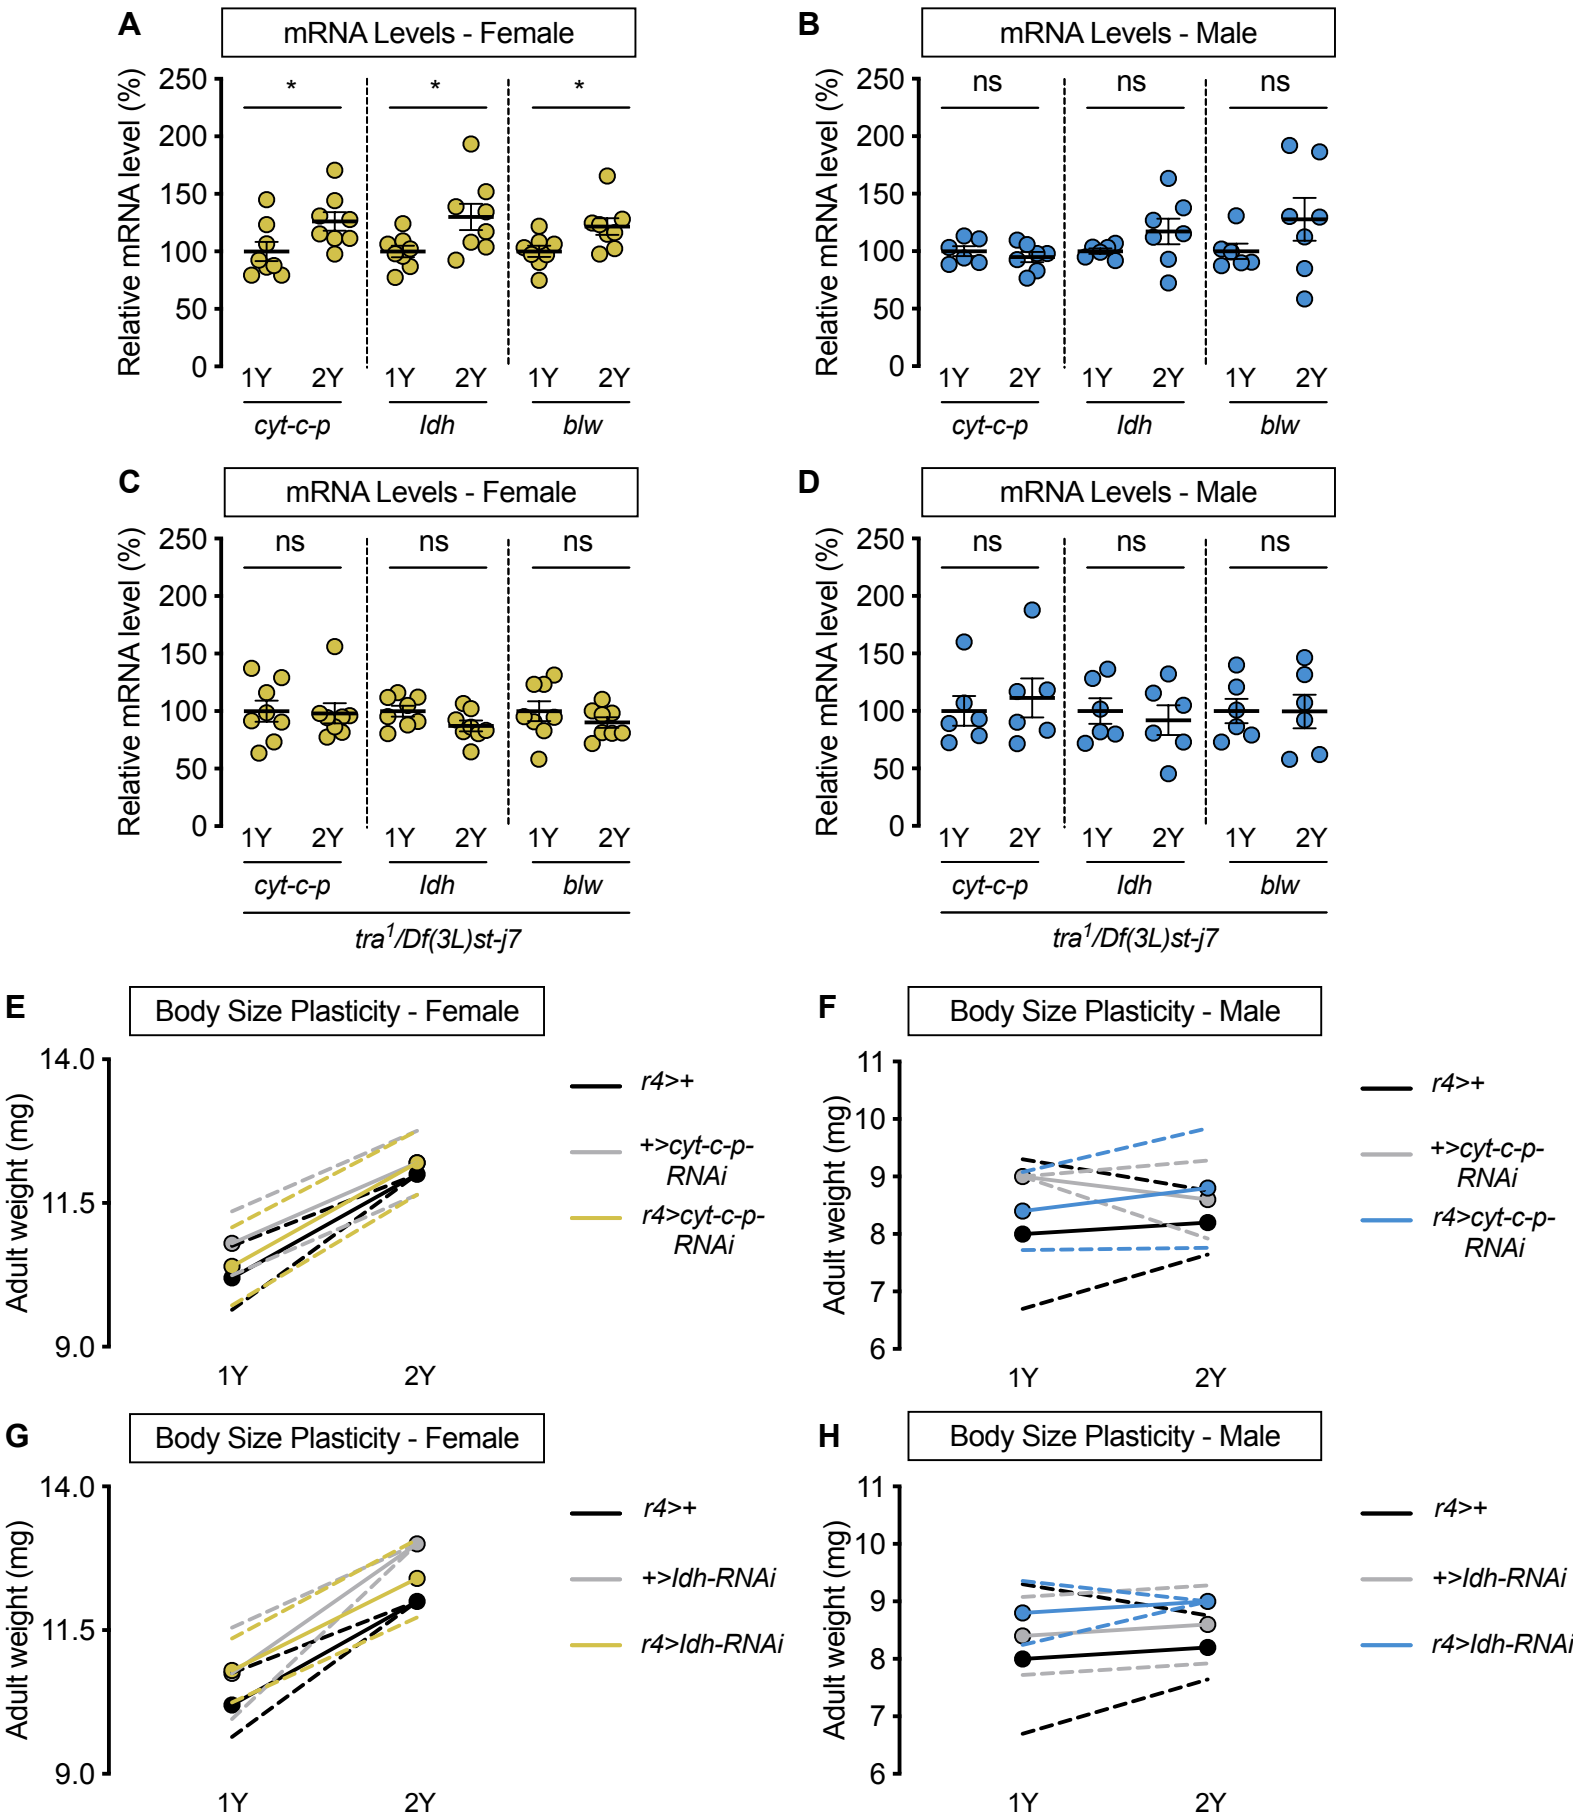

Supplement: supp [file elife-58341-supp-v1.zip]

Figure 3 - figure supplement 5

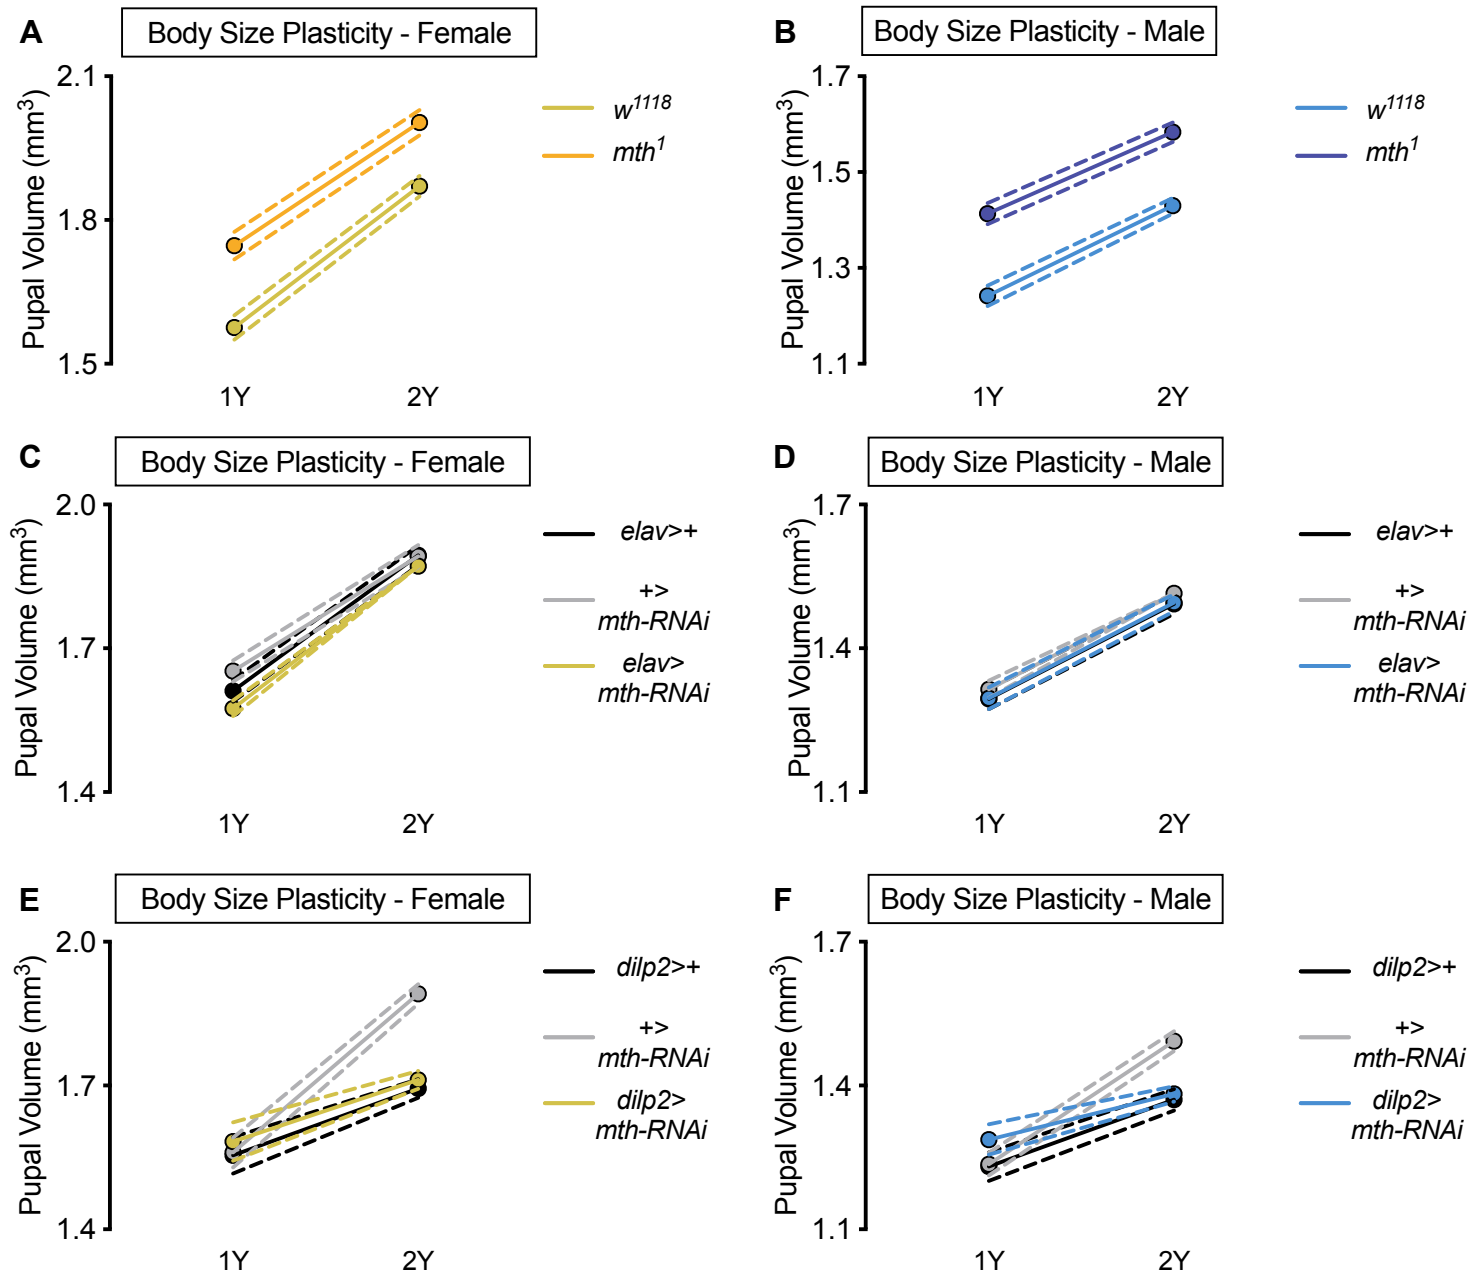

Supplement: supp [file elife-58341-supp-v1.zip]

**Figure 1 - figure supplement 2**

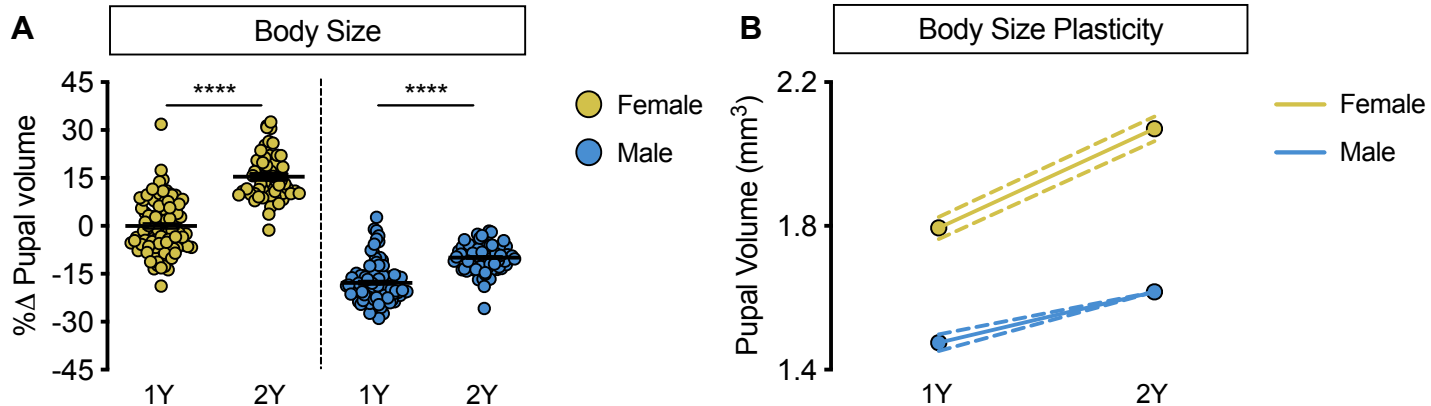

Supplement: supp [file elife-58341-supp-v1.zip › elife_poa_e58341_Figure_1_figure_supplement_2.pdf]

**Figure 1 - figure supplement 3**

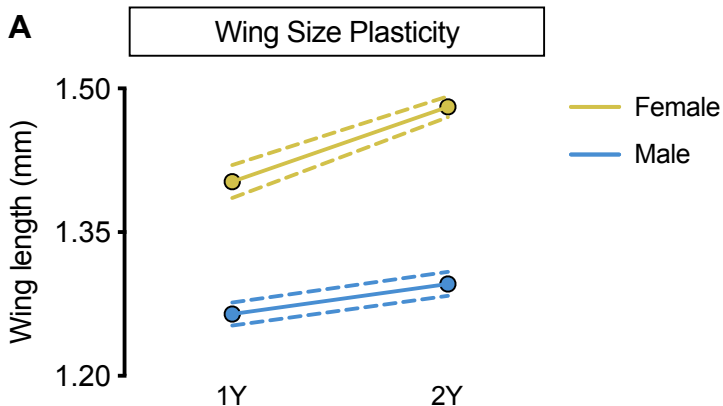

Supplement: supp [file elife-58341-supp-v1.zip › elife_poa_e58341_Figure_1_figure_supplement_3.pdf]

**Figure 1 - figure supplement 6**

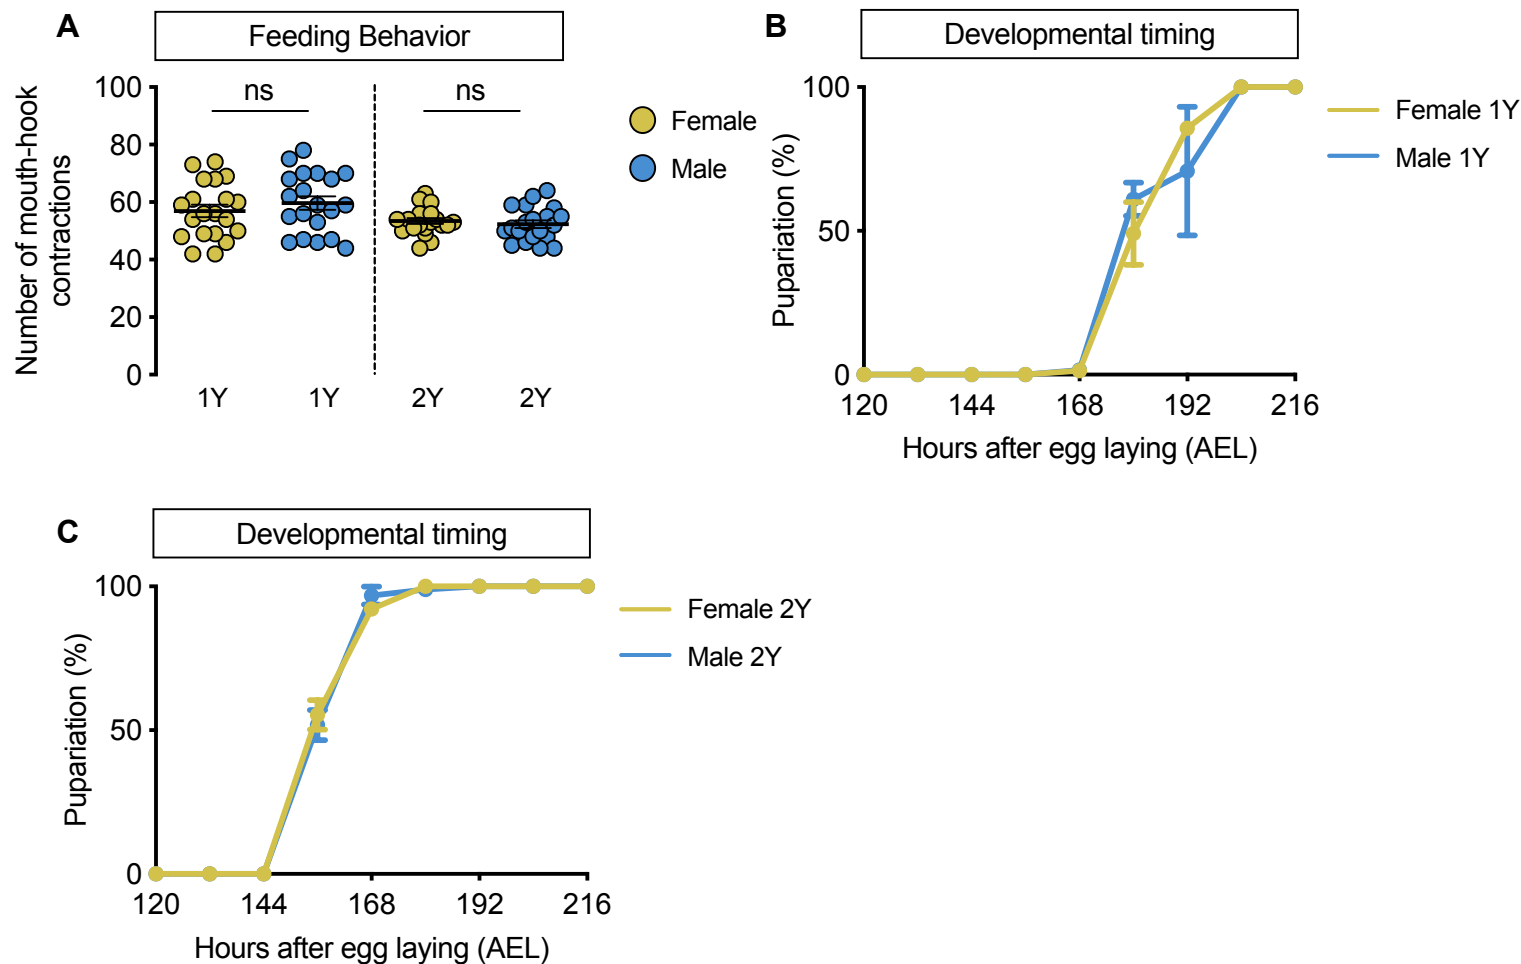

Supplement: supp [file elife-58341-supp-v1.zip › elife_poa_e58341_Figure_1_figure_supplement_6.pdf]

**Figure 1 - figure supplement 7**

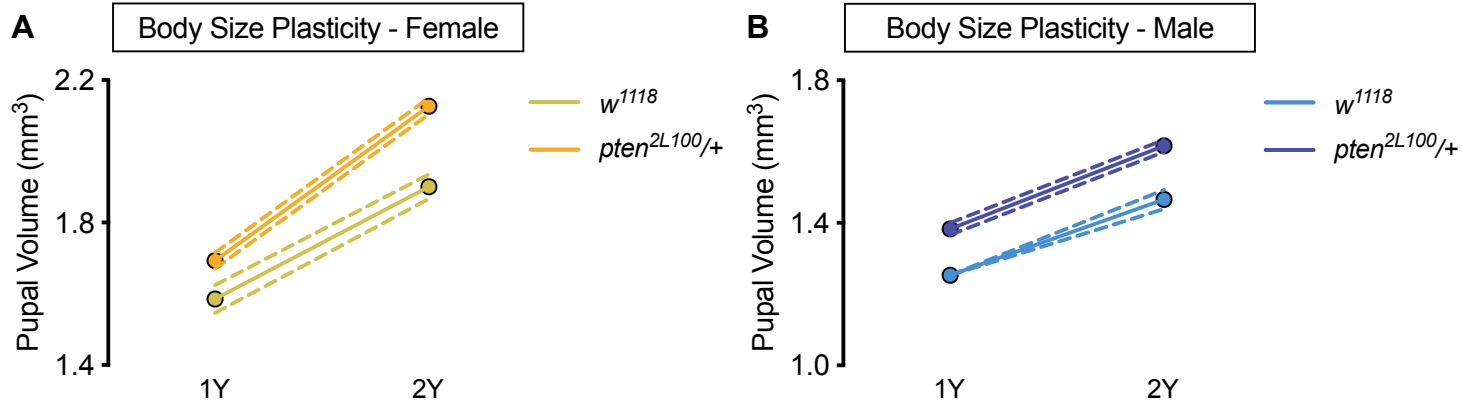

Supplement: supp [file elife-58341-supp-v1.zip › elife_poa_e58341_Figure_1_figure_supplement_7.pdf]

**Figure 2 - figure supplement 1**

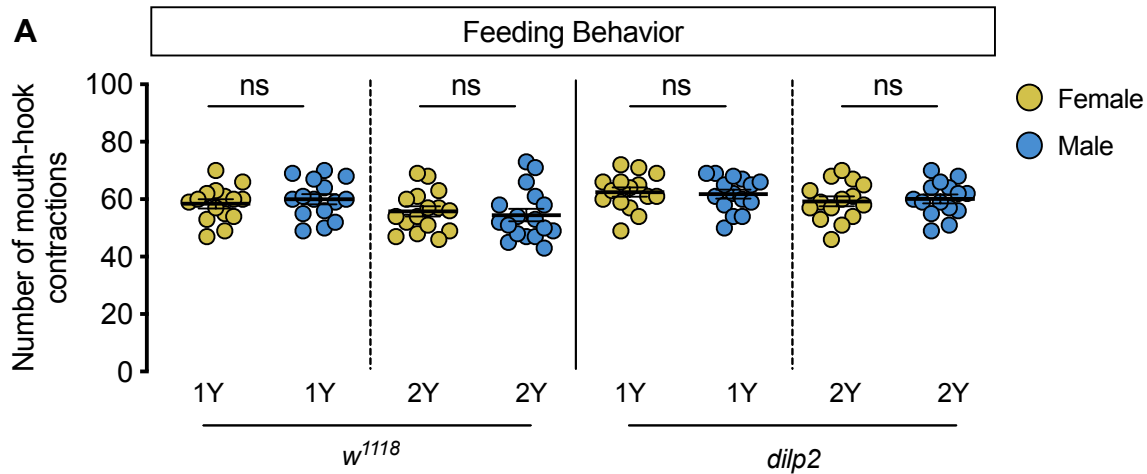

Supplement: supp [file elife-58341-supp-v1.zip › elife_poa_e58341_Figure_2_figure_supplement_1.pdf]

**Figure 2 - figure supplement 4**

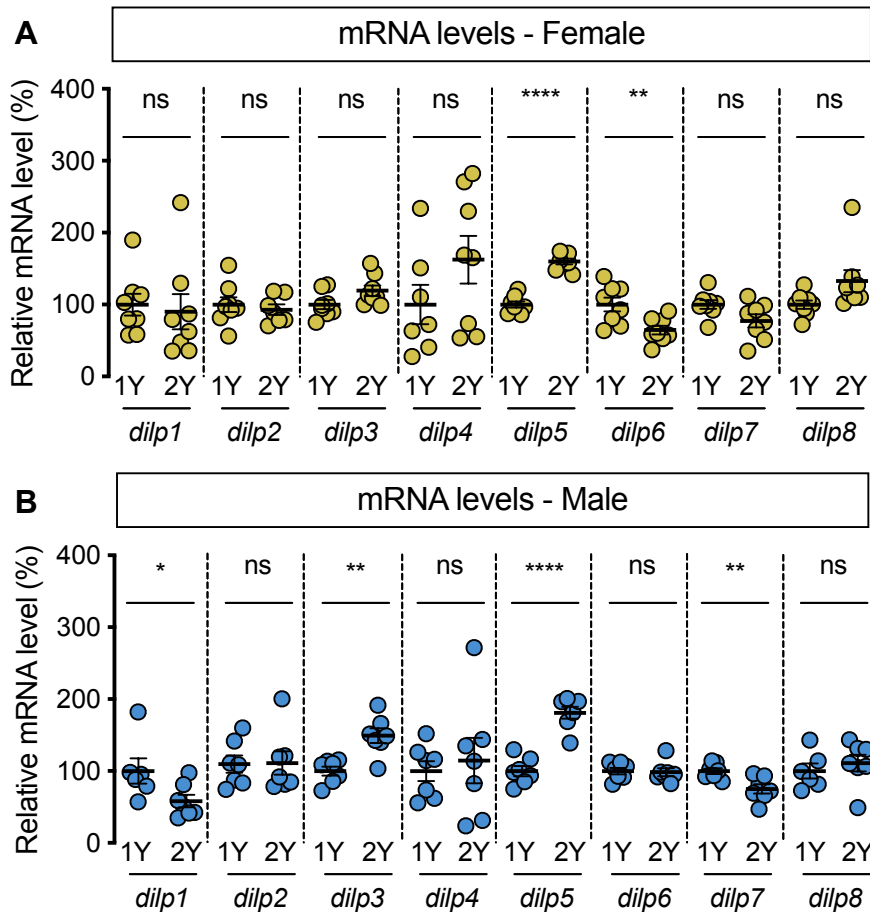

Supplement: supp [file elife-58341-supp-v1.zip › elife_poa_e58341_Figure_2_figure_supplement_4.pdf]

**Figure 3 - figure supplement 3**

**A**

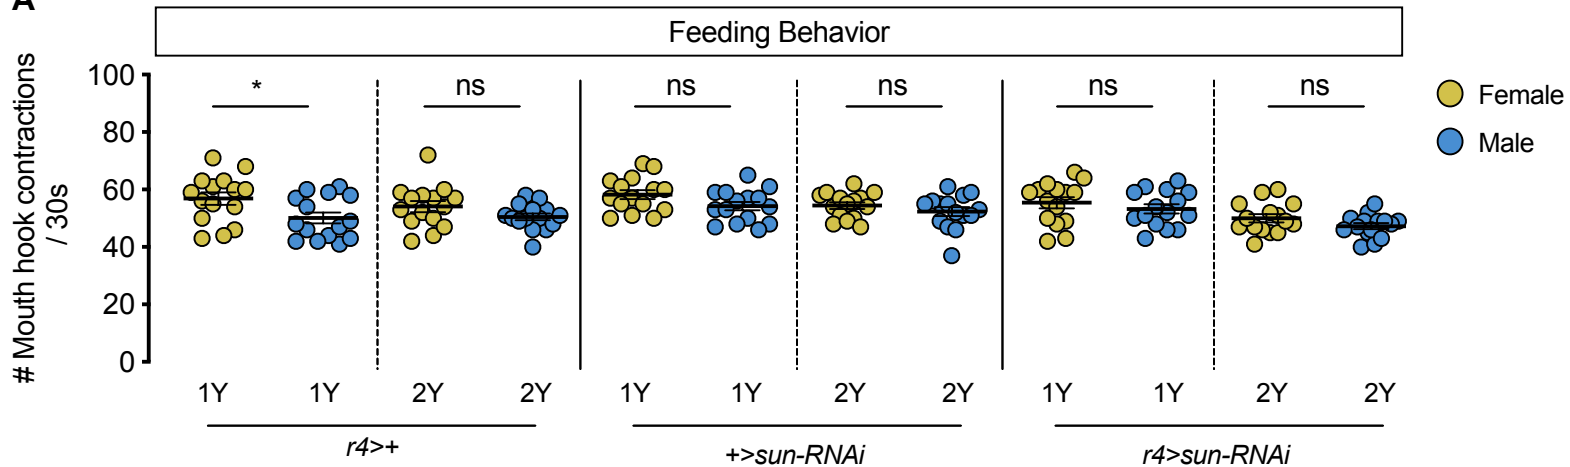

Supplement: supp [file elife-58341-supp-v1.zip › elife_poa_e58341_Figure_3_figure_supplement_3.pdf]

**Figure 3 - figure supplement 4**

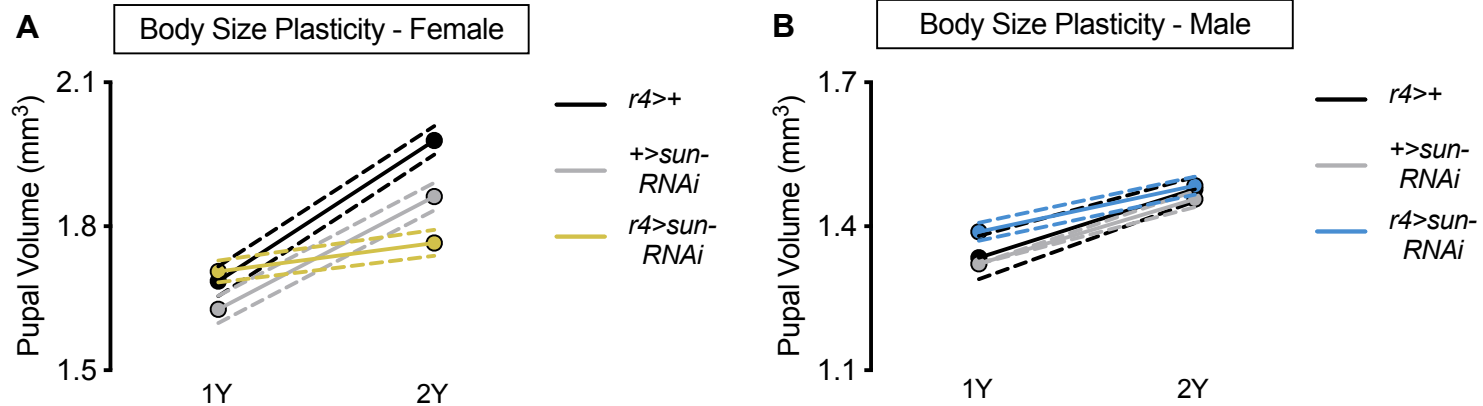

Supplement: supp [file elife-58341-supp-v1.zip › elife_poa_e58341_Figure_3_figure_supplement_4.pdf]

Figure 3 - figure supplement 6

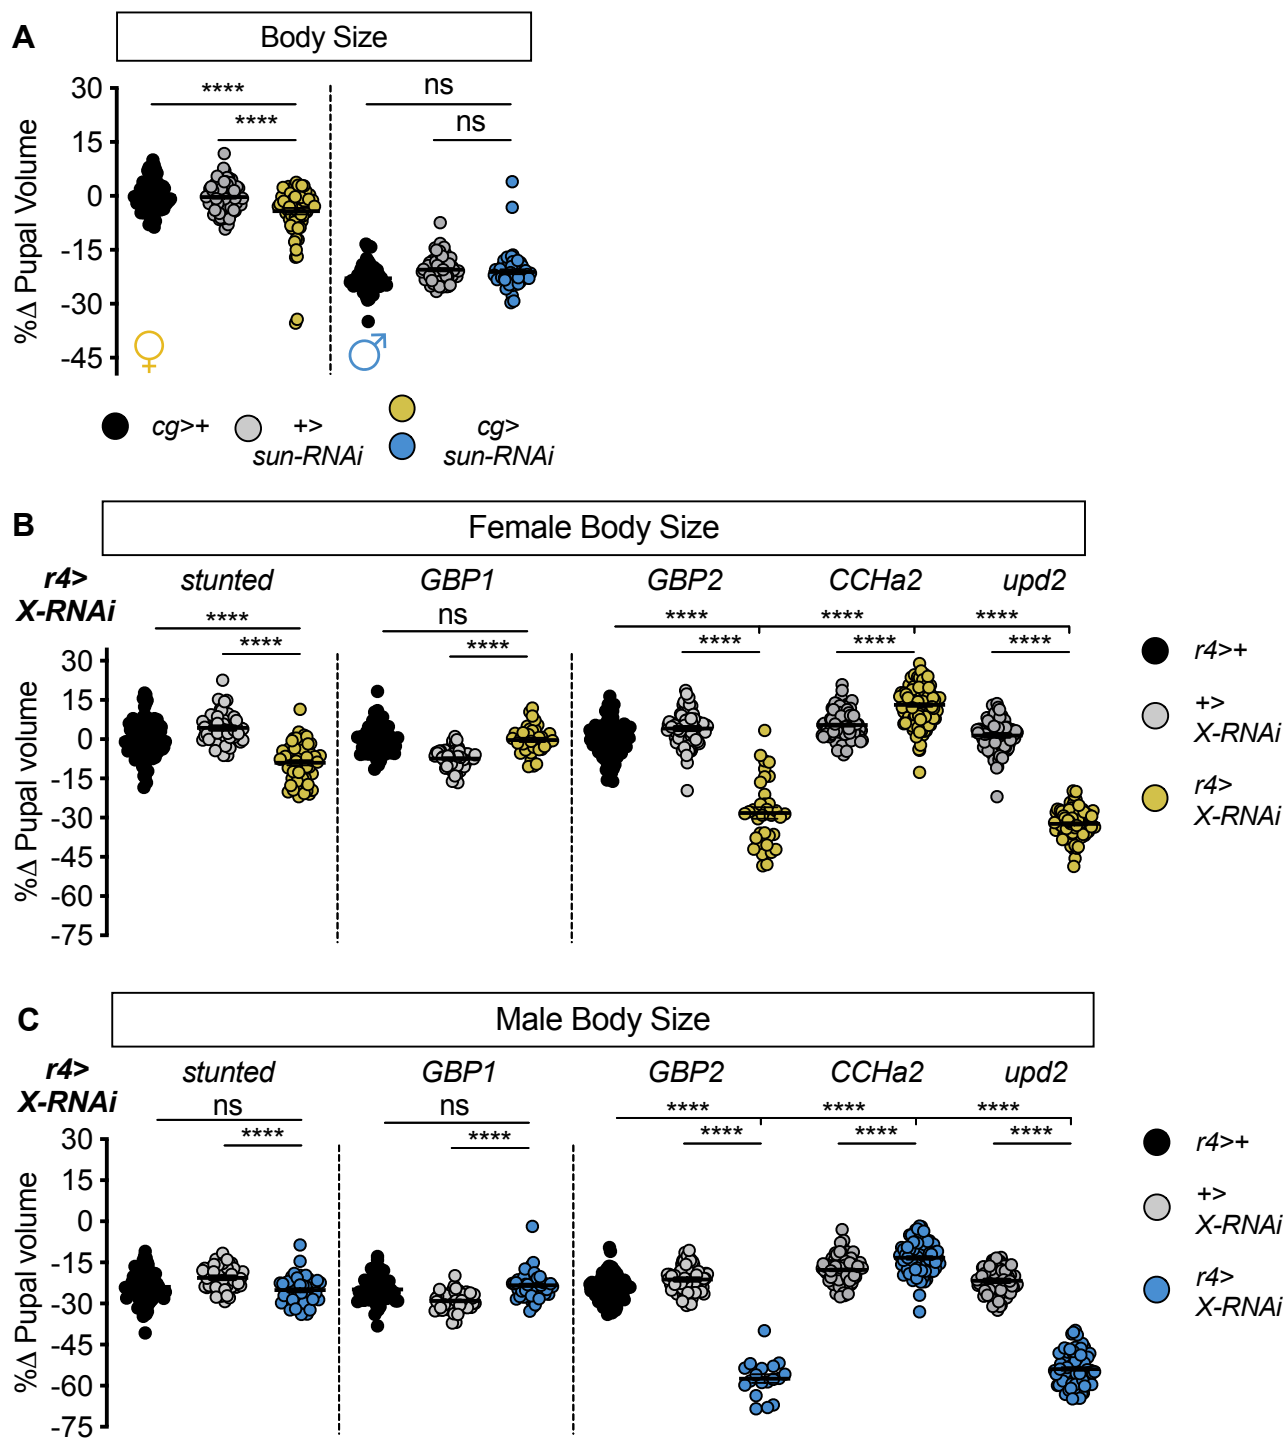

Supplement: supp [file elife-58341-supp-v1.zip › elife_poa_e58341_Figure_3_figure_supplement_6.pdf]

**Figure 3 - figure supplement 7**

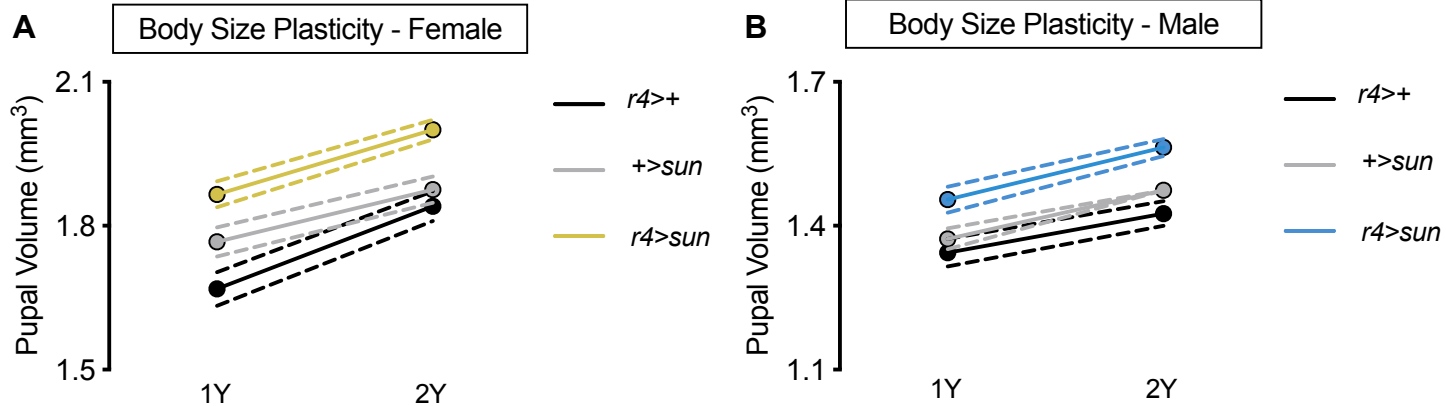

Supplement: supp [file elife-58341-supp-v1.zip › elife_poa_e58341_Figure_3_figure_supplement_7.pdf]

Figure 4 - figure supplement 2

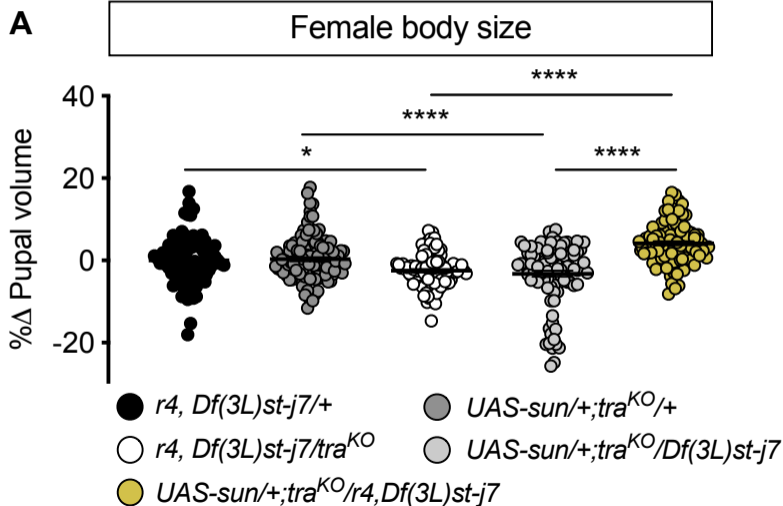

Supplement: supp [file elife-58341-supp-v1.zip › elife_poa_e58341_Figure_4_figure_supplement_2.pdf]

Figure 5 - figure supplement 1

A

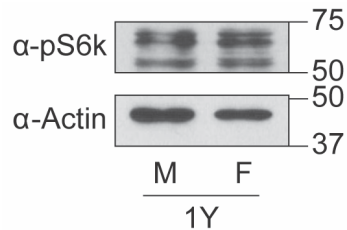

B

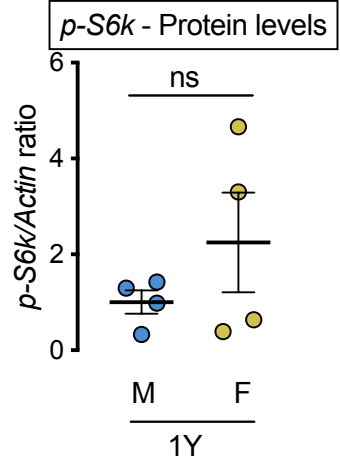

C

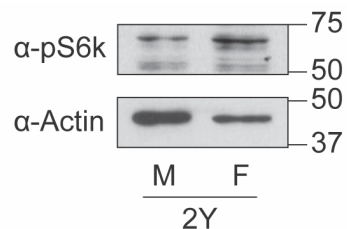

D

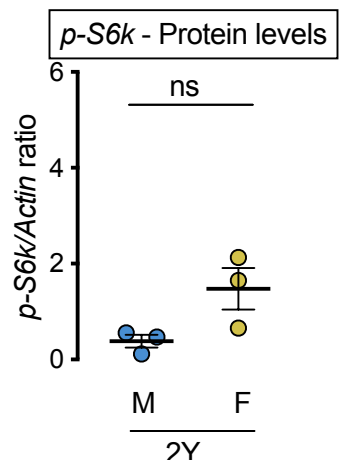

E

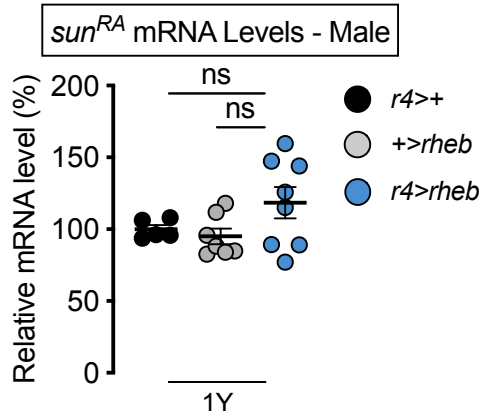

F

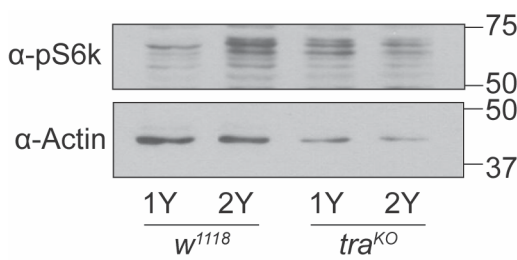

G

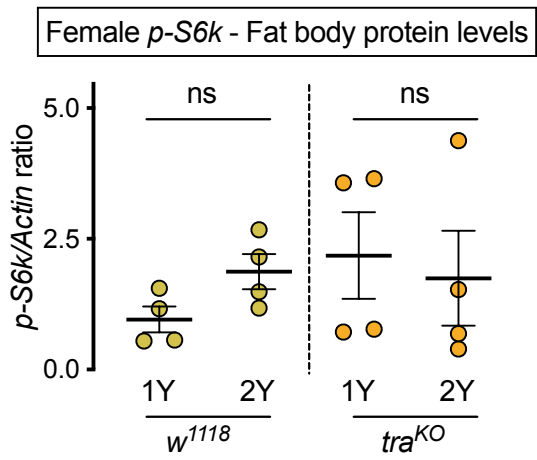

Supplement: supp [file elife-58341-supp-v1.zip › elife_poa_e58341_Figure_5_figure_supplement_1.pdf]
